# Supplementary material for: A tuned affinity-based staurosporine probe for in situ profiling of protein kinases
Source: Royal Society of Chemistry journal article supplement (doi:10.1039/c4cc00184b), 2014-01-01
Supplement: c4cc00184b.zip [file ms table s1_ 2 _ 3.xlsx]

## Sheet: Table S1 in vitro
ID	Description	Mass	Score	emPAI	Peptides matched
P78527	PRKDC_HUMAN DNA-dependent protein kinase catalytic subunit OS=Homo sapiens GN=PRKDC PE=1 SV=3	473749	431	0.13	22(9)
H3BTN5	H3BTN5_HUMAN Pyruvate kinase (Fragment) OS=Homo sapiens GN=PKM PE=2 SV=1	53524	388	0.93	19(11)
P00558	PGK1_HUMAN Phosphoglycerate kinase 1 OS=Homo sapiens GN=PGK1 PE=1 SV=3	44985	264	1.03	11(4)
P15531	NDKA_HUMAN Nucleoside diphosphate kinase A OS=Homo sapiens GN=NME1 PE=1 SV=1	15422	100	0.82	3(1)
B2R5T5	B2R5T5_HUMAN Protein kinase, cAMP-dependent, regulatory, type I, alpha (Tissue specific extinguisher 1), isoform CRA_a OS=Homo sapiens GN=PRKAR1A PE=2 SV=1	43183	61	0.08	2(1)
B7Z7A9	B7Z7A9_HUMAN Phosphoglycerate kinase OS=Homo sapiens GN=PGK1 PE=2 SV=1	41802	59	0.43	4(0)
P10398	ARAF_HUMAN Serine/threonine-protein kinase A-Raf OS=Homo sapiens GN=ARAF PE=1 SV=2	68341	55	0.13	2(1)
H0YFA7	H0YFA7_HUMAN Bifunctional UDP-N-acetylglucosamine 2-epimerase/N-acetylmannosamine kinase OS=Homo sapiens GN=GNE PE=2 SV=2	79555	48	0.04	1(1)
P13861	KAP2_HUMAN cAMP-dependent protein kinase type II-alpha regulatory subunit OS=Homo sapiens GN=PRKAR2A PE=1 SV=2	45832	47	0.07	4(1)
B5BU16	B5BU16_HUMAN Mitogen-activated protein kinase kinase 6 OS=Homo sapiens GN=MAP2K6 PE=2 SV=1	37782	43	0.18	2(0)
B1ALA9	B1ALA9_HUMAN Ribose-phosphate pyrophosphokinase 1 OS=Homo sapiens GN=PRPS1 PE=2 SV=1	24468	41	0.29	2(0)
A4QPA9	A4QPA9_HUMAN Mitogen-activated protein kinase kinase 1 OS=Homo sapiens GN=MAP2K1 PE=2 SV=1	43753	40	0.08	2(1)
G3V5T9	G3V5T9_HUMAN Cyclin-dependent kinase 2 OS=Homo sapiens GN=CDK2 PE=2 SV=1	39553	39	0.17	2(0)
B4DHB3	B4DHB3_HUMAN Phosphoglycerate kinase OS=Homo sapiens PE=2 SV=1	30258	38	0.11	1(0)
Q5JT09	Q5JT09_HUMAN Uridine-cytidine kinase 1 OS=Homo sapiens GN=UCK1 PE=2 SV=1	32540	38	0.1	1(1)
Q14DU5	Q14DU5_HUMAN ROCK2 protein OS=Homo sapiens GN=ROCK2 PE=2 SV=1	82724	36	0.04	1(0)			Kinase
Q01813	K6PP_HUMAN 6-phosphofructokinase type C OS=Homo sapiens GN=PFKP PE=1 SV=2	86454	34	0.12	3(0)
G3V461	G3V461_HUMAN Creatine kinase B-type (Fragment) OS=Homo sapiens GN=CKB PE=2 SV=1	14383	32	0.24	1(0)
P08237	K6PF_HUMAN 6-phosphofructokinase, muscle type OS=Homo sapiens GN=PFKM PE=1 SV=2	85984	31	0.05	1(0)
P36507	MP2K2_HUMAN Dual specificity mitogen-activated protein kinase kinase 2 OS=Homo sapiens GN=MAP2K2 PE=1 SV=1	44681	31	0.07	2(0)
F8WBH4	F8WBH4_HUMAN Interferon-induced, double-stranded RNA-activated protein kinase (Fragment) OS=Homo sapiens GN=EIF2AK2 PE=2 SV=1	11298	30	0.3	1(0)
Q13131	AAPK1_HUMAN 5~-AMP-activated protein kinase catalytic subunit alpha-1 OS=Homo sapiens GN=PRKAA1 PE=1 SV=4	64596	30	0.1	2(0)
P19367	HXK1_HUMAN Hexokinase-1 OS=Homo sapiens GN=HK1 PE=1 SV=3	103561	28	0.05	1(0)
Q15208	STK38_HUMAN Serine/threonine-protein kinase 38 OS=Homo sapiens GN=STK38 PE=1 SV=1	54498	27	0.06	1(0)
Q5R3A8	Q5R3A8_HUMAN Tyrosine-protein kinase Fyn OS=Homo sapiens GN=FYN PE=2 SV=1	55205	25	0.11	4(0)
Q7Z7Q6	Q7Z7Q6_HUMAN Hexokinase II (Fragment) OS=Homo sapiens PE=2 SV=1	5875	25	0.61	1(0)
E5RIU6	E5RIU6_HUMAN Cyclin-dependent kinase 1 (Fragment) OS=Homo sapiens GN=CDK1 PE=2 SV=2	21782	23	0.15	3(0)
M0QYH2	M0QYH2_HUMAN Bifunctional polynucleotide phosphatase/kinase OS=Homo sapiens GN=PNKP PE=4 SV=1	54120	23	0.06	1(0)
F8VTV8	F8VTV8_HUMAN Cyclin-dependent kinase 4 OS=Homo sapiens GN=CDK4 PE=2 SV=1	22238	22	0.32	3(0)
Q9Y6E0	STK24_HUMAN Serine/threonine-protein kinase 24 OS=Homo sapiens GN=STK24 PE=1 SV=1	49562	20	0.09	1(0)
Q5JQ10	Q5JQ10_HUMAN Adenosine kinase, isoform CRA_a OS=Homo sapiens GN=ADK PE=2 SV=1	39078	20	0.08	1(0)
J3KPD9	J3KPD9_HUMAN Nucleoside diphosphate kinase B OS=Homo sapiens GN=NME2 PE=3 SV=1	22522	19	0.15	1(0)
P32298	GRK4_HUMAN G protein-coupled receptor kinase 4 OS=Homo sapiens GN=GRK4 PE=1 SV=3	67738	18	0.05	1(0)
P15531	NDKA_HUMAN Nucleoside diphosphate kinase A OS=Homo sapiens GN=NME1 PE=1 SV=1	17309	17	0.2	2(0)
C1PHA2	C1PHA2_HUMAN Tyrosine-protein kinase receptor OS=Homo sapiens GN=KIF5B-ALK PE=2 SV=1	169283	16	0.02	3(0)
H3BNI9	H3BNI9_HUMAN Casein kinase II subunit alpha~ (Fragment) OS=Homo sapiens GN=CSNK2A2 PE=2 SV=1	15632	16	0.22	2(0)
E5RJR5	E5RJR5_HUMAN S-phase kinase-associated protein 1 OS=Homo sapiens GN=SKP1 PE=2 SV=1	18879	50	0.18	1(1)
Q5T9B7	Q5T9B7_HUMAN Adenylate kinase isoenzyme 1 OS=Homo sapiens GN=AK1 PE=2 SV=1	23624	48	0.14	1(1)
B0AZV0	B0AZV0_HUMAN Serine-threonine kinase receptor-associated protein OS=Homo sapiens GN=STRAP PE=2 SV=1	28716	45	0.12	1(1)
I3L2T9	I3L2T9_HUMAN Mixed lineage kinase domain-like protein (Fragment) OS=Homo sapiens GN=MLKL PE=2 SV=1	25116	36	0.13	1(0)
Q7L9L4	MOB1B_HUMAN MOB kinase activator 1B OS=Homo sapiens GN=MOB1B PE=1 SV=3	25246	20	0.13	1(0)
K9JA46	K9JA46_HUMAN Epididymis luminal secretory protein 52 OS=Homo sapiens GN=EL52 PE=2 SV=1	85006	942	0.83	33(20)
B4DMA2	B4DMA2_HUMAN cDNA FLJ54023, highly similar to Heat shock protein HSP 90-beta OS=Homo sapiens PE=2 SV=1	79487	773	0.99	36(18)
P11142	HSP7C_HUMAN Heat shock cognate 71 kDa protein OS=Homo sapiens GN=HSPA8 PE=1 SV=1	71082	660	1.26	27(13)
Q5R206	Q5R206_HUMAN Carbamoylphosphate synthetase I OS=Homo sapiens GN=CPS1 PE=2 SV=1	165914	581	0.48	31(14)
F5GWP8	F5GWP8_HUMAN Junction plakoglobin OS=Homo sapiens GN=JUP PE=2 SV=1	66708	555	0.7	21(13)
B4DI39	B4DI39_HUMAN cDNA FLJ54328, highly similar to Heat shock 70 kDa protein 1 OS=Homo sapiens PE=2 SV=1	67775	536	0.85	21(14)
P25705	ATPA_HUMAN ATP synthase subunit alpha, mitochondrial OS=Homo sapiens GN=ATP5A1 PE=1 SV=1	59828	507	1.01	23(10)
P54652	HSP72_HUMAN Heat shock-related 70 kDa protein 2 OS=Homo sapiens GN=HSPA2 PE=1 SV=1	70263	465	0.51	16(9)
Q5HY54	Q5HY54_HUMAN Filamin-A OS=Homo sapiens GN=FLNA PE=2 SV=1	279115	463	0.23	23(12)
B4DEM7	B4DEM7_HUMAN T-complex protein 1 subunit theta OS=Homo sapiens GN=CCT8 PE=2 SV=1	58179	462	0.94	20(10)
P06733	ENOA_HUMAN Alpha-enolase OS=Homo sapiens GN=ENO1 PE=1 SV=2	47481	462	1.39	21(9)
Q5VTE0	EF1A3_HUMAN Putative elongation factor 1-alpha-like 3 OS=Homo sapiens GN=EEF1A1P5 PE=5 SV=1	50495	457	0.77	19(15)
P07355	ANXA2_HUMAN Annexin A2 OS=Homo sapiens GN=ANXA2 PE=1 SV=2	38808	442	1.26	17(10)
B2RBS8	B2RBS8_HUMAN cDNA, FLJ95666, highly similar to Homo sapiens albumin (ALB), mRNA OS=Homo sapiens PE=2 SV=1	71343	435	0.37	28(10)
B2RCQ9	B2RCQ9_HUMAN cDNA, FLJ96225, highly similar to Homo sapiens heat shock 70kDa protein 1-like (HSPA1L), mRNA OS=Homo sapiens PE=2 SV=1	70731	395	0.37	13(8)
Q15149-3	PLEC_HUMAN Isoform 3 of Plectin OS=Homo sapiens GN=PLEC	519655	392	0.14	23(9)
A8K7F6	A8K7F6_HUMAN cDNA FLJ78244, highly similar to Homo sapiens eukaryotic translation initiation factor 4A, isoform 1 (EIF4A1), mRNA OS=Homo sapiens PE=2 SV=1	46321	375	0.99	17(10)
Q53HF2	Q53HF2_HUMAN Heat shock 70kDa protein 8 isoform 2 variant (Fragment) OS=Homo sapiens PE=2 SV=1	53580	373	1.3	17(9)
B7Z1V7	B7Z1V7_HUMAN cDNA FLJ51811, highly similar to Stress-70 protein, mitochondrial OS=Homo sapiens PE=2 SV=1	47504	361	0.71	14(6)
O75369	FLNB_HUMAN Filamin-B OS=Homo sapiens GN=FLNB PE=1 SV=2	280157	361	0.2	20(8)
Q6NVC0	Q6NVC0_HUMAN SLC25A5 protein (Fragment) OS=Homo sapiens GN=SLC25A5 PE=2 SV=1	35499	360	1.23	18(9)
P49327	FAS_HUMAN Fatty acid synthase OS=Homo sapiens GN=FASN PE=1 SV=3	275877	348	0.18	22(9)
P13639	EF2_HUMAN Elongation factor 2 OS=Homo sapiens GN=EEF2 PE=1 SV=4	96246	339	0.49	15(9)
P12956	XRCC6_HUMAN X-ray repair cross-complementing protein 6 OS=Homo sapiens GN=XRCC6 PE=1 SV=2	70084	326	0.66	16(7)
B3GQS7	B3GQS7_HUMAN Mitochondrial heat shock 60kD protein 1 variant 1 OS=Homo sapiens GN=HSPD1 PE=2 SV=1	60813	312	0.78	17(10)
A4QPB0	A4QPB0_HUMAN IQ motif containing GTPase activating protein 1 OS=Homo sapiens GN=IQGAP1 PE=2 SV=1	189789	294	0.27	17(3)
B4DTG2	B4DTG2_HUMAN Elongation factor 1-gamma OS=Homo sapiens GN=EEF1G PE=2 SV=1	56456	287	0.49	13(7)
A8K5I0	A8K5I0_HUMAN Heat shock 70kDa protein 1A OS=Homo sapiens GN=HSPA1B PE=2 SV=1	70294	276	0.65	15(5)
B4DUI5	B4DUI5_HUMAN Triosephosphate isomerase OS=Homo sapiens PE=2 SV=1	23085	269	2.38	10(5)
H3BLZ8	H3BLZ8_HUMAN Probable ATP-dependent RNA helicase DDX17 OS=Homo sapiens GN=DDX17 PE=2 SV=1	81073	264	0.27	9(6)
Q5TZZ9	Q5TZZ9_HUMAN Annexin OS=Homo sapiens GN=ANXA1 PE=2 SV=1	38918	263	0.39	4(4)
H3BQN4	H3BQN4_HUMAN Fructose-bisphosphate aldolase OS=Homo sapiens GN=ALDOA PE=2 SV=1	39772	262	0.38	9(5)
B3KNL2	B3KNL2_HUMAN RuvB-like 2 (E. coli), isoform CRA_d OS=Homo sapiens GN=RUVBL2 PE=2 SV=1	47603	261	0.83	13(6)
B0YJC4	B0YJC4_HUMAN Vimentin OS=Homo sapiens GN=VIM PE=2 SV=1	49680	259	0.67	12(6)
P11586	C1TC_HUMAN C-1-tetrahydrofolate synthase, cytoplasmic OS=Homo sapiens GN=MTHFD1 PE=1 SV=3	102180	253	0.33	9(5)
B7Z9L0	B7Z9L0_HUMAN T-complex protein 1 subunit delta OS=Homo sapiens GN=CCT4 PE=2 SV=1	52811	252	0.44	11(6)
P16615	AT2A2_HUMAN Sarcoplasmic/endoplasmic reticulum calcium ATPase 2 OS=Homo sapiens GN=ATP2A2 PE=1 SV=1	116336	251	0.28	10(7)
P23526	SAHH_HUMAN Adenosylhomocysteinase OS=Homo sapiens GN=AHCY PE=1 SV=4	48255	250	0.49	8(6)
B4DUQ1	B4DUQ1_HUMAN cDNA FLJ54552, highly similar to Heterogeneous nuclear ribonucleoprotein K OS=Homo sapiens PE=2 SV=1	48708	244	0.58	12(7)
I3L0K7	I3L0K7_HUMAN Heat shock protein 75 kDa, mitochondrial OS=Homo sapiens GN=TRAP1 PE=2 SV=1	57412	232	0.32	8(5)
O60701	UGDH_HUMAN UDP-glucose 6-dehydrogenase OS=Homo sapiens GN=UGDH PE=1 SV=1	55674	226	0.41	10(5)
B2R6X5	B2R6X5_HUMAN cDNA, FLJ93166, highly similar to Homo sapiens heat shock 70kDa protein 6 (HSP70B~) (HSPA6), mRNA OS=Homo sapiens PE=2 SV=1	71370	223	0.31	9(5)
B3KQT2	B3KQT2_HUMAN cDNA PSEC0148 fis, clone PLACE1007202, highly similar to Protein disulfide-isomerase A3 (EC 5.3.4.1) OS=Homo sapiens PE=2 SV=1	55268	216	0.59	11(3)
F5GWF6	F5GWF6_HUMAN T-complex protein 1 subunit beta OS=Homo sapiens GN=CCT2 PE=2 SV=2	57170	209	0.48	15(4)
P00338	LDHA_HUMAN L-lactate dehydrogenase A chain OS=Homo sapiens GN=LDHA PE=1 SV=2	36950	208	0.67	10(2)
B4DNN4	B4DNN4_HUMAN Ribonucleoside-diphosphate reductase OS=Homo sapiens PE=2 SV=1	87252	207	0.2	8(5)
G3V2B8	G3V2B8_HUMAN C-1-tetrahydrofolate synthase, cytoplasmic OS=Homo sapiens GN=MTHFD1 PE=2 SV=1	102152	206	0.29	10(6)
P62424	RL7A_HUMAN 60S ribosomal protein L7a OS=Homo sapiens GN=RPL7A PE=1 SV=2	30148	203	0.87	11(4)
E7EN95	E7EN95_HUMAN Filamin-B OS=Homo sapiens GN=FLNB PE=2 SV=1	258059	199	0.08	9(4)
J3KTA4	J3KTA4_HUMAN Probable ATP-dependent RNA helicase DDX5 OS=Homo sapiens GN=DDX5 PE=3 SV=1	69557	193	0.32	8(5)
H0YHA7	H0YHA7_HUMAN 60S ribosomal protein L18 (Fragment) OS=Homo sapiens GN=RPL18 PE=3 SV=1	19134	191	0.63	4(3)
B2R5U1	B2R5U1_HUMAN cDNA, FLJ92620, highly similar to Homo sapiens staphylococcal nuclease domain containing 1 (SND1),mRNA OS=Homo sapiens PE=2 SV=1	100294	189	0.25	11(4)
B3KX11	B3KX11_HUMAN cDNA FLJ44436 fis, clone UTERU2019706, highly similar to T-complex protein 1 subunit gamma OS=Homo sapiens PE=2 SV=1	58479	189	0.55	9(5)
B7Z4V2	B7Z4V2_HUMAN cDNA FLJ51907, highly similar to Stress-70 protein, mitochondrial OS=Homo sapiens PE=2 SV=1	72641	189	0.19	8(3)
E9KL35	E9KL35_HUMAN Epididymis tissue sperm binding protein Li 3a OS=Homo sapiens PE=2 SV=1	35511	188	0.56	6(5)
Q00610	CLH1_HUMAN Clathrin heavy chain 1 OS=Homo sapiens GN=CLTC PE=1 SV=5	193260	188	0.14	11(5)
Q5CAQ5	Q5CAQ5_HUMAN Tumor rejection antigen (Gp96) 1 OS=Homo sapiens GN=TRA1 PE=2 SV=1	92567	186	0.23	7(4)
Q2VIP3	Q2VIP3_HUMAN PABP3 (Fragment) OS=Homo sapiens PE=2 SV=1	70116	183	0.32	7(3)
B4DGB4	B4DGB4_HUMAN Plastin-3 OS=Homo sapiens GN=PLS3 PE=2 SV=1	69820	182	0.26	6(3)
O95036	O95036_HUMAN Similar to 60S ribosomal protein L7; similar to P18124 (PID:d133021) OS=Homo sapiens GN=WUGSC:H_RG054D04.1 PE=3 SV=1	29075	181	0.72	10(4)
B2R5M8	B2R5M8_HUMAN Isocitrate dehydrogenase [NADP] OS=Homo sapiens PE=2 SV=1	46905	180	0.4	7(3)
P45880	VDAC2_HUMAN Voltage-dependent anion-selective channel protein 2 OS=Homo sapiens GN=VDAC2 PE=1 SV=2	32060	180	0.64	5(4)
Q6I9V5	Q6I9V5_HUMAN SLC25A6 protein OS=Homo sapiens GN=SLC25A6 PE=2 SV=1	33073	180	0.61	6(4)
H0YMD0	H0YMD0_HUMAN Annexin (Fragment) OS=Homo sapiens GN=ANXA2 PE=2 SV=1	25440	179	1.37	7(3)
B2RDE1	B2RDE1_HUMAN cDNA, FLJ96568, highly similar to Homo sapiens tropomyosin 3 (TPM3), mRNA OS=Homo sapiens PE=2 SV=1	29228	176	0.54	5(3)
Q8N9Z3	Q8N9Z3_HUMAN cDNA FLJ36025 fis, clone TESTI2016701, highly similar to TUMOR NECROSIS FACTOR TYPE 1 RECEPTOR ASSOCIATED PROTEIN OS=Homo sapiens PE=2 SV=1	66290	174	0.21	5(4)
Q2TSD0	Q2TSD0_HUMAN Glyceraldehyde-3-phosphate dehydrogenase OS=Homo sapiens PE=2 SV=1	36197	173	0.55	9(3)
P22314	UBA1_HUMAN Ubiquitin-like modifier-activating enzyme 1 OS=Homo sapiens GN=UBA1 PE=1 SV=3	118858	172	0.15	6(3)
P51148	RAB5C_HUMAN Ras-related protein Rab-5C OS=Homo sapiens GN=RAB5C PE=1 SV=2	23696	172	0.49	6(4)
B2RAR6	B2RAR6_HUMAN cDNA, FLJ95068, highly similar to Homo sapiens eukaryotic translation elongation factor 1 delta (guanine nucleotide exchange protein) (EEF1D), transcript variant 1, mRNA OS=Homo sapiens PE=2 SV=1	71862	170	0.25	6(3)
B4DE59	B4DE59_HUMAN cDNA FLJ60424, highly similar to Junction plakoglobin OS=Homo sapiens PE=2 SV=1	62862	170	0.29	9(4)
Q3B770	Q3B770_HUMAN EIF3A protein (Fragment) OS=Homo sapiens GN=EIF3A PE=2 SV=1	75747	170	0.24	12(4)
Q2TU64	Q2TU64_HUMAN PIG48 OS=Homo sapiens PE=2 SV=1	61110	169	0.3	7(4)
A8K3Q9	A8K3Q9_HUMAN cDNA FLJ76611, highly similar to Homo sapiens ribosomal protein L14 (RPL14), mRNA OS=Homo sapiens PE=2 SV=1	23554	166	0.7	5(3)
B4DJI1	B4DJI1_HUMAN L-lactate dehydrogenase OS=Homo sapiens PE=2 SV=1	33857	166	0.45	5(4)
Q6FHP5	Q6FHP5_HUMAN PHB protein (Fragment) OS=Homo sapiens GN=PHB PE=2 SV=1	29871	166	0.53	7(3)
P07737	PROF1_HUMAN Profilin-1 OS=Homo sapiens GN=PFN1 PE=1 SV=2	15216	165	0.83	5(3)
P53621	COPA_HUMAN Coatomer subunit alpha OS=Homo sapiens GN=COPA PE=1 SV=2	139797	165	0.29	12(3)
B2R7T6	B2R7T6_HUMAN cDNA, FLJ93596, highly similar to Homo sapiens sulfide quinone reductase-like (yeast) (SQRDL), mRNA OS=Homo sapiens PE=2 SV=1	50199	164	0.21	5(3)
Q53HV2	Q53HV2_HUMAN Chaperonin containing TCP1, subunit 7 (Eta) variant (Fragment) OS=Homo sapiens PE=2 SV=1	59816	164	0.45	10(6)
O00410	IPO5_HUMAN Importin-5 OS=Homo sapiens GN=IPO5 PE=1 SV=4	125032	163	0.17	7(4)
A4FU77	A4FU77_HUMAN SNRNP200 protein (Fragment) OS=Homo sapiens GN=SNRNP200 PE=2 SV=1	217585	162	0.14	12(3)
B4DVY2	B4DVY2_HUMAN cDNA FLJ54184, highly similar to Tropomyosin alpha-4 chain OS=Homo sapiens PE=2 SV=1	26319	162	0.61	4(3)
E5KNY5	E5KNY5_HUMAN Leucine-rich PPR-motif containing OS=Homo sapiens GN=LRPPRC PE=2 SV=1	159003	162	0.11	7(4)
P52272	HNRPM_HUMAN Heterogeneous nuclear ribonucleoprotein M OS=Homo sapiens GN=HNRNPM PE=1 SV=3	77749	162	0.18	5(4)
B4DEX8	B4DEX8_HUMAN S-adenosylmethionine synthase OS=Homo sapiens GN=MAT2A PE=2 SV=1	40027	161	0.27	4(3)
B2R6J2	B2R6J2_HUMAN cDNA, FLJ92973, highly similar to Homo sapiens villin 2 (ezrin) (VIL2), mRNA OS=Homo sapiens PE=2 SV=1	69472	160	0.26	9(3)
B4DQJ8	B4DQJ8_HUMAN 6-phosphogluconate dehydrogenase, decarboxylating OS=Homo sapiens GN=PGD PE=2 SV=1	52352	158	0.28	9(5)
B1ANR0	B1ANR0_HUMAN Poly(A) binding protein, cytoplasmic 4 (Inducible form), isoform CRA_e OS=Homo sapiens GN=PABPC4 PE=2 SV=1	68156	157	0.33	7(2)
B3KM80	B3KM80_HUMAN Nucleolin, isoform CRA_c OS=Homo sapiens GN=NCL PE=2 SV=1	58576	157	0.31	6(5)
B3KPA6	B3KPA6_HUMAN Acyl-Coenzyme A dehydrogenase, very long chain, isoform CRA_e OS=Homo sapiens GN=ACADVL PE=2 SV=1	62941	157	0.36	9(2)
Q53SS8	Q53SS8_HUMAN Poly(RC) binding protein 1 OS=Homo sapiens GN=PCBP1 PE=2 SV=1	37987	157	0.4	6(4)
A8MUD9	A8MUD9_HUMAN 60S ribosomal protein L7 OS=Homo sapiens GN=RPL7 PE=2 SV=1	24474	156	0.29	6(3)
P38919	IF4A3_HUMAN Eukaryotic initiation factor 4A-III OS=Homo sapiens GN=EIF4A3 PE=1 SV=4	47126	156	0.84	12(4)
A8K134	A8K134_HUMAN cDNA FLJ75245, highly similar to Homo sapiens carbamoyl-phosphate synthetase 1, mitochondrial (CPS1), mRNA OS=Homo sapiens PE=2 SV=1	165961	155	0.19	12(1)
O43175	SERA_HUMAN D-3-phosphoglycerate dehydrogenase OS=Homo sapiens GN=PHGDH PE=1 SV=4	57356	155	0.32	6(3)
B4DLN6	B4DLN6_HUMAN cDNA FLJ59033, highly similar to Protein disulfide-isomerase (EC 5.3.4.1) OS=Homo sapiens PE=2 SV=1	51555	152	0.54	10(4)
K7EK77	K7EK77_HUMAN ATP synthase subunit alpha, mitochondrial (Fragment) OS=Homo sapiens GN=ATP5A1 PE=3 SV=1	22243	152	0.76	6(3)
O75533	SF3B1_HUMAN Splicing factor 3B subunit 1 OS=Homo sapiens GN=SF3B1 PE=1 SV=3	146479	152	0.09	5(3)
P23284	PPIB_HUMAN Peptidyl-prolyl cis-trans isomerase B OS=Homo sapiens GN=PPIB PE=1 SV=2	23785	152	0.93	7(4)
B3KSI4	B3KSI4_HUMAN cDNA FLJ36348 fis, clone THYMU2007025, highly similar to TRANSKETOLASE (EC 2.2.1.1) OS=Homo sapiens PE=2 SV=1	59571	149	0.46	9(3)
Q59EG8	Q59EG8_HUMAN Proteasome 26S non-ATPase subunit 2 variant (Fragment) OS=Homo sapiens PE=2 SV=1	101322	149	0.21	8(3)
Q0VGD6	Q0VGD6_HUMAN HNRPR protein (Fragment) OS=Homo sapiens GN=HNRPR PE=2 SV=1	68218	148	0.21	8(3)
Q08211	DHX9_HUMAN ATP-dependent RNA helicase A OS=Homo sapiens GN=DHX9 PE=1 SV=4	142181	146	0.1	6(5)
Q53G83	Q53G83_HUMAN Ribosomal protein S3 variant (Fragment) OS=Homo sapiens PE=2 SV=1	26843	146	0.6	8(3)
Q04917	1433F_HUMAN 14-3-3 protein eta OS=Homo sapiens GN=YWHAH PE=1 SV=4	28372	145	0.39	9(4)
B4DRH6	B4DRH6_HUMAN cDNA FLJ54509, highly similar to Trifunctional enzyme subunit alpha, mitochondrial OS=Homo sapiens PE=2 SV=1	79007	143	0.23	5(3)
Q92973	TNPO1_HUMAN Transportin-1 OS=Homo sapiens GN=TNPO1 PE=1 SV=2	103771	143	0.24	9(3)
P31947	1433S_HUMAN 14-3-3 protein sigma OS=Homo sapiens GN=SFN PE=1 SV=1	27871	142	0.4	9(3)
B5BTY4	B5BTY4_HUMAN ATP-dependent RNA helicase DDX3X OS=Homo sapiens GN=DDX3X PE=2 SV=1	73525	141	0.24	8(3)
Q52NV4	Q52NV4_HUMAN Histidyl-tRNA synthetase OS=Homo sapiens GN=HRS PE=2 SV=1	57930	139	0.39	7(3)
M0QZM1	M0QZM1_HUMAN Heterogeneous nuclear ribonucleoprotein M (Fragment) OS=Homo sapiens GN=HNRNPM PE=4 SV=1	40017	138	0.17	2(2)
P61204	ARF3_HUMAN ADP-ribosylation factor 3 OS=Homo sapiens GN=ARF3 PE=1 SV=2	20645	136	0.57	4(2)
Q01650	LAT1_HUMAN Large neutral amino acids transporter small subunit 1 OS=Homo sapiens GN=SLC7A5 PE=1 SV=2	55659	136	0.12	4(2)
F8W8J4	F8W8J4_HUMAN Myoferlin OS=Homo sapiens GN=MYOF PE=2 SV=1	236041	135	0.1	9(3)
P27348	1433T_HUMAN 14-3-3 protein theta OS=Homo sapiens GN=YWHAQ PE=1 SV=1	28032	135	0.4	5(2)
Q9BW34	Q9BW34_HUMAN EEF1D protein (Fragment) OS=Homo sapiens GN=EEF1D PE=2 SV=2	61244	135	0.23	4(2)
A8K8U1	A8K8U1_HUMAN cDNA FLJ77762, highly similar to Homo sapiens cullin-associated and neddylation-dissociated 1 (CAND1), mRNA OS=Homo sapiens PE=2 SV=1	137941	134	0.21	9(2)
P26038	MOES_HUMAN Moesin OS=Homo sapiens GN=MSN PE=1 SV=3	67892	133	0.27	9(2)
K9MS24	K9MS24_HUMAN Beta-spectrin non-erythrocytic 1 OS=Homo sapiens GN=SPTBN1 PE=2 SV=1	275046	131	0.09	9(1)
Q1RMG2	Q1RMG2_HUMAN Adenosylhomocysteinase OS=Homo sapiens GN=AHCY PE=2 SV=1	34188	131	0.32	3(3)
Q96IF9	Q96IF9_HUMAN VCP protein (Fragment) OS=Homo sapiens GN=VCP PE=2 SV=2	71534	131	0.43	9(2)
B2RCM2	B2RCM2_HUMAN cDNA, FLJ96156, highly similar to Homo sapiens leucyl-tRNA synthetase (LARS), mRNA OS=Homo sapiens PE=2 SV=1	135550	130	0.15	6(3)
B4DFL1	B4DFL1_HUMAN Dihydrolipoyl dehydrogenase OS=Homo sapiens PE=2 SV=1	49381	130	0.29	4(2)
P28074	PSB5_HUMAN Proteasome subunit beta type-5 OS=Homo sapiens GN=PSMB5 PE=1 SV=3	28633	130	0.39	4(3)
A8K6A2	A8K6A2_HUMAN cDNA FLJ77317, highly similar to Homo sapiens retinoblastoma binding protein 7 (RBBP7), mRNA OS=Homo sapiens PE=2 SV=1	48150	129	0.14	4(3)
B4DE36	B4DE36_HUMAN Glucose-6-phosphate isomerase OS=Homo sapiens PE=2 SV=1	60376	129	0.24	8(3)
Q6FHQ0	Q6FHQ0_HUMAN RBBP7 protein (Fragment) OS=Homo sapiens GN=RBBP7 PE=2 SV=1	48132	129	0.14	4(3)
Q6P2Q9	PRP8_HUMAN Pre-mRNA-processing-splicing factor 8 OS=Homo sapiens GN=PRPF8 PE=1 SV=2	274738	129	0.07	7(2)
F5GWQ3	F5GWQ3_HUMAN Gamma-enolase OS=Homo sapiens GN=ENO2 PE=2 SV=1	13396	128	0.97	4(3)
A8K2Y2	A8K2Y2_HUMAN cDNA FLJ78120, highly similar to Homo sapiens eukaryotic translation initiation factor 2, subunit 3 gamma, 52kDa (EIF2S3), mRNA OS=Homo sapiens PE=2 SV=1	51648	127	0.54	8(2)
A8K529	A8K529_HUMAN cDNA FLJ76184, highly similar to Homo sapiens NOL1/NOP2/Sun domain family, member 2 (NSUN2), mRNA OS=Homo sapiens PE=2 SV=1	87142	127	0.25	7(3)
P49411	EFTU_HUMAN Elongation factor Tu, mitochondrial OS=Homo sapiens GN=TUFM PE=1 SV=2	49852	127	0.29	5(4)
Q2NL95	Q2NL95_HUMAN DDX19B protein (Fragment) OS=Homo sapiens GN=DDX19B PE=2 SV=1	51068	127	0.46	7(2)
Q6IBT3	Q6IBT3_HUMAN CCT7 protein OS=Homo sapiens GN=CCT7 PE=2 SV=1	59804	127	0.24	6(2)
A0PJ62	A0PJ62_HUMAN RPL14 protein (Fragment) OS=Homo sapiens GN=RPL14 PE=2 SV=1	14716	126	1.29	5(2)
B4E1G2	B4E1G2_HUMAN Serine hydroxymethyltransferase OS=Homo sapiens PE=2 SV=1	49630	126	0.67	10(2)
Q60FE2	Q60FE2_HUMAN MYH9 variant protein OS=Homo sapiens GN=MYH9 PE=2 SV=1	227646	126	0.1	8(3)
M0QZL1	M0QZL1_HUMAN Flavin reductase (NADPH) OS=Homo sapiens GN=BLVRB PE=4 SV=1	15888	123	0.47	3(1)
B4E022	B4E022_HUMAN Transketolase OS=Homo sapiens GN=TKT PE=2 SV=1	63410	122	0.35	8(3)
G8JLB6	G8JLB6_HUMAN Heterogeneous nuclear ribonucleoprotein H OS=Homo sapiens GN=HNRNPH1 PE=2 SV=1	51482	122	0.13	5(3)
P13929	ENOB_HUMAN Beta-enolase OS=Homo sapiens GN=ENO3 PE=1 SV=5	47299	122	0.22	3(2)
A8K6V3	A8K6V3_HUMAN cDNA FLJ78677, highly similar to Homo sapiens splicing factor 3b, subunit 3, 130kDa (SF3B3), mRNA OS=Homo sapiens PE=2 SV=1	136576	121	0.13	6(3)
B4DNL5	B4DNL5_HUMAN cDNA FLJ59361, highly similar to Protein disulfide-isomerase (EC 5.3.4.1) OS=Homo sapiens PE=2 SV=1	55746	121	0.41	6(3)
B4DX78	B4DX78_HUMAN cDNA FLJ55484, highly similar to ATP-dependent RNA helicase DDX39 (EC 3.6.1.-) OS=Homo sapiens PE=2 SV=1	54176	121	0.19	6(3)
F5GX33	F5GX33_HUMAN Calcium-binding mitochondrial carrier protein Aralar2 OS=Homo sapiens GN=SLC25A13 PE=2 SV=1	62548	121	0.29	5(3)
P21796	VDAC1_HUMAN Voltage-dependent anion-selective channel protein 1 OS=Homo sapiens GN=VDAC1 PE=1 SV=2	30868	121	0.36	4(3)
Q9UBB4	ATX10_HUMAN Ataxin-10 OS=Homo sapiens GN=ATXN10 PE=1 SV=1	54196	121	0.27	7(3)
A8MXP9	A8MXP9_HUMAN Matrin-3 OS=Homo sapiens GN=MATR3 PE=2 SV=1	100419	118	0.1	3(2)
B4DKE6	B4DKE6_HUMAN cDNA FLJ60629, highly similar to Replication factor C subunit 3 OS=Homo sapiens PE=2 SV=1	35551	118	0.2	2(2)
B3KRS7	B3KRS7_HUMAN cDNA FLJ34844 fis, clone NT2NE2011154, highly similar to RuvB-like 1 OS=Homo sapiens PE=2 SV=1	34946	117	0.31	4(3)
B4DDB6	B4DDB6_HUMAN Heterogeneous nuclear ribonucleoprotein A3, isoform CRA_a OS=Homo sapiens GN=HNRPA3 PE=2 SV=1	37234	117	0.19	4(3)
B4DR63	B4DR63_HUMAN 26S protease regulatory subunit 4 OS=Homo sapiens GN=PSMC1 PE=2 SV=1	41255	117	0.26	6(1)
H0YIZ0	H0YIZ0_HUMAN Serine hydroxymethyltransferase (Fragment) OS=Homo sapiens GN=SHMT2 PE=3 SV=1	28971	117	0.72	5(4)
P53004	BIEA_HUMAN Biliverdin reductase A OS=Homo sapiens GN=BLVRA PE=1 SV=2	33692	117	0.46	4(3)
Q9Y5M8	SRPRB_HUMAN Signal recognition particle receptor subunit beta OS=Homo sapiens GN=SRPRB PE=1 SV=3	29912	117	0.53	4(2)
P51149	RAB7A_HUMAN Ras-related protein Rab-7a OS=Homo sapiens GN=RAB7A PE=1 SV=1	23760	116	0.93	5(3)
Q06830	PRDX1_HUMAN Peroxiredoxin-1 OS=Homo sapiens GN=PRDX1 PE=1 SV=1	22324	116	1.01	7(2)
Q9BUP3	HTAI2_HUMAN Oxidoreductase HTATIP2 OS=Homo sapiens GN=HTATIP2 PE=1 SV=2	27260	116	0.78	6(3)
B4DLT2	B4DLT2_HUMAN cDNA FLJ56637, highly similar to Nuclear pore complex protein Nup155 OS=Homo sapiens PE=2 SV=1	152734	115	0.07	5(2)
Q2TU78	Q2TU78_HUMAN Proliferation-inducing protein 45 OS=Homo sapiens GN=PIG45 PE=2 SV=1	20741	115	0.35	3(3)
Q4LE36	Q4LE36_HUMAN ACLY variant protein (Fragment) OS=Homo sapiens GN=ACLY variant protein PE=2 SV=1	125389	115	0.17	12(3)
Q5JWV8	Q5JWV8_HUMAN Acyl-CoA synthetase long-chain family member 4, isoform CRA_b OS=Homo sapiens GN=ACSL4 PE=2 SV=1	75471	115	0.14	4(2)
B0V043	B0V043_HUMAN Valine--tRNA ligase OS=Homo sapiens GN=VARS PE=2 SV=1	141632	114	0.07	3(2)
B4DJ63	B4DJ63_HUMAN Serine hydroxymethyltransferase OS=Homo sapiens PE=2 SV=1	41859	114	0.46	5(4)
Q9H9B4	SFXN1_HUMAN Sideroflexin-1 OS=Homo sapiens GN=SFXN1 PE=1 SV=4	35881	114	0.3	3(3)
D3DTL4	D3DTL4_HUMAN Enolase OS=Homo sapiens GN=ENO3 PE=2 SV=1	37167	113	0.09	3(1)
F2Z393	F2Z393_HUMAN Transaldolase OS=Homo sapiens GN=TALDO1 PE=2 SV=1	35535	113	0.31	4(1)
D3DQA6	D3DQA6_HUMAN DEAD (Asp-Glu-Ala-Asp) box polypeptide 46, isoform CRA_a OS=Homo sapiens GN=DDX46 PE=3 SV=1	100958	112	0.1	3(3)
E9PG35	E9PG35_HUMAN Methylcrotonoyl-CoA carboxylase subunit alpha, mitochondrial (Fragment) OS=Homo sapiens GN=MCCC1 PE=2 SV=1	66882	112	0.21	4(2)
G3V5L0	G3V5L0_HUMAN Serine hydroxymethyltransferase, mitochondrial (Fragment) OS=Homo sapiens GN=SHMT2 PE=2 SV=1	24178	112	0.3	2(2)
H0YL69	H0YL69_HUMAN Proteasome subunit alpha type (Fragment) OS=Homo sapiens GN=PSMA4 PE=2 SV=1	26645	111	0.42	6(4)
J3KPM9	J3KPM9_HUMAN Signal transducer and activator of transcription 1-alpha/beta OS=Homo sapiens GN=STAT1 PE=4 SV=1	83878	111	0.21	5(2)
M0R261	M0R261_HUMAN 6-phosphogluconolactonase (Fragment) OS=Homo sapiens GN=PGLS PE=4 SV=1	23210	110	0.31	4(3)
Q13011	ECH1_HUMAN Delta(3,5)-Delta(2,4)-dienoyl-CoA isomerase, mitochondrial OS=Homo sapiens GN=ECH1 PE=1 SV=2	36136	110	0.42	7(2)
B2RDW1	B2RDW1_HUMAN Ribosomal protein S27a, isoform CRA_c OS=Homo sapiens GN=RPS27A PE=2 SV=1	18296	109	0.4	3(3)
B4DF68	B4DF68_HUMAN cDNA FLJ55325, highly similar to Heat-shock protein 105 kDa OS=Homo sapiens PE=2 SV=1	86500	109	0.12	4(2)
B4DNN3	B4DNN3_HUMAN cDNA FLJ54453, highly similar to Glutaminyl-tRNA synthetase (EC 6.1.1.18) OS=Homo sapiens PE=2 SV=1	83048	109	0.21	5(4)
J3QRD1	J3QRD1_HUMAN Fatty aldehyde dehydrogenase OS=Homo sapiens GN=ALDH3A2 PE=3 SV=1	45019	109	0.24	4(2)
P27816	MAP4_HUMAN Microtubule-associated protein 4 OS=Homo sapiens GN=MAP4 PE=1 SV=3	121443	108	0.08	3(3)
Q05D08	Q05D08_HUMAN PA2G4 protein (Fragment) OS=Homo sapiens GN=PA2G4 PE=2 SV=1	45579	108	0.42	7(2)
Q53G91	Q53G91_HUMAN Solute carrier family 16, member 3 variant (Fragment) OS=Homo sapiens PE=2 SV=1	50078	108	0.14	4(2)
Q53XM7	Q53XM7_HUMAN VAMP (Vesicle-associated membrane protein)-associated protein B and C OS=Homo sapiens GN=VAPB PE=2 SV=1	27439	107	0.26	3(2)
Q75L23	Q75L23_HUMAN Putative uncharacterized protein PSMC2 (Fragment) OS=Homo sapiens GN=PSMC2 PE=2 SV=1	46202	107	0.41	8(3)
P31930	QCR1_HUMAN Cytochrome b-c1 complex subunit 1, mitochondrial OS=Homo sapiens GN=UQCRC1 PE=1 SV=3	53297	106	0.27	4(3)
B7Z4B2	B7Z4B2_HUMAN cDNA FLJ56108, highly similar to Puromycin-sensitive aminopeptidase (EC 3.4.11.-) OS=Homo sapiens PE=2 SV=1	93434	105	0.15	4(2)
P25786	PSA1_HUMAN Proteasome subunit alpha type-1 OS=Homo sapiens GN=PSMA1 PE=1 SV=1	29822	105	0.37	9(2)
B4DY28	B4DY28_HUMAN cDNA FLJ61189, highly similar to Cysteine and glycine-rich protein 1 OS=Homo sapiens PE=2 SV=1	20884	104	0.56	3(1)
E9PS68	E9PS68_HUMAN Pyruvate carboxylase, mitochondrial OS=Homo sapiens GN=PC PE=2 SV=1	32767	104	0.21	3(1)
J3KQE5	J3KQE5_HUMAN GTP-binding nuclear protein Ran (Fragment) OS=Homo sapiens GN=RAN PE=4 SV=1	27027	104	0.26	4(4)
P17987	TCPA_HUMAN T-complex protein 1 subunit alpha OS=Homo sapiens GN=TCP1 PE=1 SV=1	60819	104	0.37	8(2)
Q0QD40	Q0QD40_HUMAN Retinol dehydrogenase 11 (Fragment) OS=Homo sapiens GN=RDH11 PE=2 SV=1	18929	104	0.39	2(1)
Q15149-4	PLEC_HUMAN Isoform 4 of Plectin OS=Homo sapiens GN=PLEC	517822	104	0.04	9(2)
B4DH02	B4DH02_HUMAN cDNA FLJ50510, highly similar to Heat shock 70 kDa protein 4 OS=Homo sapiens PE=2 SV=1	95157	102	0.11	4(2)
Q5U0A0	Q5U0A0_HUMAN Proteasome subunit alpha type OS=Homo sapiens PE=2 SV=1	26579	102	0.61	4(3)
A8K525	A8K525_HUMAN cDNA FLJ76817, highly similar to Homo sapiens non-POU domain containing, octamer-binding (NONO), mRNA OS=Homo sapiens PE=2 SV=1	54367	101	0.12	4(3)
B4DTA6	B4DTA6_HUMAN cDNA FLJ57794, moderately similar to Ras-related protein Rab-35 OS=Homo sapiens PE=2 SV=1	17779	101	0.42	4(3)
B7Z7P8	B7Z7P8_HUMAN Eukaryotic peptide chain release factor subunit 1 OS=Homo sapiens GN=ETF1 PE=2 SV=1	47731	101	0.31	4(1)
G5ELZ5	G5ELZ5_HUMAN Ras-related protein Rab-15 isoform AN2 OS=Homo sapiens GN=RAB15 PE=4 SV=1	13887	101	0.55	4(3)
Q5U0I6	Q5U0I6_HUMAN RAB1A protein OS=Homo sapiens GN=RAB1A PE=2 SV=1	22891	101	0.31	5(3)
B4DUT7	B4DUT7_HUMAN cDNA FLJ57604, highly similar to GMP synthase (glutamine-hydrolyzing) (EC 6.3.5.2) OS=Homo sapiens PE=2 SV=1	71880	100	0.25	5(1)
B4DXT2	B4DXT2_HUMAN cDNA FLJ59635, highly similar to Heat shock 70 kDa protein 4L OS=Homo sapiens PE=2 SV=1	92794	100	0.07	3(2)
Q7L4M3	Q7L4M3_HUMAN KRT8 protein OS=Homo sapiens PE=2 SV=1	30802	100	0.36	5(3)
B2R5P6	B2R5P6_HUMAN Thioredoxin reductase 1, cytoplasmic OS=Homo sapiens GN=TXNRD1 PE=2 SV=1	55253	99	0.26	6(2)
D6RA82	D6RA82_HUMAN Annexin OS=Homo sapiens GN=ANXA3 PE=2 SV=1	32270	99	0.34	3(3)
H0YLR3	H0YLR3_HUMAN U2 small nuclear ribonucleoprotein A~ (Fragment) OS=Homo sapiens GN=SNRPA1 PE=2 SV=1	9472	99	0.87	3(2)
G3V0E5	G3V0E5_HUMAN Transferrin receptor (P90, CD71), isoform CRA_c OS=Homo sapiens GN=TFRC PE=2 SV=1	76259	98	0.13	4(2)
Q4ZG57	Q4ZG57_HUMAN Putative uncharacterized protein MCM6 (Fragment) OS=Homo sapiens GN=MCM6 PE=2 SV=1	89803	98	0.11	3(2)
B4DVE7	B4DVE7_HUMAN Annexin OS=Homo sapiens GN=ANXA11 PE=2 SV=1	51552	97	0.45	6(2)
Q53G74	Q53G74_HUMAN Ribosomal protein L4 variant (Fragment) OS=Homo sapiens PE=2 SV=1	47974	96	0.22	5(2)
Q92945	FUBP2_HUMAN Far upstream element-binding protein 2 OS=Homo sapiens GN=KHSRP PE=1 SV=4	73355	96	0.19	5(2)
B2R7P8	B2R7P8_HUMAN cDNA, FLJ93545, highly similar to Homo sapiens 5-aminoimidazole-4-carboxamide ribonucleotide formyltransferase/IMP cyclohydrolase (ATIC), mRNA OS=Homo sapiens PE=2 SV=1	65108	95	0.34	6(2)
B2ZZ90	B2ZZ90_HUMAN Acetyl-Coenzyme A carboxylase alpha OS=Homo sapiens GN=ACACA PE=2 SV=1	267095	95	0.08	6(2)
B4DVB8	B4DVB8_HUMAN ELAV-like protein 1 OS=Homo sapiens GN=ELAVL1 PE=2 SV=1	39200	95	0.28	3(2)
G1UI16	G1UI16_HUMAN SCC-112 protein, isoform CRA_b OS=Homo sapiens GN=PDS5A PE=2 SV=1	152274	95	0.04	4(2)
J3KPF3	J3KPF3_HUMAN 4F2 cell-surface antigen heavy chain OS=Homo sapiens GN=SLC3A2 PE=4 SV=1	68230	95	0.15	3(1)
P24752	THIL_HUMAN Acetyl-CoA acetyltransferase, mitochondrial OS=Homo sapiens GN=ACAT1 PE=1 SV=1	45456	95	0.32	4(2)
P55060	XPO2_HUMAN Exportin-2 OS=Homo sapiens GN=CSE1L PE=1 SV=3	111145	95	0.19	9(2)
F5H0C8	F5H0C8_HUMAN Enolase OS=Homo sapiens GN=ENO2 PE=2 SV=1	35026	94	0.2	4(2)
O95373	IPO7_HUMAN Importin-7 OS=Homo sapiens GN=IPO7 PE=1 SV=1	120751	94	0.11	4(2)
P54577	SYYC_HUMAN Tyrosine--tRNA ligase, cytoplasmic OS=Homo sapiens GN=YARS PE=1 SV=4	59448	94	0.38	7(1)
Q2VPA0	Q2VPA0_HUMAN Lon protease homolog (Fragment) OS=Homo sapiens GN=LONP1 PE=2 SV=1	95436	94	0.11	4(1)
H0Y8T4	H0Y8T4_HUMAN Matrin-3 (Fragment) OS=Homo sapiens GN=MATR3 PE=4 SV=1	38104	93	0.28	3(2)
H0YK49	H0YK49_HUMAN Electron transfer flavoprotein subunit alpha, mitochondrial OS=Homo sapiens GN=ETFA PE=2 SV=1	24259	93	0.29	2(1)
H0Y8L7	H0Y8L7_HUMAN 40S ribosomal protein S3a (Fragment) OS=Homo sapiens GN=RPS3A PE=2 SV=1	22294	92	0.52	4(2)
P10696	PPBN_HUMAN Alkaline phosphatase, placental-like OS=Homo sapiens GN=ALPPL2 PE=1 SV=4	57626	92	0.12	3(1)
Q59GE4	Q59GE4_HUMAN Ribosomal protein S10 variant (Fragment) OS=Homo sapiens PE=4 SV=1	19961	92	0.37	2(1)
Q9UJZ2	Q9UJZ2_HUMAN Cytovillin 2 (Fragment) OS=Homo sapiens GN=VIL2 PE=2 SV=1	18464	92	0.4	5(1)
A4D1M6	A4D1M6_HUMAN HCG19809 OS=Homo sapiens GN=LOC392793 PE=3 SV=1	25046	91	0.65	5(1)
E2QRB3	E2QRB3_HUMAN Pyrroline-5-carboxylate reductase 1, isoform CRA_c OS=Homo sapiens GN=PYCR1 PE=4 SV=2	30422	91	0.23	3(2)
F8VS02	F8VS02_HUMAN Alpha-aminoadipic semialdehyde dehydrogenase OS=Homo sapiens GN=ALDH7A1 PE=2 SV=1	51949	91	0.13	2(2)
A1JUI8	A1JUI8_HUMAN Chaperonin subunit 6A (Fragment) OS=Homo sapiens GN=CCT6A PE=2 SV=1	54103	90	0.34	8(3)
B2R806	B2R806_HUMAN Eukaryotic translation initiation factor 3 subunit E OS=Homo sapiens GN=EIF3E PE=2 SV=1	52622	90	0.2	3(2)
B4YAH7	B4YAH7_HUMAN ALDH2 (Fragment) OS=Homo sapiens GN=ALDH2 PE=2 SV=1	26844	90	0.8	5(2)
B7Z3V1	B7Z3V1_HUMAN cDNA FLJ60077, highly similar to Sodium/potassium-transporting ATPase alpha-1 chain (EC 3.6.3.9) (Fragment) OS=Homo sapiens PE=2 SV=1	113791	90	0.12	5(1)
P14868	SYDC_HUMAN Aspartate--tRNA ligase, cytoplasmic OS=Homo sapiens GN=DARS PE=1 SV=2	57499	90	0.25	7(1)
Q06210	GFPT1_HUMAN Glutamine--fructose-6-phosphate aminotransferase [isomerizing] 1 OS=Homo sapiens GN=GFPT1 PE=1 SV=3	79555	90	0.08	2(2)
Q5U077	Q5U077_HUMAN L-lactate dehydrogenase OS=Homo sapiens GN=LDHB PE=2 SV=1	36900	90	0.29	3(1)
A6NG51	A6NG51_HUMAN Spectrin alpha chain, non-erythrocytic 1 OS=Homo sapiens GN=SPTAN1 PE=2 SV=2	285628	89	0.03	4(2)
B4DWK8	B4DWK8_HUMAN Catalase OS=Homo sapiens PE=2 SV=1	53482	89	0.13	2(1)
E9PG15	E9PG15_HUMAN 14-3-3 protein theta (Fragment) OS=Homo sapiens GN=YWHAQ PE=2 SV=1	17209	89	0.43	3(1)
H0Y9Y4	H0Y9Y4_HUMAN 40S ribosomal protein S3a (Fragment) OS=Homo sapiens GN=RPS3A PE=2 SV=1	23628	89	0.7	5(2)
P08758	ANXA5_HUMAN Annexin A5 OS=Homo sapiens GN=ANXA5 PE=1 SV=2	35971	89	0.42	4(2)
A2A3R6	A2A3R6_HUMAN 40S ribosomal protein S6 OS=Homo sapiens GN=RPS6 PE=2 SV=1	28834	88	0.24	4(2)
A4ZU86	A4ZU86_HUMAN Truncated nucleolar phosphoprotein B23 OS=Homo sapiens GN=NPM1 PE=2 SV=1	30074	88	0.11	1(1)
B4DVY1	B4DVY1_HUMAN Eukaryotic translation initiation factor 3 subunit D OS=Homo sapiens GN=EIF3D PE=2 SV=1	58731	88	0.12	2(2)
B5MCT8	B5MCT8_HUMAN 40S ribosomal protein S9 OS=Homo sapiens GN=RPS9 PE=2 SV=1	16674	88	0.74	5(3)
B7Z3K9	B7Z3K9_HUMAN Fructose-bisphosphate aldolase OS=Homo sapiens PE=2 SV=1	49062	87	0.14	3(2)
H0YL72	H0YL72_HUMAN Isocitrate dehydrogenase [NAD] subunit alpha, mitochondrial OS=Homo sapiens GN=IDH3A PE=2 SV=1	36162	87	0.19	2(2)
P11021	GRP78_HUMAN 78 kDa glucose-regulated protein OS=Homo sapiens GN=HSPA5 PE=1 SV=2	72402	87	0.14	6(3)
H0YHX9	H0YHX9_HUMAN Nascent polypeptide-associated complex subunit alpha (Fragment) OS=Homo sapiens GN=NACA PE=2 SV=1	22930	86	0.31	2(1)
Q15046	SYK_HUMAN Lysine--tRNA ligase OS=Homo sapiens GN=KARS PE=1 SV=3	68461	86	0.21	5(3)
Q5VVD0	Q5VVD0_HUMAN Ribosomal protein L11, isoform CRA_b OS=Homo sapiens GN=RPL11 PE=2 SV=1	20468	86	0.36	3(2)
B2R4K7	B2R4K7_HUMAN 60S ribosomal protein L6 OS=Homo sapiens PE=2 SV=1	32739	85	0.34	4(2)
B3KQ25	B3KQ25_HUMAN Proteasome activator complex subunit 3 OS=Homo sapiens GN=PSME3 PE=2 SV=1	22555	85	0.32	3(2)
B4DUL5	B4DUL5_HUMAN cDNA FLJ51625, highly similar to Ubiquinol-cytochrome-c reductase complex coreprotein I, mitochondrial (EC 1.10.2.2) OS=Homo sapiens PE=2 SV=1	40917	85	0.17	3(2)
B5BUB1	B5BUB1_HUMAN RuvB-like 1 (Fragment) OS=Homo sapiens GN=RUVBL1 PE=2 SV=1	50526	85	0.21	5(2)
G3V3R6	G3V3R6_HUMAN Galectin-3 OS=Homo sapiens GN=LGALS3 PE=2 SV=1	24128	85	0.48	4(1)
H7C3A1	H7C3A1_HUMAN Serrate RNA effector molecule homolog (Fragment) OS=Homo sapiens GN=SRRT PE=2 SV=1	57154	85	0.12	3(2)
J3KN67	J3KN67_HUMAN Tropomyosin alpha-3 chain OS=Homo sapiens GN=TPM3 PE=3 SV=1	33430	85	0.21	3(2)
Q12904	AIMP1_HUMAN Aminoacyl tRNA synthase complex-interacting multifunctional protein 1 OS=Homo sapiens GN=AIMP1 PE=1 SV=2	34616	85	0.2	2(2)
B3KT34	B3KT34_HUMAN cDNA FLJ37560 fis, clone BRCOC2000333, highly similar to Succinate dehydrogenase (ubiquinone) flavoprotein subunit, mitochondrial (EC 1.3.5.1) OS=Homo sapiens PE=2 SV=1	48925	84	0.3	6(1)
B3KTS5	B3KTS5_HUMAN cDNA FLJ38670 fis, clone HSYRA2000190, highly similar to Voltage-dependent anion-selective channel protein 1 OS=Homo sapiens PE=2 SV=1	30839	84	0.23	2(1)
B4DH16	B4DH16_HUMAN cDNA FLJ54709, highly similar to Methylcrotonoyl-CoA carboxylase subunit alpha, mitochondrial (EC 6.4.1.4) OS=Homo sapiens PE=2 SV=1	47761	84	0.22	4(2)
B4DLV7	B4DLV7_HUMAN cDNA FLJ60299, highly similar to Rab GDP dissociation inhibitor beta OS=Homo sapiens PE=2 SV=1	51577	84	0.28	10(1)
Q4W4Y1	Q4W4Y1_HUMAN Dopamine receptor interacting protein 4 OS=Homo sapiens GN=DRIP4 PE=2 SV=1	96646	84	0.11	6(2)
Q5JR94	Q5JR94_HUMAN 40S ribosomal protein S8 OS=Homo sapiens GN=RPS8 PE=2 SV=1	24475	84	0.29	2(2)
Q9UHD8-3	SEPT9_HUMAN Isoform 3 of Septin-9 OS=Homo sapiens GN=SEPT9	47756	84	0.31	4(2)
A1A508	A1A508_HUMAN PRSS3 protein OS=Homo sapiens GN=PRSS3 PE=2 SV=1	27040	83	0.26	2(2)
C9JAK5	C9JAK5_HUMAN ADP-ribosylation factor 4 OS=Homo sapiens GN=ARF4 PE=2 SV=1	17802	83	0.42	3(2)
K7EIV0	K7EIV0_HUMAN Calpain small subunit 1 OS=Homo sapiens GN=CAPNS1 PE=4 SV=1	21970	83	0.15	1(1)
Q0VAS5	Q0VAS5_HUMAN Histone H4 OS=Homo sapiens GN=HIST1H4H PE=3 SV=1	11364	83	0.3	3(2)
Q3BDU5	Q3BDU5_HUMAN Rhabdomyosarcoma antigen MU-RMS-40.12 OS=Homo sapiens PE=2 SV=1	55605	83	0.19	4(1)
B4DHQ3	B4DHQ3_HUMAN cDNA FLJ56437, highly similar to Phosphoserine aminotransferase (EC 2.6.1.52) OS=Homo sapiens PE=2 SV=1	45783	82	0.23	4(1)
B4DL99	B4DL99_HUMAN cDNA FLJ51740, highly similar to Dolichyl-diphosphooligosaccharide--proteinglycosyltransferase 67 kDa subunit (EC 2.4.1.119) OS=Homo sapiens PE=2 SV=1	65968	82	0.16	3(2)
H0YHL6	H0YHL6_HUMAN Methionine--tRNA ligase, cytoplasmic (Fragment) OS=Homo sapiens GN=MARS PE=2 SV=1	8869	82	0.39	1(1)
P24928	RPB1_HUMAN DNA-directed RNA polymerase II subunit RPB1 OS=Homo sapiens GN=POLR2A PE=1 SV=2	218408	82	0.06	4(1)
E5RGH4	E5RGH4_HUMAN Heterogeneous nuclear ribonucleoprotein H (Fragment) OS=Homo sapiens GN=HNRNPH1 PE=2 SV=1	11231	81	0.71	2(1)
P46781	RS9_HUMAN 40S ribosomal protein S9 OS=Homo sapiens GN=RPS9 PE=1 SV=3	22635	81	0.99	7(2)
B2RBP3	B2RBP3_HUMAN cDNA, FLJ95615, highly similar to Homo sapiens ubiquitin-activating enzyme E1C (UBA3 homolog, yeast)(UBE1C), mRNA OS=Homo sapiens PE=2 SV=1	52474	80	0.06	1(1)
P18124	RL7_HUMAN 60S ribosomal protein L7 OS=Homo sapiens GN=RPL7 PE=1 SV=1	29264	80	0.38	5(2)
P30041	PRDX6_HUMAN Peroxiredoxin-6 OS=Homo sapiens GN=PRDX6 PE=1 SV=3	25133	80	0.28	2(2)
Q05DH1	Q05DH1_HUMAN Proteasome subunit alpha type (Fragment) OS=Homo sapiens GN=PSMA7 PE=2 SV=1	26868	80	0.6	6(1)
Q6FGJ9	Q6FGJ9_HUMAN GSTM3 protein OS=Homo sapiens GN=GSTM3 PE=2 SV=1	26998	80	0.42	4(2)
B3KT66	B3KT66_HUMAN Proteasome (Prosome, macropain) 26S subunit, non-ATPase, 6, isoform CRA_c OS=Homo sapiens GN=PSMD6 PE=2 SV=1	40600	79	0.26	3(2)
B3KTA3	B3KTA3_HUMAN Fascin OS=Homo sapiens PE=2 SV=1	52814	79	0.35	6(2)
B4DPZ3	B4DPZ3_HUMAN cDNA FLJ53290, highly similar to Cytoplasmic dynein 1 intermediate chain 2 OS=Homo sapiens PE=2 SV=1	70869	79	0.15	3(1)
F8VPD4	F8VPD4_HUMAN DNA fragmentation factor subunit beta OS=Homo sapiens GN=CAD PE=2 SV=1	238097	79	0.06	7(2)
P09543	CN37_HUMAN 2~,3~-cyclic-nucleotide 3~-phosphodiesterase OS=Homo sapiens GN=CNP PE=1 SV=2	47948	79	0.3	4(2)
B2ZZ89	B2ZZ89_HUMAN Spectrin beta non-erythrocytic 1 OS=Homo sapiens GN=SPTBN1 PE=2 SV=1	275237	78	0.05	4(1)
B4DP06	B4DP06_HUMAN cDNA FLJ57133, highly similar to Bifunctional purine biosynthesis protein PURH OS=Homo sapiens PE=2 SV=1	59138	78	0.24	5(2)
Q9H009	NACA2_HUMAN Nascent polypeptide-associated complex subunit alpha-2 OS=Homo sapiens GN=NACA2 PE=1 SV=1	23209	78	0.14	1(1)
Q9UMS4	PRP19_HUMAN Pre-mRNA-processing factor 19 OS=Homo sapiens GN=PRPF19 PE=1 SV=1	55603	78	0.19	5(1)
B3KQ43	B3KQ43_HUMAN cDNA FLJ32791 fis, clone TESTI2002365, highly similar to helicase MOV-10 (EC 3.6.1.-) OS=Homo sapiens PE=2 SV=1	47208	77	0.14	2(2)
B3KT93	B3KT93_HUMAN cDNA FLJ37875 fis, clone BRSSN2018771, highly similar to Poly(A)-binding protein 1 OS=Homo sapiens PE=2 SV=1	70799	77	0.25	8(3)
B4DE91	B4DE91_HUMAN cDNA FLJ55534, highly similar to 4-trimethylaminobutyraldehyde dehydrogenase (EC 1.2.1.47) OS=Homo sapiens PE=2 SV=1	53648	77	0.27	4(3)
B4DZW4	B4DZW4_HUMAN cDNA FLJ57246, highly similar to Poly(A)-binding protein 1 OS=Homo sapiens PE=2 SV=1	65756	77	0.28	7(3)
D3DP78	D3DP78_HUMAN Aspartyl-tRNA synthetase, isoform CRA_b OS=Homo sapiens GN=DARS PE=2 SV=1	53829	77	0.27	5(2)
D7RX09	D7RX09_HUMAN Desmoplakin Ia OS=Homo sapiens PE=2 SV=1	281080	77	0.01	2(1)
G9K388	G9K388_HUMAN YWHAE/FAM22A fusion protein (Fragment) OS=Homo sapiens GN=YWHAE/FAM22A fusion PE=2 SV=1	41540	77	0.26	5(1)
P46977	STT3A_HUMAN Dolichyl-diphosphooligosaccharide--protein glycosyltransferase subunit STT3A OS=Homo sapiens GN=STT3A PE=1 SV=2	81104	77	0.13	3(2)
B2R9U2	B2R9U2_HUMAN cDNA, FLJ94557, highly similar to Homo sapiens FK506 binding protein 4, 59kDa (FKBP4), mRNA OS=Homo sapiens PE=2 SV=1	52087	76	0.2	6(1)
B2RTX2	B2RTX2_HUMAN Palladin, cytoskeletal associated protein OS=Homo sapiens GN=PALLD PE=2 SV=1	123225	76	0.05	2(1)
B4DRU9	B4DRU9_HUMAN cDNA FLJ57179, highly similar to Homo sapiens ATP-binding cassette, sub-family F (GCN20), member 3 (ABCF3), mRNA OS=Homo sapiens PE=2 SV=1	75926	76	0.09	2(2)
B4DVI7	B4DVI7_HUMAN cDNA FLJ54176, highly similar to Signal recognition particle 68 kDa protein OS=Homo sapiens PE=2 SV=1	60646	76	0.24	4(2)
J3QLD9	J3QLD9_HUMAN Flotillin-2 OS=Homo sapiens GN=FLOT2 PE=4 SV=1	47569	76	0.14	2(2)
P11498	PYC_HUMAN Pyruvate carboxylase, mitochondrial OS=Homo sapiens GN=PC PE=1 SV=2	130293	76	0.1	4(1)
P13489	RINI_HUMAN Ribonuclease inhibitor OS=Homo sapiens GN=RNH1 PE=1 SV=2	51766	76	0.2	4(1)
Q1RMY8	Q1RMY8_HUMAN GNB1 protein (Fragment) OS=Homo sapiens GN=GNB1 PE=2 SV=1	37073	76	0.19	2(1)
Q9H3N1	TMX1_HUMAN Thioredoxin-related transmembrane protein 1 OS=Homo sapiens GN=TMX1 PE=1 SV=1	32170	76	0.22	2(2)
A1KYQ7	A1KYQ7_HUMAN Eukaryotic translation initiation factor 3 subunit C OS=Homo sapiens GN=EIF3C PE=2 SV=1	106022	75	0.1	6(1)
B3KT18	B3KT18_HUMAN Glutamate dehydrogenase OS=Homo sapiens PE=2 SV=1	56260	75	0.12	2(2)
F8W6I7	F8W6I7_HUMAN Heterogeneous nuclear ribonucleoprotein A1 OS=Homo sapiens GN=HNRNPA1 PE=2 SV=1	34316	75	0.32	5(1)
H3BVG0	H3BVG0_HUMAN Nuclear pore complex protein Nup93 OS=Homo sapiens GN=NUP93 PE=2 SV=1	100291	75	0.1	3(1)
O14929	HAT1_HUMAN Histone acetyltransferase type B catalytic subunit OS=Homo sapiens GN=HAT1 PE=1 SV=1	49880	75	0.07	1(1)
P20020	AT2B1_HUMAN Plasma membrane calcium-transporting ATPase 1 OS=Homo sapiens GN=ATP2B1 PE=1 SV=3	139637	75	0.07	4(1)
P49419-2	AL7A1_HUMAN Isoform 2 of Alpha-aminoadipic semialdehyde dehydrogenase OS=Homo sapiens GN=ALDH7A1	55845	75	0.33	7(1)
Q13162	PRDX4_HUMAN Peroxiredoxin-4 OS=Homo sapiens GN=PRDX4 PE=1 SV=1	30749	75	0.23	2(2)
Q5T8U3	Q5T8U3_HUMAN 60S ribosomal protein L7a (Fragment) OS=Homo sapiens GN=RPL7A PE=2 SV=1	21702	75	0.54	6(0)
Q96TA1	NIBL1_HUMAN Niban-like protein 1 OS=Homo sapiens GN=FAM129B PE=1 SV=3	84598	75	0.04	1(1)
B3KRR1	B3KRR1_HUMAN cDNA FLJ34725 fis, clone MESAN2005958, highly similar to RNA-binding protein Luc7-like 2 OS=Homo sapiens PE=2 SV=1	40752	74	0.08	1(1)
D3DN77	D3DN77_HUMAN HCG2022736, isoform CRA_a OS=Homo sapiens GN=hCG_2022736 PE=2 SV=1	30806	74	0.51	4(2)
G3V295	G3V295_HUMAN Proteasome subunit alpha type OS=Homo sapiens GN=PSMA6 PE=2 SV=1	23226	74	0.31	2(1)
H3BRR0	H3BRR0_HUMAN Maspardin OS=Homo sapiens GN=SPG21 PE=2 SV=1	17361	74	0.2	1(1)
Q5JY65	Q5JY65_HUMAN Crooked neck-like protein 1 OS=Homo sapiens GN=CRNKL1 PE=2 SV=1	99625	74	0.03	1(1)
B2RBR9	B2RBR9_HUMAN cDNA, FLJ95650, highly similar to Homo sapiens karyopherin (importin) beta 1 (KPNB1), mRNA OS=Homo sapiens PE=2 SV=1	98434	73	0.1	5(1)
F5GY55	F5GY55_HUMAN DNA damage-binding protein 1 OS=Homo sapiens GN=DDB1 PE=2 SV=1	122891	73	0.11	4(2)
H3BRK3	H3BRK3_HUMAN NAD(P)H dehydrogenase [quinone] 1 OS=Homo sapiens GN=NQO1 PE=2 SV=1	30097	73	0.52	5(1)
J3KPX7	J3KPX7_HUMAN Prohibitin-2 OS=Homo sapiens GN=PHB2 PE=4 SV=1	33382	73	0.1	3(1)
M0QXM3	M0QXM3_HUMAN Very-long-chain enoyl-CoA reductase (Fragment) OS=Homo sapiens GN=TECR PE=4 SV=1	15064	73	0.23	1(1)
Q2Q9B7	Q2Q9B7_HUMAN Glucose-6-phosphate 1-dehydrogenase (Fragment) OS=Homo sapiens GN=G6PD PE=3 SV=1	55221	73	0.26	6(2)
Q6FGV9	Q6FGV9_HUMAN PMVK protein (Fragment) OS=Homo sapiens GN=PMVK PE=2 SV=1	22152	73	0.52	3(1)
Q6FHJ5	Q6FHJ5_HUMAN SCAMP3 protein (Fragment) OS=Homo sapiens GN=SCAMP3 PE=2 SV=1	38674	73	0.09	1(1)
Q6IB71	Q6IB71_HUMAN Proteasome subunit alpha type OS=Homo sapiens GN=PSMA3 PE=2 SV=1	28625	73	0.12	3(1)
Q96CS3	FAF2_HUMAN FAS-associated factor 2 OS=Homo sapiens GN=FAF2 PE=1 SV=2	52933	73	0.06	1(1)
Q96KA5	CLP1L_HUMAN Cleft lip and palate transmembrane protein 1-like protein OS=Homo sapiens GN=CLPTM1L PE=1 SV=1	62531	73	0.11	2(1)
B4DJE7	B4DJE7_HUMAN Medium-chain-specific acyl-CoA dehydrogenase, mitochondrial OS=Homo sapiens GN=ACADM PE=2 SV=1	25704	72	0.28	2(1)
B4DX08	B4DX08_HUMAN cDNA FLJ58784, highly similar to T-complex protein 1 subunit epsilon OS=Homo sapiens PE=2 SV=1	57521	72	0.18	6(2)
P14324	FPPS_HUMAN Farnesyl pyrophosphate synthase OS=Homo sapiens GN=FDPS PE=1 SV=4	48758	72	0.22	4(1)
P58107	EPIPL_HUMAN Epiplakin OS=Homo sapiens GN=EPPK1 PE=1 SV=2	557674	72	0.01	2(1)
Q2QD09	Q2QD09_HUMAN Triosephosphate isomerase (Fragment) OS=Homo sapiens PE=3 SV=1	27211	72	0.41	7(0)
B2R8Z8	B2R8Z8_HUMAN cDNA, FLJ94136, highly similar to Homo sapiens synaptotagmin binding, cytoplasmic RNA interacting protein (SYNCRIP), mRNA OS=Homo sapiens PE=2 SV=1	69787	71	0.15	5(1)
B4DT31	B4DT31_HUMAN Far upstream element-binding protein 1 OS=Homo sapiens GN=FUBP1 PE=2 SV=1	69993	71	0.2	8(1)
D6REB4	D6REB4_HUMAN Polyadenylate-binding protein-interacting protein 1 OS=Homo sapiens GN=PAIP1 PE=2 SV=1	40225	71	0.17	3(2)
P13667	PDIA4_HUMAN Protein disulfide-isomerase A4 OS=Homo sapiens GN=PDIA4 PE=1 SV=2	73229	71	0.04	2(1)
Q0D2Q6	Q0D2Q6_HUMAN Phosphoglycerate mutase 1 (Brain) OS=Homo sapiens GN=PGAM1 PE=2 SV=1	28888	71	0.24	2(2)
Q96QK1	VPS35_HUMAN Vacuolar protein sorting-associated protein 35 OS=Homo sapiens GN=VPS35 PE=1 SV=2	92447	71	0.19	6(2)
A2A3R5	A2A3R5_HUMAN 40S ribosomal protein S6 OS=Homo sapiens GN=RPS6 PE=2 SV=1	25067	70	0.13	2(1)
B0QYT4	B0QYT4_HUMAN Ran GTPase-activating protein 1 (Fragment) OS=Homo sapiens GN=RANGAP1 PE=2 SV=1	14307	70	0.24	1(1)
B2R602	B2R602_HUMAN cDNA, FLJ92709, highly similar to Homo sapiens LanC lantibiotic synthetase component C-like 1 (bacterial) (LANCL1), mRNA OS=Homo sapiens PE=2 SV=1	46014	70	0.23	3(1)
O94776	MTA2_HUMAN Metastasis-associated protein MTA2 OS=Homo sapiens GN=MTA2 PE=1 SV=1	75717	70	0.14	3(1)
P55072	TERA_HUMAN Transitional endoplasmic reticulum ATPase OS=Homo sapiens GN=VCP PE=1 SV=4	89950	70	0.15	5(1)
Q68E01	INT3_HUMAN Integrator complex subunit 3 OS=Homo sapiens GN=INTS3 PE=1 SV=1	119533	70	0.03	1(1)
Q6NZ52	Q6NZ52_HUMAN Ribosomal protein L27a OS=Homo sapiens GN=RPL27A PE=2 SV=1	16582	70	0.45	2(1)
A8K2M0	A8K2M0_HUMAN Proteasome (Prosome, macropain) 26S subunit, ATPase, 4, isoform CRA_b OS=Homo sapiens GN=PSMC4 PE=2 SV=1	47451	69	0.31	4(1)
B3KVJ5	B3KVJ5_HUMAN cDNA FLJ16648 fis, clone TESTI4035508, highly similar to Structural maintenance of chromosomes 4-like 1 protein OS=Homo sapiens PE=2 SV=1	101354	69	0.07	2(1)
Q53F35	Q53F35_HUMAN Acidic (Leucine-rich) nuclear phosphoprotein 32 family, member B variant (Fragment) OS=Homo sapiens PE=2 SV=1	28826	69	0.55	5(1)
Q53XC0	Q53XC0_HUMAN Eukaryotic translation initiation factor 2, subunit 1 alpha, 35kDa, isoform CRA_a OS=Homo sapiens GN=EIF2S1 PE=2 SV=1	36374	69	0.09	1(1)
B4DDF7	B4DDF7_HUMAN cDNA FLJ53296, highly similar to Serine/threonine-protein phosphatase 2A 65 kDa regulatory subunit A alpha isoform OS=Homo sapiens PE=2 SV=1	64939	68	0.1	2(2)
B4DPW9	B4DPW9_HUMAN cDNA FLJ51929, highly similar to Plastin-3 OS=Homo sapiens PE=2 SV=1	68070	68	0.1	6(1)
H0Y8E6	H0Y8E6_HUMAN DNA replication licensing factor MCM2 (Fragment) OS=Homo sapiens GN=MCM2 PE=3 SV=1	94792	68	0.11	4(1)
J3JS69	J3JS69_HUMAN 40S ribosomal protein S18 OS=Homo sapiens GN=RPS18 PE=3 SV=1	9761	68	0.84	2(1)
O75643	U520_HUMAN U5 small nuclear ribonucleoprotein 200 kDa helicase OS=Homo sapiens GN=SNRNP200 PE=1 SV=2	246006	68	0.04	3(0)
Q0QF37	Q0QF37_HUMAN Malate dehydrogenase (Fragment) OS=Homo sapiens GN=MDH2 PE=2 SV=1	32405	68	0.22	2(2)
Q6ICQ8	Q6ICQ8_HUMAN ARHG protein (Fragment) OS=Homo sapiens GN=ARHG PE=2 SV=1	21751	68	0.33	3(1)
B2RBA6	B2RBA6_HUMAN cDNA, FLJ95407, highly similar to Homo sapiens MCM7 minichromosome maintenance deficient 7 (S. cerevisiae) (MCM7), mRNA OS=Homo sapiens PE=2 SV=1	81856	67	0.13	3(1)
B2RNR6	B2RNR6_HUMAN Zinc finger RNA binding protein OS=Homo sapiens GN=ZFR PE=2 SV=1	118081	67	0.09	4(1)
B3KX72	B3KX72_HUMAN cDNA FLJ44920 fis, clone BRAMY3011501, highly similar to Heterogeneous nuclear ribonucleoprotein U OS=Homo sapiens PE=2 SV=1	83774	67	0.17	6(1)
B4DJ45	B4DJ45_HUMAN TAR DNA-binding protein 43 OS=Homo sapiens GN=TARDBP PE=2 SV=1	32073	67	0.1	1(1)
B4DY16	B4DY16_HUMAN cDNA FLJ51385, highly similar to Ran GTPase-activating protein 1 OS=Homo sapiens PE=2 SV=1	58178	67	0.12	3(1)
H0YDT6	H0YDT6_HUMAN Eukaryotic translation initiation factor 3 subunit F (Fragment) OS=Homo sapiens GN=EIF3F PE=2 SV=1	10801	67	0.32	1(1)
O14980	XPO1_HUMAN Exportin-1 OS=Homo sapiens GN=XPO1 PE=1 SV=1	124447	67	0.08	7(1)
P54136-2	SYRC_HUMAN Isoform Monomeric of Arginine--tRNA ligase, cytoplasmic OS=Homo sapiens GN=RARS	67725	67	0.21	5(0)
Q0QER2	Q0QER2_HUMAN Isocitrate dehydrogenase [NADP] (Fragment) OS=Homo sapiens GN=IDH1 PE=2 SV=1	42091	67	0.16	2(1)
A2A274	A2A274_HUMAN Aconitate hydratase, mitochondrial OS=Homo sapiens GN=ACO2 PE=2 SV=1	88563	66	0.04	1(1)
B2R4P2	B2R4P2_HUMAN cDNA, FLJ92164, highly similar to Homo sapiens peroxiredoxin 1 (PRDX1), mRNA OS=Homo sapiens PE=2 SV=1	22414	66	0.32	2(2)
B4DSN3	B4DSN3_HUMAN cDNA FLJ60345, highly similar to Protein transport protein Sec24C OS=Homo sapiens PE=2 SV=1	107974	66	0.03	1(1)
B4DY09	B4DY09_HUMAN cDNA FLJ51660, highly similar to Interleukin enhancer-binding factor 2 OS=Homo sapiens PE=2 SV=1	39057	66	0.28	7(1)
Q0IJ56	Q0IJ56_HUMAN ST13 protein (Fragment) OS=Homo sapiens GN=ST13 PE=2 SV=1	35164	66	0.2	5(1)
B2RCV1	B2RCV1_HUMAN cDNA, FLJ96310, highly similar to Homo sapiens solute carrier family 25 (mitochondrial carrier; adenine nucleotide translocator), member 5 (SLC25A5), mRNA OS=Homo sapiens PE=2 SV=1	33062	65	0.33	3(2)
B3KUD7	B3KUD7_HUMAN cDNA FLJ39640 fis, clone SMINT2003386, highly similar to DNA REPLICATION LICENSING FACTOR MCM7 OS=Homo sapiens PE=2 SV=1	69115	65	0.15	5(1)
E9PH29	E9PH29_HUMAN Thioredoxin-dependent peroxide reductase, mitochondrial OS=Homo sapiens GN=PRDX3 PE=2 SV=1	26107	65	0.27	5(1)
H0YER7	H0YER7_HUMAN Apoptosis inhibitor 5 (Fragment) OS=Homo sapiens GN=API5 PE=2 SV=1	33482	65	0.21	3(2)
J3KS65	J3KS65_HUMAN Importin subunit alpha-2 (Fragment) OS=Homo sapiens GN=KPNA2 PE=4 SV=1	16311	65	0.21	2(1)
O15397	IPO8_HUMAN Importin-8 OS=Homo sapiens GN=IPO8 PE=1 SV=2	120945	65	0.08	4(1)
P13010	XRCC5_HUMAN X-ray repair cross-complementing protein 5 OS=Homo sapiens GN=XRCC5 PE=1 SV=3	83222	65	0.21	7(1)
Q6IBS9	Q6IBS9_HUMAN HADH2 protein OS=Homo sapiens GN=HADH2 PE=2 SV=1	27134	65	0.59	4(1)
Q9UJS0	CMC2_HUMAN Calcium-binding mitochondrial carrier protein Aralar2 OS=Homo sapiens GN=SLC25A13 PE=1 SV=2	74528	65	0.14	4(0)
B2R491	B2R491_HUMAN Ribosomal protein S4, X-linked, isoform CRA_c OS=Homo sapiens GN=RPS4X PE=2 SV=1	29807	64	0.24	3(2)
B2R5V2	B2R5V2_HUMAN Succinyl-CoA:3-ketoacid-coenzyme A transferase OS=Homo sapiens PE=2 SV=1	56520	64	0.12	3(1)
B2RE88	B2RE88_HUMAN cDNA, FLJ96465, highly similar to Homo sapiens solute carrier family 25 (mitochondrial carrier;phosphate carrier), member 3 (SLC25A3), nuclear gene encodingmitochondrial protein, transcript variant 1b, mRNA OS=Homo sapiens PE=2 SV=1	40379	64	0.08	2(1)
B3KTN4	B3KTN4_HUMAN Citrate synthase OS=Homo sapiens PE=2 SV=1	47218	64	0.14	2(1)
B4DZI8	B4DZI8_HUMAN Coatomer protein complex, subunit beta 2 (Beta prime), isoform CRA_b OS=Homo sapiens GN=COPB2 PE=2 SV=1	99839	64	0.1	3(1)
B7Z2F4	B7Z2F4_HUMAN T-complex protein 1 subunit delta OS=Homo sapiens GN=CCT4 PE=2 SV=1	42729	64	0.16	2(2)
D3DS95	D3DS95_HUMAN HCG21173, isoform CRA_a OS=Homo sapiens GN=hCG_21173 PE=4 SV=1	10174	64	0.34	2(2)
F8VS81	F8VS81_HUMAN Twinfilin-1 (Fragment) OS=Homo sapiens GN=TWF1 PE=2 SV=1	33615	64	0.1	1(1)
H0YAS9	H0YAS9_HUMAN ER membrane protein complex subunit 2 (Fragment) OS=Homo sapiens GN=EMC2 PE=4 SV=1	16089	64	0.21	1(1)
H0YBL1	H0YBL1_HUMAN Inositol monophosphatase 1 (Fragment) OS=Homo sapiens GN=IMPA1 PE=4 SV=1	29020	64	0.11	1(1)
J3KN69	J3KN69_HUMAN Arylacetamide deacetylase-like 1 OS=Homo sapiens GN=NCEH1 PE=4 SV=1	49431	64	0.07	1(1)
K7EIG1	K7EIG1_HUMAN Clustered mitochondria protein homolog OS=Homo sapiens GN=CLUH PE=3 SV=1	140903	64	0.1	6(0)
P31937	3HIDH_HUMAN 3-hydroxyisobutyrate dehydrogenase, mitochondrial OS=Homo sapiens GN=HIBADH PE=1 SV=2	35705	64	0.19	2(1)
Q14683	SMC1A_HUMAN Structural maintenance of chromosomes protein 1A OS=Homo sapiens GN=SMC1A PE=1 SV=2	143771	64	0.02	2(1)
A4D111	A4D111_HUMAN Similar to Chain , Heat-Shock Cognate 70kd Protein (44kd Atpase N-Terminal) (E.C.3.6.1.3) Mutant With Asp 206 Replaced By Ser (D206s) OS=Homo sapiens GN=LOC401308 PE=3 SV=1	25582	63	0.28	2(1)
B4DP46	B4DP46_HUMAN cDNA FLJ59367, highly similar to Adenylosuccinate lyase (EC 4.3.2.2) OS=Homo sapiens PE=2 SV=1	56993	63	0.06	4(1)
K7EKG4	K7EKG4_HUMAN Mitochondrial import receptor subunit TOM40 homolog (Fragment) OS=Homo sapiens GN=TOMM40 PE=4 SV=1	18328	63	0.18	1(1)
P01008	ANT3_HUMAN Antithrombin-III OS=Homo sapiens GN=SERPINC1 PE=1 SV=1	53025	63	0.06	3(2)
P28070	PSB4_HUMAN Proteasome subunit beta type-4 OS=Homo sapiens GN=PSMB4 PE=1 SV=4	29242	63	0.24	2(2)
Q15645	PCH2_HUMAN Pachytene checkpoint protein 2 homolog OS=Homo sapiens GN=TRIP13 PE=1 SV=2	48863	63	0.14	5(1)
B1AK87	B1AK87_HUMAN Capping protein (Actin filament) muscle Z-line, beta, isoform CRA_a OS=Homo sapiens GN=CAPZB PE=2 SV=1	29562	62	0.38	4(1)
B2R825	B2R825_HUMAN Phosphorylase OS=Homo sapiens PE=2 SV=1	97405	62	0.07	2(1)
B3KNM0	B3KNM0_HUMAN cDNA FLJ14916 fis, clone PLACE1006958, highly similar to Heat shock 70 kDa protein 4L (Fragment) OS=Homo sapiens PE=2 SV=1	64588	62	0.1	2(1)
B4DFR3	B4DFR3_HUMAN cDNA FLJ55771, highly similar to Lamin-A/C OS=Homo sapiens PE=2 SV=1	25697	62	0.13	1(1)
B9A041	B9A041_HUMAN Malate dehydrogenase, cytoplasmic OS=Homo sapiens GN=MDH1 PE=2 SV=1	23195	62	0.31	2(1)
E5RGV0	E5RGV0_HUMAN Heterogeneous nuclear ribonucleoprotein H (Fragment) OS=Homo sapiens GN=HNRNPH1 PE=2 SV=1	17610	62	0.19	2(1)
F5GWG3	F5GWG3_HUMAN Retinoic acid-induced protein 3 (Fragment) OS=Homo sapiens GN=GPRC5A PE=2 SV=1	30940	62	0.11	1(1)
F8WE04	F8WE04_HUMAN Heat shock protein beta-1 OS=Homo sapiens GN=HSPB1 PE=2 SV=1	20565	62	0.35	2(2)
G3V1A1	G3V1A1_HUMAN 60S ribosomal protein L8 OS=Homo sapiens GN=RPL8 PE=2 SV=1	18329	62	0.18	1(1)
H0Y9Q7	H0Y9Q7_HUMAN Calnexin (Fragment) OS=Homo sapiens GN=CANX PE=3 SV=1	18990	62	1.26	5(0)
Q04828	AK1C1_HUMAN Aldo-keto reductase family 1 member C1 OS=Homo sapiens GN=AKR1C1 PE=1 SV=1	37221	62	0.29	3(2)
Q6IBB0	Q6IBB0_HUMAN IFITM2 protein OS=Homo sapiens GN=IFITM2 PE=2 SV=1	14722	62	0.23	1(1)
A6QKW0	A6QKW0_HUMAN SHINC3 OS=Homo sapiens GN=SHINC3 PE=2 SV=1	28275	61	0.12	1(1)
B3KVR1	B3KVR1_HUMAN Small nuclear ribonucleoprotein-associated protein OS=Homo sapiens GN=SNRPN PE=2 SV=1	25230	61	0.28	4(3)
E5RFS9	E5RFS9_HUMAN Methionine adenosyltransferase 2 subunit beta OS=Homo sapiens GN=MAT2B PE=2 SV=1	9467	61	0.37	1(1)
H0Y7L9	H0Y7L9_HUMAN ATP-binding cassette sub-family D member 1 (Fragment) OS=Homo sapiens GN=ABCD1 PE=4 SV=1	24597	61	0.14	1(1)
H0YFD6	H0YFD6_HUMAN Trifunctional enzyme subunit alpha, mitochondrial (Fragment) OS=Homo sapiens GN=HADHA PE=2 SV=1	27376	61	0.12	2(1)
P37802	TAGL2_HUMAN Transgelin-2 OS=Homo sapiens GN=TAGLN2 PE=1 SV=3	22548	61	0.15	1(1)
Q3KQZ8	Q3KQZ8_HUMAN EPRS protein (Fragment) OS=Homo sapiens GN=EPRS PE=2 SV=1	110782	61	0.06	3(1)
A2RUM7	A2RUM7_HUMAN Ribosomal protein L5 OS=Homo sapiens GN=RPL5 PE=2 SV=1	34569	60	0.2	2(1)
B0S8A9	B0S8A9_HUMAN Flotillin-1 (Fragment) OS=Homo sapiens GN=FLOT1 PE=2 SV=1	20479	60	0.36	3(1)
B2R4D8	B2R4D8_HUMAN 60S ribosomal protein L27 OS=Homo sapiens PE=2 SV=1	15760	60	0.48	2(1)
B4E0R6	B4E0R6_HUMAN Importin-5 OS=Homo sapiens GN=IPO5 PE=2 SV=1	110656	60	0.09	3(1)
E7ERK9	E7ERK9_HUMAN Translation initiation factor eIF-2B subunit delta OS=Homo sapiens GN=EIF2B4 PE=2 SV=1	60248	60	0.05	1(1)
H3BRG4	H3BRG4_HUMAN Cytochrome b-c1 complex subunit 2, mitochondrial OS=Homo sapiens GN=UQCRC2 PE=2 SV=1	44778	60	0.07	1(1)
J3KPP4	J3KPP4_HUMAN Cisplatin resistance-associated overexpressed protein, isoform CRA_b OS=Homo sapiens GN=LUC7L3 PE=4 SV=1	58698	60	0.06	1(1)
Q12996	CSTF3_HUMAN Cleavage stimulation factor subunit 3 OS=Homo sapiens GN=CSTF3 PE=1 SV=1	83325	60	0.08	2(2)
Q53RS3	Q53RS3_HUMAN Putative uncharacterized protein DDEF2 (Fragment) OS=Homo sapiens GN=DDEF2 PE=2 SV=1	70046	60	0.1	5(3)
Q6IAT9	Q6IAT9_HUMAN Proteasome subunit beta type OS=Homo sapiens GN=PSMB6 PE=2 SV=1	25570	60	0.28	2(1)
Q9UHX1	PUF60_HUMAN Poly(U)-binding-splicing factor PUF60 OS=Homo sapiens GN=PUF60 PE=1 SV=1	60009	60	0.24	5(1)
A6NHU4	A6NHU4_HUMAN Aldo-keto reductase family 1 member C1 OS=Homo sapiens GN=AKR1C1 PE=2 SV=1	23498	59	0.49	3(1)
B1ANK7	B1ANK7_HUMAN Fumarate hydratase, isoform CRA_c OS=Homo sapiens GN=FH PE=2 SV=1	54773	59	0.19	4(1)
B2R5W3	B2R5W3_HUMAN cDNA, FLJ92658, highly similar to Homo sapiens poly (ADP-ribose) polymerase family, member 1 (PARP1), mRNA OS=Homo sapiens PE=2 SV=1	113813	59	0.06	2(1)
B4DH65	B4DH65_HUMAN cDNA FLJ53323, highly similar to 2-oxoglutarate dehydrogenase E1 component, mitochondrial (EC 1.2.4.2) OS=Homo sapiens PE=2 SV=1	98659	59	0.1	4(2)
D3DNL3	D3DNL3_HUMAN G elongation factor, mitochondrial 1, isoform CRA_c OS=Homo sapiens GN=GFM1 PE=4 SV=1	46282	59	0.15	2(1)
H0Y7C0	H0Y7C0_HUMAN General vesicular transport factor p115 (Fragment) OS=Homo sapiens GN=USO1 PE=4 SV=1	72345	59	0.05	1(1)
H3BRD9	H3BRD9_HUMAN Nuclear pore complex protein Nup93 (Fragment) OS=Homo sapiens GN=NUP93 PE=4 SV=1	15974	59	0.21	2(1)
H3BUX2	H3BUX2_HUMAN Cytochrome b5 type B OS=Homo sapiens GN=CYB5B PE=2 SV=1	15878	59	0.21	1(1)
J3KQU9	J3KQU9_HUMAN AP-1 complex subunit gamma-1 OS=Homo sapiens GN=AP1G1 PE=4 SV=1	92493	59	0.04	1(1)
M0QZN2	M0QZN2_HUMAN 40S ribosomal protein S5 OS=Homo sapiens GN=RPS5 PE=4 SV=1	14868	59	0.23	1(1)
B2RAQ8	B2RAQ8_HUMAN cDNA, FLJ95058, highly similar to Homo sapiens carnitine palmitoyltransferase 1A (liver) (CPT1A),nuclear gene encoding mitochondrial protein, mRNA OS=Homo sapiens PE=2 SV=1	88967	58	0.07	3(1)
B3KQK0	B3KQK0_HUMAN cDNA FLJ90599 fis, clone PLACE1001340, highly similar to Mitochondrial proteins importreceptor OS=Homo sapiens PE=2 SV=1	26804	58	0.26	2(2)
B4DL87	B4DL87_HUMAN cDNA FLJ52243, highly similar to Heat-shock protein beta-1 OS=Homo sapiens PE=2 SV=1	18582	58	0.18	1(1)
G3V3E6	G3V3E6_HUMAN ERO1-like protein alpha OS=Homo sapiens GN=ERO1L PE=2 SV=1	30351	58	0.11	1(1)
M0QYS1	M0QYS1_HUMAN 60S ribosomal protein L13a (Fragment) OS=Homo sapiens GN=RPL13A PE=4 SV=1	23919	58	0.14	1(1)
M0QZW4	M0QZW4_HUMAN Delta(3,5)-Delta(2,4)-dienoyl-CoA isomerase, mitochondrial (Fragment) OS=Homo sapiens GN=ECH1 PE=4 SV=1	20004	58	0.17	1(1)
P22626	ROA2_HUMAN Heterogeneous nuclear ribonucleoproteins A2/B1 OS=Homo sapiens GN=HNRNPA2B1 PE=1 SV=2	37464	58	0.4	6(2)
Q5XJ04	Q5XJ04_HUMAN 3-hydroxy-3-methylglutaryl-Coenzyme A synthase 1 (Soluble) OS=Homo sapiens GN=HMGCS1 PE=2 SV=1	57854	58	0.12	3(1)
Q6PIK3	Q6PIK3_HUMAN HCG1995540, isoform CRA_b OS=Homo sapiens GN=RAB4B PE=2 SV=1	13642	58	0.56	3(1)
A0FGR8	ESYT2_HUMAN Extended synaptotagmin-2 OS=Homo sapiens GN=ESYT2 PE=1 SV=1	102807	57	0.03	1(1)
B2R923	B2R923_HUMAN cDNA, FLJ94174 OS=Homo sapiens PE=2 SV=1	37453	57	0.09	3(1)
B3KX19	B3KX19_HUMAN cDNA FLJ44500 fis, clone UTERU3000828, highly similar to 116 kDa U5 small nuclear ribonucleoprotein component OS=Homo sapiens PE=2 SV=1	109111	57	0.09	6(0)
B3KY95	B3KY95_HUMAN cDNA FLJ16143 fis, clone BRAMY2038516, highly similar to Protein disulfide-isomerase A6 (EC 5.3.4.1) OS=Homo sapiens PE=2 SV=1	53655	57	0.13	3(1)
H0Y3Y4	H0Y3Y4_HUMAN Septin-7 (Fragment) OS=Homo sapiens GN=SEPT7 PE=2 SV=1	43294	57	0.25	3(1)
P46060	RAGP1_HUMAN Ran GTPase-activating protein 1 OS=Homo sapiens GN=RANGAP1 PE=1 SV=1	63958	57	0.11	2(0)
Q58FF4	Q58FF4_HUMAN Heat shock protein 90Bf OS=Homo sapiens GN=HSP90Bf PE=1 SV=1	41833	57	0.08	5(2)
A4D210	A4D210_HUMAN Eukaryotic translation initiation factor 3 subunit B OS=Homo sapiens GN=EIF3B PE=3 SV=1	89024	56	0.07	2(1)
A6NLN1	A6NLN1_HUMAN Polypyrimidine tract binding protein 1, isoform CRA_e OS=Homo sapiens GN=PTBP1 PE=2 SV=3	21899	56	0.33	2(1)
B2RU06	B2RU06_HUMAN EIF4G1 protein OS=Homo sapiens GN=EIF4G1 PE=2 SV=1	176807	56	0.06	4(1)
B4DF70	B4DF70_HUMAN cDNA FLJ60461, highly similar to Peroxiredoxin-2 (EC 1.11.1.15) OS=Homo sapiens PE=2 SV=1	20209	56	0.36	3(1)
B4DLU5	B4DLU5_HUMAN cDNA FLJ60675, highly similar to ATP-dependent RNA helicase DDX3X (EC 3.6.1.-) OS=Homo sapiens PE=2 SV=1	59080	56	0.11	3(1)
H3BMZ1	H3BMZ1_HUMAN Very-long-chain (3R)-3-hydroxyacyl-[acyl-carrier protein] dehydratase 3 (Fragment) OS=Homo sapiens GN=PTPLAD1 PE=2 SV=1	16267	56	0.21	1(1)
H7C0V6	H7C0V6_HUMAN Eukaryotic translation initiation factor 4 gamma 1 (Fragment) OS=Homo sapiens GN=EIF4G1 PE=4 SV=1	20313	56	0.17	2(1)
J3KRX5	J3KRX5_HUMAN 60S ribosomal protein L17 (Fragment) OS=Homo sapiens GN=RPL17 PE=3 SV=1	20386	56	0.58	3(1)
O00231	PSD11_HUMAN 26S proteasome non-ATPase regulatory subunit 11 OS=Homo sapiens GN=PSMD11 PE=1 SV=3	47719	56	0.07	3(1)
P62851	RS25_HUMAN 40S ribosomal protein S25 OS=Homo sapiens GN=RPS25 PE=1 SV=1	13791	56	0.56	3(2)
Q96F88	Q96F88_HUMAN Processing of 1, ribonuclease P/MRP subunit (S. cerevisiae) OS=Homo sapiens GN=POP1 PE=2 SV=1	116318	56	0.03	1(1)
B5LY67	B5LY67_HUMAN Uridine monophosphate synthetase isoform E OS=Homo sapiens GN=UMPS PE=2 SV=1	38086	55	0.09	2(1)
D6RBW1	D6RBW1_HUMAN Eukaryotic translation initiation factor 4E OS=Homo sapiens GN=EIF4E PE=2 SV=1	28722	55	0.12	1(1)
H0YK48	H0YK48_HUMAN Tropomyosin alpha-1 chain OS=Homo sapiens GN=TPM1 PE=2 SV=1	28620	55	0.12	2(1)
J3QL37	J3QL37_HUMAN Splicing factor 3B subunit 3 (Fragment) OS=Homo sapiens GN=SF3B3 PE=4 SV=1	6530	55	1.39	2(1)
M0R117	M0R117_HUMAN 60S ribosomal protein L18a OS=Homo sapiens GN=RPL18A PE=3 SV=1	18352	55	0.4	3(1)
O00425	IF2B3_HUMAN Insulin-like growth factor 2 mRNA-binding protein 3 OS=Homo sapiens GN=IGF2BP3 PE=1 SV=2	64008	55	0.11	3(1)
P04792	HSPB1_HUMAN Heat shock protein beta-1 OS=Homo sapiens GN=HSPB1 PE=1 SV=2	22826	55	0.51	3(0)
P35998	PRS7_HUMAN 26S protease regulatory subunit 7 OS=Homo sapiens GN=PSMC2 PE=1 SV=3	49002	55	0.3	4(0)
Q27J81	INF2_HUMAN Inverted formin-2 OS=Homo sapiens GN=INF2 PE=1 SV=2	136851	55	0.02	2(1)
Q5SRT3	Q5SRT3_HUMAN Chloride intracellular channel 1, isoform CRA_a OS=Homo sapiens GN=CLIC1 PE=2 SV=2	27248	55	0.12	1(1)
Q9BR63	Q9BR63_HUMAN FARSB protein (Fragment) OS=Homo sapiens GN=FARSB PE=2 SV=2	66287	55	0.05	1(1)
B2RBV7	B2RBV7_HUMAN cDNA, FLJ95721, highly similar to Homo sapiens cullin 4A (CUL4A), mRNA OS=Homo sapiens PE=2 SV=1	77212	54	0.04	2(1)
B4DJ30	B4DJ30_HUMAN cDNA FLJ61290, highly similar to Neutral alpha-glucosidase AB OS=Homo sapiens PE=2 SV=1	113539	54	0.06	4(2)
B4DXZ6	B4DXZ6_HUMAN Fragile X mental retardation syndrome-related protein 1 OS=Homo sapiens GN=FXR1 PE=2 SV=1	68627	54	0.05	1(1)
B5BUD2	B5BUD2_HUMAN Replication factor C 2 isoform 1 (Fragment) OS=Homo sapiens GN=RFC2 PE=2 SV=1	39616	54	0.08	1(1)
B7ZKK7	B7ZKK7_HUMAN EIF2AK2 protein OS=Homo sapiens GN=EIF2AK2 PE=2 SV=1	61928	54	0.05	1(1)
D6REX3	D6REX3_HUMAN Protein transport protein Sec31A OS=Homo sapiens GN=SEC31A PE=2 SV=1	137110	54	0.05	3(0)
H7C1U0	H7C1U0_HUMAN Acylamino-acid-releasing enzyme (Fragment) OS=Homo sapiens GN=APEH PE=2 SV=1	35132	54	0.09	2(1)
P14923	PLAK_HUMAN Junction plakoglobin OS=Homo sapiens GN=JUP PE=1 SV=3	82434	54	0.12	5(1)
Q0VGA5	Q0VGA5_HUMAN SARS protein OS=Homo sapiens GN=SARS PE=2 SV=1	58883	54	0.11	2(1)
R4GMR5	R4GMR5_HUMAN 26S proteasome non-ATPase regulatory subunit 8 OS=Homo sapiens GN=PSMD8 PE=4 SV=1	32702	54	0.34	4(1)
A8K517	A8K517_HUMAN Ribosomal protein S23, isoform CRA_a OS=Homo sapiens GN=RPS23 PE=2 SV=1	15969	53	0.21	2(1)
A8KAK1	A8KAK1_HUMAN cDNA FLJ77398, highly similar to Homo sapiens UDP-glucose ceramide glucosyltransferase-like 1, transcript variant 2, mRNA OS=Homo sapiens PE=2 SV=1	175467	53	0.04	3(1)
B2R984	B2R984_HUMAN cDNA, FLJ94268, highly similar to Homo sapiens histone 1, H1e (HIST1H1E), mRNA OS=Homo sapiens PE=2 SV=1	21880	53	0.33	2(1)
B2RDD7	B2RDD7_HUMAN cDNA, FLJ96564, highly similar to Homo sapiens SKB1 homolog (S. pombe) (SKB1), mRNA OS=Homo sapiens PE=2 SV=1	73348	53	0.09	2(1)
B3KWY2	B3KWY2_HUMAN cDNA FLJ44205 fis, clone THYMU3001379, highly similar to 116 kDa U5 small nuclear ribonucleoprotein component OS=Homo sapiens PE=2 SV=1	61697	53	0.11	2(1)
B4DY96	B4DY96_HUMAN cDNA FLJ55769, highly similar to Trifunctional enzyme subunit beta, mitochondrial OS=Homo sapiens PE=2 SV=1	50989	53	0.13	3(1)
P00390	GSHR_HUMAN Glutathione reductase, mitochondrial OS=Homo sapiens GN=GSR PE=1 SV=2	56791	53	0.12	2(1)
A8KA19	A8KA19_HUMAN cDNA FLJ75831, highly similar to Homo sapiens exportin, tRNA (nuclear export receptor for tRNAs) (XPOT), mRNA OS=Homo sapiens PE=2 SV=1	111104	52	0.06	2(0)
B1AHC8	B1AHC8_HUMAN X-ray repair complementing defective repair in Chinese hamster cells 6 (Ku autoantigen, 70kDa), isoform CRA_b OS=Homo sapiens GN=XRCC6 PE=2 SV=1	65336	52	0.1	2(1)
B2R4P9	B2R4P9_HUMAN Histone H3 OS=Homo sapiens GN=H3F3B PE=2 SV=1	15376	52	0.23	1(1)
B2R657	B2R657_HUMAN Annexin OS=Homo sapiens PE=2 SV=1	52892	52	0.13	3(1)
B2R679	B2R679_HUMAN cDNA, FLJ92825, highly similar to Homo sapiens SAR1a gene homolog 1 (S. cerevisiae) (SARA1), mRNA OS=Homo sapiens PE=2 SV=1	22395	52	0.15	1(1)
B4DP62	B4DP62_HUMAN Solute carrier family 25 (Mitochondrial carrier; citrate transporter), member 1, isoform CRA_b OS=Homo sapiens GN=SLC25A1 PE=2 SV=1	23423	52	0.14	2(1)
B4DY32	B4DY32_HUMAN Asparagine synthetase OS=Homo sapiens PE=2 SV=1	55055	52	0.12	3(1)
B7Z601	B7Z601_HUMAN cDNA FLJ57187, highly similar to Glycerol-3-phosphate dehydrogenase, mitochondrial (EC 1.1.99.5) OS=Homo sapiens PE=2 SV=1	56047	52	0.06	1(1)
H0Y2X5	H0Y2X5_HUMAN Aldehyde dehydrogenase 1 family, member A3, isoform CRA_b OS=Homo sapiens GN=ALDH1A3 PE=2 SV=1	44742	52	0.15	2(1)
H0YF10	H0YF10_HUMAN Histone-binding protein RBBP4 (Fragment) OS=Homo sapiens GN=RBBP4 PE=4 SV=1	23461	52	0.14	1(1)
I3L492	I3L492_HUMAN Eukaryotic peptide chain release factor subunit 1 (Fragment) OS=Homo sapiens GN=ETF1 PE=2 SV=1	23028	52	0.15	1(1)
K7ENR6	K7ENR6_HUMAN Proteasome assembly chaperone 2 OS=Homo sapiens GN=PSMG2 PE=4 SV=1	27078	52	0.12	1(1)
P16152	CBR1_HUMAN Carbonyl reductase [NADPH] 1 OS=Homo sapiens GN=CBR1 PE=1 SV=3	30641	52	0.23	2(1)
Q6IBS5	Q6IBS5_HUMAN DLST protein OS=Homo sapiens GN=DLST PE=2 SV=1	49131	52	0.14	5(2)
Q9H3P7	GCP60_HUMAN Golgi resident protein GCP60 OS=Homo sapiens GN=ACBD3 PE=1 SV=4	60841	52	0.05	1(1)
A8K7T0	A8K7T0_HUMAN Kynureninase OS=Homo sapiens GN=KYNU PE=2 SV=1	52848	51	0.2	3(0)
B4DQG8	B4DQG8_HUMAN cDNA FLJ54124, highly similar to DNA methyltransferase 1-associated protein 1 OS=Homo sapiens PE=2 SV=1	52000	51	0.06	1(1)
H0YA05	H0YA05_HUMAN Palladin (Fragment) OS=Homo sapiens GN=PALLD PE=4 SV=1	17863	51	0.19	1(1)
H0YGL6	H0YGL6_HUMAN Ras-related protein Rab-6A (Fragment) OS=Homo sapiens GN=RAB6A PE=3 SV=1	22860	51	0.15	1(1)
I6TRR8	I6TRR8_HUMAN SND1-BRAF fusion OS=Homo sapiens PE=2 SV=1	109820	51	0.09	5(0)
P62906	RL10A_HUMAN 60S ribosomal protein L10a OS=Homo sapiens GN=RPL10A PE=1 SV=2	24987	51	0.13	1(1)
Q15056	IF4H_HUMAN Eukaryotic translation initiation factor 4H OS=Homo sapiens GN=EIF4H PE=1 SV=5	27425	51	0.26	3(1)
Q5JQF8	PAP1M_HUMAN Polyadenylate-binding protein 1-like 2 OS=Homo sapiens GN=PABPC1L2A PE=2 SV=1	22956	51	0.15	2(1)
Q5T081	Q5T081_HUMAN CHC1 protein OS=Homo sapiens GN=RCC1 PE=2 SV=1	45397	51	0.23	3(1)
Q5T621	Q5T621_HUMAN Alcohol dehydrogenase [NADP(+)] (Fragment) OS=Homo sapiens GN=AKR1A1 PE=2 SV=1	16677	51	0.2	1(1)
Q5U602	Q5U602_HUMAN RAB33B, member RAS oncogene family OS=Homo sapiens GN=RAB33B PE=2 SV=1	26024	51	0.13	1(1)
Q9BS40	LXN_HUMAN Latexin OS=Homo sapiens GN=LXN PE=1 SV=2	25848	51	0.27	3(1)
A1A5C4	A1A5C4_HUMAN RRBP1 protein OS=Homo sapiens GN=RRBP1 PE=2 SV=1	103162	50	0.06	2(0)
A2A2L5	A2A2L5_HUMAN Protein RTF2 homolog (Fragment) OS=Homo sapiens GN=RTFDC1 PE=2 SV=1	31759	50	0.1	1(1)
B0UX83	B0UX83_HUMAN HLA-B associated transcript 3, isoform CRA_a OS=Homo sapiens GN=BAG6 PE=2 SV=1	119085	50	0.03	1(1)
B2R659	B2R659_HUMAN cDNA, FLJ92803, highly similar to Homo sapiens hydroxysteroid (17-beta) dehydrogenase 4 (HSD17B4), mRNA OS=Homo sapiens PE=2 SV=1	80018	50	0.04	1(1)
B2RD36	B2RD36_HUMAN cDNA, FLJ96437 OS=Homo sapiens PE=2 SV=1	28382	50	0.25	2(1)
B4DH52	B4DH52_HUMAN cDNA FLJ55916, highly similar to General transcription factor II-I OS=Homo sapiens PE=2 SV=1	112359	50	0.06	4(1)
B4DSA8	B4DSA8_HUMAN cDNA FLJ51067, highly similar to DNA damage-binding protein 1 OS=Homo sapiens PE=2 SV=1	112974	50	0.09	3(0)
B4DVD2	B4DVD2_HUMAN cDNA FLJ60170, highly similar to Guanine nucleotide-binding protein subunit beta 2-like 1 OS=Homo sapiens PE=2 SV=1	24703	50	0.29	2(0)
B4DY47	B4DY47_HUMAN Prohibitin OS=Homo sapiens GN=PHB PE=2 SV=1	17064	50	0.43	2(1)
B7Z2I3	B7Z2I3_HUMAN cDNA FLJ55514, highly similar to Epidermal growth factor receptor (EC 2.7.10.1) OS=Homo sapiens PE=2 SV=1	131877	50	0.02	1(1)
F8VS17	F8VS17_HUMAN Coatomer subunit zeta-1 OS=Homo sapiens GN=COPZ1 PE=2 SV=1	18420	50	0.18	1(1)
H0Y9B6	H0Y9B6_HUMAN Beta-hexosaminidase subunit beta (Fragment) OS=Homo sapiens GN=HEXB PE=4 SV=1	23464	50	0.31	2(1)
H0YCS0	H0YCS0_HUMAN Beta-2-syntrophin (Fragment) OS=Homo sapiens GN=SNTB2 PE=4 SV=1	18052	50	0.19	2(1)
H3BM89	H3BM89_HUMAN 60S ribosomal protein L4 OS=Homo sapiens GN=RPL4 PE=2 SV=1	37861	50	0.09	1(1)
Q14165	MLEC_HUMAN Malectin OS=Homo sapiens GN=MLEC PE=1 SV=1	32385	50	0.22	2(1)
Q3LIE7	Q3LIE7_HUMAN Putative uncharacterized protein Nbla03646 OS=Homo sapiens GN=Nbla03646 PE=2 SV=1	50031	50	0.07	1(1)
Q53HH2	Q53HH2_HUMAN Mitochondrial ATP synthase, O subunit variant (Fragment) OS=Homo sapiens PE=2 SV=1	23361	50	0.14	3(1)
Q5M7Z5	Q5M7Z5_HUMAN GRHPR protein (Fragment) OS=Homo sapiens GN=GRHPR PE=2 SV=1	37314	50	0.09	1(1)
A5YKK6	CNOT1_HUMAN CCR4-NOT transcription complex subunit 1 OS=Homo sapiens GN=CNOT1 PE=1 SV=2	269106	49	0.04	3(0)
A8K4D5	A8K4D5_HUMAN Kynureninase OS=Homo sapiens GN=KYNU PE=2 SV=1	52819	49	0.06	1(1)
D6R991	D6R991_HUMAN Matrin-3 (Fragment) OS=Homo sapiens GN=MATR3 PE=2 SV=1	48358	49	0.07	1(1)
F2YGG7	F2YGG7_HUMAN Epidermal growth factor receptor OS=Homo sapiens PE=2 SV=1	132588	49	0.05	2(1)
H0YCK7	H0YCK7_HUMAN Elongation factor 1-delta (Fragment) OS=Homo sapiens GN=EEF1D PE=4 SV=1	23105	49	0.15	1(1)
H7BZT7	H7BZT7_HUMAN S-formylglutathione hydrolase (Fragment) OS=Homo sapiens GN=ESD PE=4 SV=1	25806	49	0.13	1(1)
J3KP29	J3KP29_HUMAN Nuclear pore complex protein Nup98-Nup96 OS=Homo sapiens GN=NUP98 PE=4 SV=1	178260	49	0.02	1(1)
O75131	CPNE3_HUMAN Copine-3 OS=Homo sapiens GN=CPNE3 PE=1 SV=1	60947	49	0.11	2(1)
P23368	MAOM_HUMAN NAD-dependent malic enzyme, mitochondrial OS=Homo sapiens GN=ME2 PE=1 SV=1	66029	49	0.1	2(1)
P24534	EF1B_HUMAN Elongation factor 1-beta OS=Homo sapiens GN=EEF1B2 PE=1 SV=3	24919	49	0.46	3(0)
Q6LET3	Q6LET3_HUMAN HPRT1 protein (Fragment) OS=Homo sapiens GN=HPRT1 PE=2 SV=1	24801	49	0.14	1(1)
Q9UG63	ABCF2_HUMAN ATP-binding cassette sub-family F member 2 OS=Homo sapiens GN=ABCF2 PE=1 SV=2	71815	49	0.14	6(0)
A6NKB8	A6NKB8_HUMAN Aminopeptidase B OS=Homo sapiens GN=RNPEP PE=2 SV=1	68752	48	0.1	4(0)
B3KXU8	B3KXU8_HUMAN cDNA FLJ46087 fis, clone TESTI2009497, highly similar to GPI-anchored protein p137 OS=Homo sapiens PE=2 SV=1	70489	48	0.05	1(1)
B4DP65	B4DP65_HUMAN EMG1 nucleolar protein homolog (S. cerevisiae), isoform CRA_a OS=Homo sapiens GN=EMG1 PE=2 SV=1	15755	48	0.22	1(1)
G3XAM7	G3XAM7_HUMAN Catenin (Cadherin-associated protein), alpha 1, 102kDa, isoform CRA_a OS=Homo sapiens GN=CTNNA1 PE=2 SV=1	93576	48	0.07	3(1)
J3QSY3	J3QSY3_HUMAN Graves disease carrier protein OS=Homo sapiens GN=GDA PE=4 SV=1	46321	48	0.07	2(1)
K4DIA2	K4DIA2_HUMAN Mitochondrial glutamate carrier 1 (Fragment) OS=Homo sapiens GN=SLC25A22 PE=3 SV=1	12122	48	0.65	2(1)
P0C0S5	H2AZ_HUMAN Histone H2A.Z OS=Homo sapiens GN=H2AFZ PE=1 SV=2	13545	48	0.25	2(1)
P18206	VINC_HUMAN Vinculin OS=Homo sapiens GN=VCL PE=1 SV=4	124292	48	0.05	5(1)
P53618	COPB_HUMAN Coatomer subunit beta OS=Homo sapiens GN=COPB1 PE=1 SV=3	108214	48	0.16	6(0)
Q09161	NCBP1_HUMAN Nuclear cap-binding protein subunit 1 OS=Homo sapiens GN=NCBP1 PE=1 SV=1	92864	48	0.04	1(1)
Q5T6L4	Q5T6L4_HUMAN Argininosuccinate synthetase, isoform CRA_a OS=Homo sapiens GN=ASS PE=2 SV=1	46786	48	0.15	2(0)
Q6ZP35	Q6ZP35_HUMAN Annexin OS=Homo sapiens PE=2 SV=1	37147	48	0.41	4(0)
Q6ZTI3	Q6ZTI3_HUMAN cDNA FLJ44621 fis, clone BRACE2016896, highly similar to Lysyl-tRNA synthetase (EC 6.1.1.6) OS=Homo sapiens PE=2 SV=1	48790	48	0.22	3(0)
B3KSZ4	B3KSZ4_HUMAN cDNA FLJ37346 fis, clone BRAMY2021310, highly similar to Transcriptional repressor p66 beta OS=Homo sapiens PE=2 SV=1	65560	47	0.05	2(1)
D3YTB1	D3YTB1_HUMAN 60S ribosomal protein L32 (Fragment) OS=Homo sapiens GN=RPL32 PE=2 SV=1	15721	47	0.22	1(1)
F2Z2U8	F2Z2U8_HUMAN Myosin-14 OS=Homo sapiens GN=MYH14 PE=2 SV=1	232102	47	0.03	3(1)
F6S0T5	F6S0T5_HUMAN Lysine-specific histone demethylase 1A OS=Homo sapiens GN=KDM1A PE=2 SV=1	95677	47	0.03	1(1)
G1UI19	G1UI19_HUMAN Importin subunit alpha-7 (Fragment) OS=Homo sapiens GN=KPNA6 PE=2 SV=1	28256	47	0.12	3(0)
H0Y2W2	H0Y2W2_HUMAN ATPase family AAA domain-containing protein 3A (Fragment) OS=Homo sapiens GN=ATAD3A PE=4 SV=1	64600	47	0.1	2(2)
H0YDE4	H0YDE4_HUMAN Protein arginine N-methyltransferase 1 (Fragment) OS=Homo sapiens GN=PRMT1 PE=4 SV=1	27345	47	0.12	1(1)
J3KMX5	J3KMX5_HUMAN 40S ribosomal protein S13 OS=Homo sapiens GN=RPS13 PE=4 SV=1	16779	47	0.2	1(1)
Q5T9A4-2	ATD3B_HUMAN Isoform 2 of ATPase family AAA domain-containing protein 3B OS=Homo sapiens GN=ATAD3B	19781	47	0.17	1(1)
Q6DC98	Q6DC98_HUMAN LMNB1 protein (Fragment) OS=Homo sapiens GN=LMNB1 PE=2 SV=1	38289	47	0.09	1(1)
Q9BUN6	Q9BUN6_HUMAN MRPS30 protein (Fragment) OS=Homo sapiens GN=MRPS30 PE=2 SV=2	50543	47	0.07	1(1)
Q9H845	ACAD9_HUMAN Acyl-CoA dehydrogenase family member 9, mitochondrial OS=Homo sapiens GN=ACAD9 PE=1 SV=1	69344	47	0.1	2(1)
A0AVP6	A0AVP6_HUMAN UTS2 protein OS=Homo sapiens GN=UTS2 PE=3 SV=1	11158	46	0.31	2(1)
B2RAQ9	B2RAQ9_HUMAN Proteasome subunit beta type OS=Homo sapiens PE=2 SV=1	30254	46	0.11	3(1)
B3KRS5	B3KRS5_HUMAN Histone deacetylase OS=Homo sapiens GN=HDAC2 PE=2 SV=1	52479	46	0.06	2(1)
B4DDD8	B4DDD8_HUMAN Histidine--tRNA ligase, cytoplasmic OS=Homo sapiens GN=HARS PE=2 SV=1	49052	46	0.07	1(1)
B4DJE3	B4DJE3_HUMAN cDNA FLJ52929, highly similar to Dolichyl-diphosphooligosaccharide--proteinglycosyltransferase 48 kDa subunit (EC2.4.1.119) OS=Homo sapiens PE=2 SV=1	46620	46	0.07	1(1)
B7Z1X8	B7Z1X8_HUMAN cDNA FLJ55836, highly similar to Homo sapiens methionine adenosyltransferase II, beta (MAT2B), transcript variant 2, mRNA OS=Homo sapiens PE=2 SV=1	26340	46	0.13	1(1)
C9JBI3	C9JBI3_HUMAN Phosphoserine phosphatase (Fragment) OS=Homo sapiens GN=PSPH PE=2 SV=1	20903	46	0.16	1(1)
D3DXI9	D3DXI9_HUMAN Polymerase (DNA directed), epsilon, isoform CRA_a OS=Homo sapiens GN=POLE PE=2 SV=1	209711	46	0.02	1(1)
G3V4V5	G3V4V5_HUMAN E3 ubiquitin-protein ligase HECTD1 (Fragment) OS=Homo sapiens GN=HECTD1 PE=2 SV=1	103431	46	0.06	3(0)
H0YJV5	H0YJV5_HUMAN Kinectin (Fragment) OS=Homo sapiens GN=KTN1 PE=4 SV=1	10879	46	0.32	1(0)
H0YL50	H0YL50_HUMAN Cytoplasmic FMR1-interacting protein 1 (Fragment) OS=Homo sapiens GN=CYFIP1 PE=2 SV=1	20668	46	0.16	1(1)
H7C341	H7C341_HUMAN Splicing factor 3B subunit 1 (Fragment) OS=Homo sapiens GN=SF3B1 PE=4 SV=1	27657	46	0.26	2(1)
I3L397	I3L397_HUMAN Eukaryotic translation initiation factor 5A-1 (Fragment) OS=Homo sapiens GN=EIF5A PE=2 SV=1	16336	46	0.21	2(1)
J3KN36	J3KN36_HUMAN Nodal modulator 3 OS=Homo sapiens GN=NOMO3 PE=4 SV=1	140376	46	0.02	1(1)
O00232	PSD12_HUMAN 26S proteasome non-ATPase regulatory subunit 12 OS=Homo sapiens GN=PSMD12 PE=1 SV=3	53270	46	0.13	4(1)
O43837	IDH3B_HUMAN Isocitrate dehydrogenase [NAD] subunit beta, mitochondrial OS=Homo sapiens GN=IDH3B PE=1 SV=2	42442	46	0.08	1(1)
Q53FR4	Q53FR4_HUMAN Vacuolar protein sorting 35 variant (Fragment) OS=Homo sapiens PE=2 SV=1	92421	46	0.07	4(1)
Q68CR9	Q68CR9_HUMAN Aspartate--tRNA ligase, cytoplasmic OS=Homo sapiens GN=DKFZp781B11202 PE=2 SV=1	46084	46	0.15	4(0)
Q8WVF3	Q8WVF3_HUMAN RAB28 protein OS=Homo sapiens GN=RAB28 PE=2 SV=1	10716	46	0.33	1(1)
A8K9U0	A8K9U0_HUMAN cDNA FLJ78260, highly similar to Homo sapiens RNA binding motif protein 4, mRNA OS=Homo sapiens PE=2 SV=1	40658	45	0.08	1(1)
B0ZBD0	B0ZBD0_HUMAN 40S ribosomal protein S19 OS=Homo sapiens GN=RPS19 PE=2 SV=1	16051	45	0.21	1(1)
B2R6H7	B2R6H7_HUMAN cDNA, FLJ92955, highly similar to Homo sapiens transportin-SR (TRN-SR), mRNA OS=Homo sapiens PE=2 SV=1	105989	45	0.03	1(1)
B2R983	B2R983_HUMAN cDNA, FLJ94267, highly similar to Homo sapiens glutathione S-transferase omega 1 (GSTO1), mRNA OS=Homo sapiens PE=2 SV=1	27806	45	0.12	1(1)
B4DLI2	B4DLI2_HUMAN cDNA FLJ55714, highly similar to Dolichyl-diphosphooligosaccharide--protein glycosyltransferase 48 kDa subunit (EC 2.4.1.119) OS=Homo sapiens PE=2 SV=1	49120	45	0.14	2(1)
B4DVZ8	B4DVZ8_HUMAN cDNA FLJ52432, highly similar to Leukotriene A-4 hydrolase (EC 3.3.2.6) OS=Homo sapiens PE=2 SV=1	64246	45	0.1	2(0)
B4E1L0	B4E1L0_HUMAN Adenylosuccinate synthetase isozyme 2 OS=Homo sapiens GN=ADSS PE=2 SV=1	48308	45	0.07	1(1)
E1NZA1	E1NZA1_HUMAN Peroxisome proliferator activated receptor interacting complex protein OS=Homo sapiens GN=PRIC295 PE=2 SV=1	294953	45	0.02	5(1)
E7ERH3	E7ERH3_HUMAN Tensin-3 OS=Homo sapiens GN=TNS3 PE=2 SV=1	130127	45	0.03	1(1)
H0Y9H1	H0Y9H1_HUMAN Calnexin (Fragment) OS=Homo sapiens GN=CANX PE=3 SV=1	21748	45	0.54	4(0)
Q6FH49	Q6FH49_HUMAN NNMT protein OS=Homo sapiens GN=NNMT PE=2 SV=1	30011	45	0.37	3(1)
Q6NVY0	Q6NVY0_HUMAN Calcyclin binding protein OS=Homo sapiens GN=CACYBP PE=2 SV=1	26280	45	0.27	2(0)
B1AK13	B1AK13_HUMAN 3-hydroxymethyl-3-methylglutaryl-Coenzyme A lyase (Hydroxymethylglutaricaciduria), isoform CRA_b OS=Homo sapiens GN=HMGCL PE=2 SV=1	32171	44	0.1	1(1)
B3KMG5	B3KMG5_HUMAN cDNA FLJ10938 fis, clone OVARC1001038, highly similar to Protein ariadne-2 homolog OS=Homo sapiens PE=2 SV=1	50060	44	0.07	1(1)
B3KMV8	B3KMV8_HUMAN cDNA FLJ12766 fis, clone NT2RP2001520, highly similar to Calcium-binding mitochondrial carrier protein Aralar1 OS=Homo sapiens PE=2 SV=1	75130	44	0.09	3(0)
B3KVL0	B3KVL0_HUMAN cDNA FLJ16691 fis, clone TRACH3000692, highly similar to Paxillin OS=Homo sapiens PE=2 SV=1	65600	44	0.05	1(1)
B4DDC9	B4DDC9_HUMAN cDNA FLJ59448, highly similar to Trifunctional enzyme subunit beta, mitochondrial OS=Homo sapiens PE=2 SV=1	49937	44	0.07	1(1)
B4DEM9	B4DEM9_HUMAN cDNA FLJ52257, highly similar to Polymerase delta-interacting protein 2 OS=Homo sapiens PE=2 SV=1	40075	44	0.08	1(1)
B4DRY5	B4DRY5_HUMAN cDNA FLJ54538, highly similar to Transportin-2 OS=Homo sapiens PE=2 SV=1	101141	44	0.03	2(0)
B4DV47	B4DV47_HUMAN cDNA FLJ57893, highly similar to Parafibromin OS=Homo sapiens PE=2 SV=1	36029	44	0.19	2(1)
F5H740	F5H740_HUMAN Voltage-dependent anion-selective channel protein 3 OS=Homo sapiens GN=VDAC3 PE=2 SV=1	31080	44	0.23	2(0)
F8VQQ3	F8VQQ3_HUMAN UPF0160 protein MYG1, mitochondrial OS=Homo sapiens GN=C12orf10 PE=2 SV=1	34140	44	0.1	1(1)
H0Y503	H0Y503_HUMAN Basic leucine zipper and W2 domain-containing protein 1 (Fragment) OS=Homo sapiens GN=BZW1 PE=4 SV=1	15583	44	0.22	1(1)
H0YFF0	H0YFF0_HUMAN Probable cysteine--tRNA ligase, mitochondrial (Fragment) OS=Homo sapiens GN=CARS2 PE=4 SV=1	19735	44	0.17	1(1)
M0QXS5	M0QXS5_HUMAN Heterogeneous nuclear ribonucleoprotein L (Fragment) OS=Homo sapiens GN=HNRNPL PE=4 SV=1	59292	44	0.11	4(1)
P53396	ACLY_HUMAN ATP-citrate synthase OS=Homo sapiens GN=ACLY PE=1 SV=3	121674	44	0.03	1(1)
P61019	RAB2A_HUMAN Ras-related protein Rab-2A OS=Homo sapiens GN=RAB2A PE=1 SV=1	23702	44	0.3	3(0)
Q14166	TTL12_HUMAN Tubulin--tyrosine ligase-like protein 12 OS=Homo sapiens GN=TTLL12 PE=1 SV=2	75154	44	0.04	1(1)
Q8NBJ5	GT251_HUMAN Procollagen galactosyltransferase 1 OS=Homo sapiens GN=COLGALT1 PE=1 SV=1	71933	44	0.09	2(1)
Q9Y3I0	RTCB_HUMAN tRNA-splicing ligase RtcB homolog OS=Homo sapiens GN=C22orf28 PE=1 SV=1	55688	44	0.12	3(1)
B4DMY3	B4DMY3_HUMAN cDNA FLJ60713, highly similar to Homo sapiens heterogeneous nuclear ribonucleoprotein A/B (HNRPAB), transcript variant 1, mRNA OS=Homo sapiens PE=2 SV=1	35101	43	0.2	2(0)
B4DUI3	B4DUI3_HUMAN Eukaryotic translation initiation factor 3 subunit J OS=Homo sapiens GN=EIF3J PE=2 SV=1	22985	43	0.15	1(1)
B4DWV9	B4DWV9_HUMAN cDNA FLJ53108, highly similar to Guanine nucleotide-binding protein alpha-13 subunit OS=Homo sapiens PE=2 SV=1	41291	43	0.08	1(1)
B4E356	B4E356_HUMAN cDNA FLJ54993, highly similar to ATP-dependent DNA helicase 2 subunit 1 (EC 3.6.1.-) OS=Homo sapiens PE=2 SV=1	54646	43	0.12	2(1)
C9JPM4	C9JPM4_HUMAN ADP-ribosylation factor 4 (Fragment) OS=Homo sapiens GN=ARF4 PE=2 SV=1	14601	43	0.52	2(0)
F6SBX2	F6SBX2_HUMAN Isoleucine--tRNA ligase, mitochondrial OS=Homo sapiens GN=IARS2 PE=2 SV=1	106884	43	0.06	3(1)
H0Y7E8	H0Y7E8_HUMAN Guanine nucleotide-binding protein G(s) subunit alpha isoforms short (Fragment) OS=Homo sapiens GN=GNAS PE=4 SV=1	10552	43	0.33	1(1)
H0Y9R4	H0Y9R4_HUMAN 60S ribosomal protein L9 (Fragment) OS=Homo sapiens GN=RPL9 PE=4 SV=1	10264	43	0.34	1(1)
I0EZ68	I0EZ68_HUMAN Cell division cycle protein 27 (Fragment) OS=Homo sapiens GN=CDC27 PE=2 SV=1	11585	43	0.3	1(1)
I3L0N3	I3L0N3_HUMAN Vesicle-fusing ATPase OS=Homo sapiens GN=NSF PE=2 SV=1	82553	43	0.08	2(0)
K0J5S8	K0J5S8_HUMAN TRK-fused gene protein isoform 4 OS=Homo sapiens GN=TFG PE=2 SV=1	31016	43	0.11	1(1)
P51571	SSRD_HUMAN Translocon-associated protein subunit delta OS=Homo sapiens GN=SSR4 PE=1 SV=1	19158	43	0.18	1(1)
Q0P512	Q0P512_HUMAN Solute carrier family 2 (Facilitated glucose transporter), member 1 OS=Homo sapiens GN=SLC2A1 PE=2 SV=1	54361	43	0.12	2(0)
Q7Z2W4	ZCCHV_HUMAN Zinc finger CCCH-type antiviral protein 1 OS=Homo sapiens GN=ZC3HAV1 PE=1 SV=3	103135	43	0.06	2(1)
Q92917	GPKOW_HUMAN G patch domain and KOW motifs-containing protein OS=Homo sapiens GN=GPKOW PE=1 SV=2	52425	43	0.13	2(1)
Q9HA77	SYCM_HUMAN Probable cysteine--tRNA ligase, mitochondrial OS=Homo sapiens GN=CARS2 PE=1 SV=1	62698	43	0.11	2(1)
A0RZB8	A0RZB8_HUMAN Diaphanous-1 OS=Homo sapiens GN=DIAPH1 PE=2 SV=1	140767	42	0.02	2(1)
B3KM68	B3KM68_HUMAN cDNA FLJ10398 fis, clone NT2RM4000349, highly similar to Homo sapiens basic leucine zipper and W2 domains 2 (BZW2), mRNA OS=Homo sapiens PE=2 SV=1	48388	42	0.14	4(1)
B4DL14	B4DL14_HUMAN ATP synthase subunit gamma OS=Homo sapiens GN=ATP5C1 PE=2 SV=1	27552	42	0.26	2(0)
B4DQ15	B4DQ15_HUMAN cDNA FLJ51525, highly similar to Homo sapiens aldehyde dehydrogenase 16 family, member A1 (ALDH16A1), mRNA OS=Homo sapiens PE=2 SV=1	67899	42	0.05	1(1)
B4DWZ4	B4DWZ4_HUMAN Flap endonuclease 1 OS=Homo sapiens GN=FEN1 PE=2 SV=1	39109	42	0.18	2(0)
B4E3V2	B4E3V2_HUMAN cDNA FLJ52854, highly similar to Sequestosome-1 OS=Homo sapiens PE=2 SV=1	31979	42	0.1	1(1)
B5BU24	B5BU24_HUMAN 14-3-3 protein beta/alpha OS=Homo sapiens GN=YWHAB PE=2 SV=1	28209	42	0.25	4(0)
B5BUB5	B5BUB5_HUMAN Autoantigen La (Fragment) OS=Homo sapiens GN=SSB PE=2 SV=1	47009	42	0.07	1(1)
B7Z9W6	B7Z9W6_HUMAN cDNA, FLJ78980, highly similar to DnaJ homolog subfamily C member 7 OS=Homo sapiens PE=2 SV=1	50776	42	0.07	1(1)
D3DTH7	D3DTH7_HUMAN Myosin IC, isoform CRA_a OS=Homo sapiens GN=MYO1C PE=4 SV=1	99613	42	0.03	1(1)
F2ZC06	F2ZC06_HUMAN Thyroid hormone receptor interacting protein 6 isoform 1 OS=Homo sapiens GN=TRIP6i1 PE=2 SV=1	48967	42	0.07	1(1)
G3V359	G3V359_HUMAN DNA-(apurinic or apyrimidinic site) lyase (Fragment) OS=Homo sapiens GN=APEX1 PE=2 SV=1	19384	42	0.17	1(1)
H0Y579	H0Y579_HUMAN UV excision repair protein RAD23 homolog B (Fragment) OS=Homo sapiens GN=RAD23B PE=4 SV=1	12154	42	0.28	1(0)
H0Y8G5	H0Y8G5_HUMAN Heterogeneous nuclear ribonucleoprotein D0 (Fragment) OS=Homo sapiens GN=HNRNPD PE=2 SV=1	29877	42	0.11	1(1)
H3BP35	H3BP35_HUMAN Diphosphomevalonate decarboxylase (Fragment) OS=Homo sapiens GN=MVD PE=2 SV=1	29759	42	0.11	1(1)
J3KRE2	J3KRE2_HUMAN Rho GDP-dissociation inhibitor 1 OS=Homo sapiens GN=ARHGDIA PE=4 SV=1	14805	42	0.23	1(1)
L0R512	L0R512_HUMAN Alternative protein NCAM2 OS=Homo sapiens GN=NCAM2 PE=4 SV=1	4789	42	0.77	1(1)
O76003	GLRX3_HUMAN Glutaredoxin-3 OS=Homo sapiens GN=GLRX3 PE=1 SV=2	37693	42	0.09	2(1)
P41250	SYG_HUMAN Glycine--tRNA ligase OS=Homo sapiens GN=GARS PE=1 SV=3	83854	42	0.08	3(0)
Q2L6I2	Q2L6I2_HUMAN ABC50 protein OS=Homo sapiens GN=ABCF1 PE=2 SV=1	92080	42	0.07	2(0)
Q7L5L3	GDPD3_HUMAN Glycerophosphodiester phosphodiesterase domain-containing protein 3 OS=Homo sapiens GN=GDPD3 PE=2 SV=3	36972	42	0.09	1(1)
Q8NBX0	SCPDL_HUMAN Saccharopine dehydrogenase-like oxidoreductase OS=Homo sapiens GN=SCCPDH PE=1 SV=1	47464	42	0.22	3(0)
Q9NR30	DDX21_HUMAN Nucleolar RNA helicase 2 OS=Homo sapiens GN=DDX21 PE=1 SV=5	87804	42	0.08	2(1)
A0MZ66	SHOT1_HUMAN Shootin-1 OS=Homo sapiens GN=KIAA1598 PE=1 SV=4	72109	41	0.05	1(1)
B3KSQ7	B3KSQ7_HUMAN Drebrin 1, isoform CRA_d OS=Homo sapiens GN=DBN1 PE=2 SV=1	66053	41	0.05	1(1)
G3V0J0	G3V0J0_HUMAN Fragile X mental retardation 1, isoform CRA_e OS=Homo sapiens GN=FMR1 PE=2 SV=1	67030	41	0.05	1(1)
G3V1S6	G3V1S6_HUMAN Polypeptide N-acetylgalactosaminyltransferase 2 soluble form OS=Homo sapiens GN=GALNT2 PE=2 SV=1	61440	41	0.05	1(1)
H0Y6E7	H0Y6E7_HUMAN RNA-binding motif protein, X chromosome, N-terminally processed (Fragment) OS=Homo sapiens GN=RBMX PE=4 SV=2	31837	41	0.22	2(0)
K7EJ44	K7EJ44_HUMAN Profilin 1, isoform CRA_b OS=Homo sapiens GN=PFN1 PE=4 SV=1	11497	41	0.3	2(1)
K7EJT5	K7EJT5_HUMAN 60S ribosomal protein L22 (Fragment) OS=Homo sapiens GN=RPL22 PE=4 SV=1	5080	41	0.72	2(1)
Q4W5I3	Q4W5I3_HUMAN Putative uncharacterized protein ABCG2 (Fragment) OS=Homo sapiens GN=ABCG2 PE=2 SV=1	67328	41	0.05	1(1)
Q6AWA7	Q6AWA7_HUMAN Putative uncharacterized protein DKFZp686J1525 (Fragment) OS=Homo sapiens GN=DKFZp686J1525 PE=2 SV=1	52127	41	0.06	1(1)
Q6XQN6	PNCB_HUMAN Nicotinate phosphoribosyltransferase OS=Homo sapiens GN=NAPRT1 PE=1 SV=2	58112	41	0.12	2(0)
A0S2P1	A0S2P1_HUMAN Cytochrome c oxidase subunit 2 OS=Homo sapiens GN=COX2 PE=3 SV=1	25689	40	0.13	2(1)
A6NJ11	A6NJ11_HUMAN Ubiquitin fusion degradation protein 1 homolog OS=Homo sapiens GN=UFD1L PE=2 SV=1	33585	40	0.1	1(1)
A8K8N7	A8K8N7_HUMAN Phosphoribosylformylglycinamidine synthase (FGAR amidotransferase), isoform CRA_b OS=Homo sapiens GN=PFAS PE=2 SV=1	146286	40	0.05	2(0)
B2RNG4	B2RNG4_HUMAN Protein TRIM6-TRIM34 OS=Homo sapiens GN=TRIM6-TRIM34 PE=2 SV=1	99833	40	0.03	2(1)
B4DMB5	B4DMB5_HUMAN cDNA FLJ60075, highly similar to CTP synthase 1 (EC 6.3.4.2) OS=Homo sapiens PE=2 SV=1	56542	40	0.12	2(1)
B4DND6	B4DND6_HUMAN cDNA FLJ55804, highly similar to COP9 signalosome complex subunit 1 OS=Homo sapiens PE=2 SV=1	55205	40	0.06	1(1)
B4DPH9	B4DPH9_HUMAN cDNA FLJ55895, highly similar to Ras-related protein Rab-7 OS=Homo sapiens PE=2 SV=1	22144	40	0.15	1(1)
B4DPJ2	B4DPJ2_HUMAN Annexin OS=Homo sapiens PE=2 SV=1	46025	40	0.15	2(0)
D6R9Y6	D6R9Y6_HUMAN Septin-11 (Fragment) OS=Homo sapiens GN=SEPT11 PE=2 SV=1	15446	40	0.22	1(1)
D6RA73	D6RA73_HUMAN Stress-70 protein, mitochondrial (Fragment) OS=Homo sapiens GN=HSPA9 PE=2 SV=1	6805	40	0.53	1(0)
F5GYT3	F5GYT3_HUMAN Lysophospholipid acyltransferase 5 OS=Homo sapiens GN=LPCAT3 PE=2 SV=1	22378	40	0.15	1(1)
G3V1N8	G3V1N8_HUMAN Vacuolar protein sorting 26 homolog A (Yeast), isoform CRA_a OS=Homo sapiens GN=VPS26A PE=2 SV=1	25547	40	0.13	1(0)
G3V5X4	G3V5X4_HUMAN Nesprin-2 OS=Homo sapiens GN=SYNE2 PE=2 SV=1	793672	40	0	6(1)
G9LKX8	G9LKX8_HUMAN Cytochrome c oxidase subunit 2 OS=Homo sapiens GN=COX2 PE=3 SV=1	25719	40	0.13	2(1)
H0YCT5	H0YCT5_HUMAN Histone-binding protein RBBP4 (Fragment) OS=Homo sapiens GN=RBBP4 PE=2 SV=1	20356	40	0.17	1(1)
H0YDX7	H0YDX7_HUMAN HBS1-like protein (Fragment) OS=Homo sapiens GN=HBS1L PE=2 SV=1	61030	40	0.05	1(0)
H9T3W9	H9T3W9_HUMAN Cytochrome c oxidase subunit 2 OS=Homo sapiens GN=COX2 PE=3 SV=1	25729	40	0.13	2(1)
I3L1E8	I3L1E8_HUMAN Mitochondrial dicarboxylate carrier (Fragment) OS=Homo sapiens GN=SLC25A10 PE=3 SV=1	12410	40	0.28	1(1)
O43286	B4GT5_HUMAN Beta-1,4-galactosyltransferase 5 OS=Homo sapiens GN=B4GALT5 PE=2 SV=1	45318	40	0.07	1(1)
P54136	SYRC_HUMAN Arginine--tRNA ligase, cytoplasmic OS=Homo sapiens GN=RARS PE=1 SV=2	76129	40	0.13	4(0)
Q0QEY7	Q0QEY7_HUMAN Succinate dehydrogenase complex subunit B (Fragment) OS=Homo sapiens GN=SDHB PE=2 SV=1	29686	40	0.11	1(1)
Q4GCC3	Q4GCC3_HUMAN Cytochrome c oxidase subunit 2 OS=Homo sapiens GN=COII PE=3 SV=1	25718	40	0.13	2(1)
Q8NCM2	KCNH5_HUMAN Potassium voltage-gated channel subfamily H member 5 OS=Homo sapiens GN=KCNH5 PE=1 SV=3	112946	40	0.03	1(1)
Q92526	TCPW_HUMAN T-complex protein 1 subunit zeta-2 OS=Homo sapiens GN=CCT6B PE=1 SV=5	58355	40	0.06	2(1)
Q96ER9	CCD51_HUMAN Coiled-coil domain-containing protein 51 OS=Homo sapiens GN=CCDC51 PE=1 SV=2	46011	40	0.07	2(0)
Q9NQH7	XPP3_HUMAN Probable Xaa-Pro aminopeptidase 3 OS=Homo sapiens GN=XPNPEP3 PE=1 SV=1	57624	40	0.06	1(1)
Q9UBK8	MTRR_HUMAN Methionine synthase reductase OS=Homo sapiens GN=MTRR PE=1 SV=3	81386	40	0.08	2(1)
B2R5P7	B2R5P7_HUMAN cDNA, FLJ92558, highly similar to Homo sapiens pyruvate dehydrogenase (lipoamide) alpha 1 (PDHA1), mRNA OS=Homo sapiens PE=2 SV=1	44024	39	0.07	3(1)
B2RPK0	HGB1A_HUMAN Putative high mobility group protein B1-like 1 OS=Homo sapiens GN=HMGB1P1 PE=5 SV=1	24394	39	0.14	1(1)
B3KMB1	B3KMB1_HUMAN Structural maintenance of chromosomes protein OS=Homo sapiens PE=2 SV=1	136030	39	0.07	4(1)
B3KRB2	B3KRB2_HUMAN cDNA FLJ33964 fis, clone CTONG2019029, highly similar to Pseudouridylate synthase 7 homolog (EC 5.4.99.-) OS=Homo sapiens PE=2 SV=1	75303	39	0.04	3(1)
B4DJW8	B4DJW8_HUMAN cDNA FLJ55697, highly similar to Protein transport protein Sec23B OS=Homo sapiens PE=2 SV=1	85347	39	0.04	1(1)
D0PNI1	D0PNI1_HUMAN Tyrosine 3-monooxygenase/tryptophan 5-monooxygenase activation protein zeta polypeptide OS=Homo sapiens GN=YWHAZ PE=2 SV=1	27899	39	0.12	2(1)
F8VR82	F8VR82_HUMAN Serine/threonine-protein phosphatase OS=Homo sapiens GN=PPP1CC PE=2 SV=1	31765	39	0.1	1(1)
G3V4F7	G3V4F7_HUMAN Signal recognition particle 54 kDa protein OS=Homo sapiens GN=SRP54 PE=2 SV=1	48867	39	0.07	1(1)
J3KN29	J3KN29_HUMAN 26S proteasome non-ATPase regulatory subunit 9 OS=Homo sapiens GN=PSMD9 PE=4 SV=1	24709	39	0.14	1(1)
J3KSI8	J3KSI8_HUMAN 28S ribosomal protein S7, mitochondrial (Fragment) OS=Homo sapiens GN=MRPS7 PE=4 SV=1	18488	39	0.18	1(1)
O14660	O14660_HUMAN GARS-AIRS-GART (Fragment) OS=Homo sapiens PE=2 SV=1	10783	39	0.32	2(1)
O43776	SYNC_HUMAN Asparagine--tRNA ligase, cytoplasmic OS=Homo sapiens GN=NARS PE=1 SV=1	63758	39	0.11	3(0)
P0CG22	DR4L1_HUMAN Putative dehydrogenase/reductase SDR family member 4-like 2 OS=Homo sapiens GN=DHRS4L1 PE=5 SV=1	30816	39	0.11	1(1)
Q92900	RENT1_HUMAN Regulator of nonsense transcripts 1 OS=Homo sapiens GN=UPF1 PE=1 SV=2	125578	39	0.03	1(0)
A4D198	A4D198_HUMAN Similar to mKIAA0038 protein OS=Homo sapiens GN=LOC392647 PE=4 SV=1	32698	38	0.1	1(0)
B0S7P4	B0S7P4_HUMAN cDNA, FLJ92156, Homo sapiens mitochondrial ribosomal protein S18B (MRPS18B),nuclear gene encoding mitochondrial protein, mRNA OS=Homo sapiens PE=2 SV=1	29719	38	0.11	1(1)
B2R7B5	B2R7B5_HUMAN cDNA, FLJ93365, highly similar to Homo sapiens KH domain containing, RNA binding, signal transduction associated 1 (KHDRBS1), mRNA OS=Homo sapiens PE=2 SV=1	48309	38	0.07	1(1)
B2R8G6	B2R8G6_HUMAN cDNA, FLJ93891, Homo sapiens FK506 binding protein 8, 38kDa (FKBP8), mRNA OS=Homo sapiens PE=2 SV=1	38870	38	0.09	1(0)
B2RB90	B2RB90_HUMAN cDNA, FLJ95375, highly similar to Homo sapiens glutamine-fructose-6-phosphate transaminase 2 (GFPT2), mRNA OS=Homo sapiens PE=2 SV=1	77651	38	0.04	1(1)
B2RDF5	B2RDF5_HUMAN cDNA, FLJ96587, highly similar to Homo sapiens SUMO-1 activating enzyme subunit 2 (UBA2), mRNA OS=Homo sapiens PE=2 SV=1	71705	38	0.05	1(1)
B3KN06	B3KN06_HUMAN Coronin OS=Homo sapiens PE=2 SV=1	53874	38	0.06	1(1)
B3KY61	B3KY61_HUMAN cDNA FLJ16787 fis, clone PLACE6013222, weakly similar to Mus musculus RNA binding motif protein 26 (Rbm26), mRNA (Fragment) OS=Homo sapiens PE=2 SV=1	89204	38	0.04	1(0)
B4DF96	B4DF96_HUMAN Eukaryotic translation initiation factor 2 subunit 1 OS=Homo sapiens GN=EIF2A PE=2 SV=1	58357	38	0.06	3(0)
B4DS71	B4DS71_HUMAN cDNA FLJ57081, moderately similar to WD repeat protein 1 OS=Homo sapiens PE=2 SV=1	22638	38	0.32	1(0)
B4DZK8	B4DZK8_HUMAN cDNA FLJ61192, highly similar to Erythrocyte band 7 integral membrane protein OS=Homo sapiens PE=2 SV=1	30985	38	0.11	4(0)
B7Z1R5	B7Z1R5_HUMAN V-type proton ATPase catalytic subunit A OS=Homo sapiens GN=ATP6V1A PE=2 SV=1	65037	38	0.05	1(1)
D3DQY6	D3DQY6_HUMAN Tumor susceptibility gene 101, isoform CRA_a OS=Homo sapiens GN=TSG101 PE=2 SV=1	29059	38	0.11	1(1)
G5E9Q2	G5E9Q2_HUMAN Cold shock domain containing E1, RNA-binding, isoform CRA_d OS=Homo sapiens GN=CSDE1 PE=2 SV=1	94539	38	0.03	1(0)
H0YD73	H0YD73_HUMAN 26S proteasome non-ATPase regulatory subunit 13 (Fragment) OS=Homo sapiens GN=PSMD13 PE=4 SV=1	25299	38	0.13	1(1)
J3KRZ4	J3KRZ4_HUMAN L-xylulose reductase (Fragment) OS=Homo sapiens GN=DCXR PE=3 SV=1	15111	38	0.23	1(1)
O43488	ARK72_HUMAN Aflatoxin B1 aldehyde reductase member 2 OS=Homo sapiens GN=AKR7A2 PE=1 SV=3	40020	38	0.08	1(0)
O94906	PRP6_HUMAN Pre-mRNA-processing factor 6 OS=Homo sapiens GN=PRPF6 PE=1 SV=1	107656	38	0.03	1(1)
Q1KLZ6	Q1KLZ6_HUMAN Signal transducer and activator of transcription 5A OS=Homo sapiens GN=STAT5A PE=2 SV=1	87351	38	0.04	1(0)
Q5JNZ5	RS26L_HUMAN Putative 40S ribosomal protein S26-like 1 OS=Homo sapiens GN=RPS26P11 PE=5 SV=1	13336	38	0.26	2(1)
Q5SYT8	Q5SYT8_HUMAN Protein NAMPTL (Fragment) OS=Homo sapiens GN=NAMPTL PE=2 SV=1	53645	38	0.06	3(0)
Q5TA95	Q5TA95_HUMAN Tetratricopeptide repeat domain 4, isoform CRA_a OS=Homo sapiens GN=TTC4 PE=2 SV=1	46179	38	0.07	1(1)
Q6IBN4	Q6IBN4_HUMAN PECI protein OS=Homo sapiens GN=PECI PE=2 SV=1	40510	38	0.08	2(1)
B3KU41	B3KU41_HUMAN cDNA FLJ39170 fis, clone OCBBF2003028, highly similar to Rattus norvegicus basic leucine zipper and W2 domains 1 (Bzw1), mRNA OS=Homo sapiens PE=2 SV=1	24570	37	0.14	1(0)
B7Z478	B7Z478_HUMAN Proteasome (Prosome, macropain) subunit, beta type, 2, isoform CRA_b OS=Homo sapiens GN=PSMB2 PE=2 SV=1	20365	37	0.17	1(1)
B7Z4C7	B7Z4C7_HUMAN cDNA FLJ57321, moderately similar to Moesin OS=Homo sapiens PE=2 SV=1	23899	37	0.14	1(0)
B7ZKL7	B7ZKL7_HUMAN Lon protease homolog 2, peroxisomal OS=Homo sapiens GN=LONP2 PE=2 SV=1	90117	37	0.04	2(1)
C9JLM5	C9JLM5_HUMAN Serpin B5 (Fragment) OS=Homo sapiens GN=SERPINB5 PE=2 SV=1	14463	37	0.24	2(0)
D3DTY9	D3DTY9_HUMAN Tripartite motif-containing 25, isoform CRA_a OS=Homo sapiens GN=TRIM25 PE=4 SV=1	48358	37	0.07	1(0)
D6RDU5	D6RDU5_HUMAN Septin-11 (Fragment) OS=Homo sapiens GN=SEPT11 PE=2 SV=1	43371	37	0.16	2(1)
E7ENU7	E7ENU7_HUMAN Ribosomal protein L15 (Fragment) OS=Homo sapiens GN=RPL15 PE=2 SV=1	20596	37	0.16	2(0)
E7EQ61	E7EQ61_HUMAN Ubiquitin-like modifier-activating enzyme 5 OS=Homo sapiens GN=UBA5 PE=2 SV=1	42280	37	0.08	1(1)
G3V210	G3V210_HUMAN 60S acidic ribosomal protein P0 OS=Homo sapiens GN=RPLP0 PE=2 SV=1	18373	37	0.18	1(1)
H0Y4R2	H0Y4R2_HUMAN NADPH--cytochrome P450 reductase (Fragment) OS=Homo sapiens GN=POR PE=4 SV=1	82441	37	0.04	1(1)
M0QZC5	M0QZC5_HUMAN 40S ribosomal protein S11 OS=Homo sapiens GN=RPS11 PE=4 SV=1	14103	37	0.24	1(0)
M0QZT4	M0QZT4_HUMAN Calcium-binding mitochondrial carrier protein SCaMC-3 (Fragment) OS=Homo sapiens GN=SLC25A23 PE=3 SV=1	31063	37	0.11	1(1)
O15427	MOT4_HUMAN Monocarboxylate transporter 4 OS=Homo sapiens GN=SLC16A3 PE=1 SV=1	50064	37	0.07	1(0)
Q14315	FLNC_HUMAN Filamin-C OS=Homo sapiens GN=FLNC PE=1 SV=3	293407	37	0.02	4(0)
Q8N1G4	LRC47_HUMAN Leucine-rich repeat-containing protein 47 OS=Homo sapiens GN=LRRC47 PE=1 SV=1	64004	37	0.05	1(1)
Q9NQR4	NIT2_HUMAN Omega-amidase NIT2 OS=Homo sapiens GN=NIT2 PE=1 SV=1	30988	37	0.11	2(0)
A5PLK7	A5PLK7_HUMAN RCC2 protein (Fragment) OS=Homo sapiens GN=RCC2 PE=2 SV=1	50331	36	0.07	4(0)
B2R4C1	B2R4C1_HUMAN cDNA, FLJ92036, highly similar to Homo sapiens ribosomal protein L31 (RPL31), mRNA OS=Homo sapiens PE=2 SV=1	14486	36	0.23	1(0)
B3KTN5	B3KTN5_HUMAN cDNA FLJ38538 fis, clone HCHON2001407, highly similar to LanC-like protein 2 OS=Homo sapiens PE=2 SV=1	51676	36	0.06	1(0)
D3DWB6	D3DWB6_HUMAN Ubiquitin carboxyl-terminal hydrolase OS=Homo sapiens GN=USP9X PE=2 SV=1	274331	36	0.01	2(0)
E5KMT5	E5KMT5_HUMAN tRNA pseudouridine synthase OS=Homo sapiens PE=2 SV=1	48010	36	0.07	1(0)
F1T0A4	F1T0A4_HUMAN U4/U6 small nuclear ribonucleoprotein Prp31 OS=Homo sapiens GN=PRPF31 PE=2 SV=1	55217	36	0.06	2(0)
F5H037	F5H037_HUMAN Serine/threonine-protein phosphatase PP1-alpha catalytic subunit (Fragment) OS=Homo sapiens GN=PPP1CA PE=2 SV=1	19629	36	0.17	1(0)
G4XXL9	G4XXL9_HUMAN Cytochrome c OS=Homo sapiens GN=CYCS PE=2 SV=1	11855	36	0.29	1(1)
G5EA24	G5EA24_HUMAN Mucolipin 2, isoform CRA_a OS=Homo sapiens GN=MCOLN2 PE=2 SV=1	29581	36	0.12	1(1)
H0Y4J2	H0Y4J2_HUMAN 39S ribosomal protein L37, mitochondrial (Fragment) OS=Homo sapiens GN=MRPL37 PE=4 SV=1	29806	36	0.11	1(0)
H0YH81	H0YH81_HUMAN ATP synthase subunit beta (Fragment) OS=Homo sapiens GN=ATP5B PE=3 SV=1	38226	36	0.09	1(0)
M0R181	M0R181_HUMAN 60S ribosomal protein L21 (Fragment) OS=Homo sapiens GN=RPL21 PE=4 SV=1	14197	36	0.24	2(0)
O43423	AN32C_HUMAN Acidic leucine-rich nuclear phosphoprotein 32 family member C OS=Homo sapiens GN=ANP32C PE=2 SV=1	26917	36	0.12	2(0)
P31689	DNJA1_HUMAN DnaJ homolog subfamily A member 1 OS=Homo sapiens GN=DNAJA1 PE=1 SV=2	45581	36	0.15	3(0)
Q5TCU6	Q5TCU6_HUMAN Talin-1 OS=Homo sapiens GN=TLN1 PE=2 SV=1	260030	36	0.01	2(0)
Q96LK9	Q96LK9_HUMAN cDNA FLJ25413 fis, clone TST03402, highly similar to 3-OXO-5-BETA-STEROID 4-DEHYDROGENASE (EC 1.3.99.6) OS=Homo sapiens PE=2 SV=1	16911	36	0.2	1(0)
A8K4T6	A8K4T6_HUMAN cDNA FLJ76282, highly similar to Homo sapiens proteasome (prosome, macropain) 26S subunit, non-ATPase, 5 (PSMD5), mRNA OS=Homo sapiens PE=2 SV=1	56588	35	0.06	3(0)
B0V0F8	B0V0F8_HUMAN Putative pre-mRNA-splicing factor ATP-dependent RNA helicase DHX16 (Fragment) OS=Homo sapiens GN=DHX16 PE=2 SV=1	77228	35	0.09	2(0)
B1AHB0	B1AHB0_HUMAN MCM5 minichromosome maintenance deficient 5, cell division cycle 46 (S. cerevisiae), isoform CRA_a OS=Homo sapiens GN=MCM5 PE=2 SV=1	83031	35	0.08	2(0)
B2R5V9	B2R5V9_HUMAN cDNA, FLJ92652, highly similar to Homo sapiens high density lipoprotein binding protein (vigilin)(HDLBP), mRNA OS=Homo sapiens PE=2 SV=1	141919	35	0.05	3(0)
B2RD07	B2RD07_HUMAN cDNA, FLJ96404 OS=Homo sapiens PE=2 SV=1	49224	35	0.07	2(1)
B2RDR4	B2RDR4_HUMAN cDNA, FLJ96732, highly similar to Homo sapiens testis derived transcript (3 LIM domains) (TES), transcript variant 1, mRNA OS=Homo sapiens PE=2 SV=1	49759	35	0.07	1(0)
B3KNN7	B3KNN7_HUMAN cDNA FLJ30049 fis, clone ADRGL1000033, highly similar to 26S proteasome non-ATPase regulatory subunit 3 OS=Homo sapiens PE=2 SV=1	57311	35	0.12	4(0)
B3KWN9	B3KWN9_HUMAN cDNA FLJ43475 fis, clone OCBBF2038317, highly similar to VPS10 domain-containing receptor SorCS1 OS=Homo sapiens PE=2 SV=1	126939	35	0.03	1(0)
B3KXN5	B3KXN5_HUMAN cDNA FLJ45768 fis, clone NETRP2000961, highly similar to Cytosolic purine 5~-nucleotidase (EC 3.1.3.5) OS=Homo sapiens PE=2 SV=1	47162	35	0.07	1(1)
B4DDN1	B4DDN1_HUMAN Glutaminyl-tRNA synthetase, isoform CRA_a OS=Homo sapiens GN=QARS PE=2 SV=1	72548	35	0.09	3(0)
B4DEM8	B4DEM8_HUMAN cDNA FLJ50118, highly similar to Splicing factor, arginine/serine-rich 4 OS=Homo sapiens PE=2 SV=1	18388	35	0.18	2(0)
B4DFP1	B4DFP1_HUMAN cDNA FLJ51818, highly similar to Phosphoglucomutase-1 (EC 5.4.2.2) OS=Homo sapiens PE=2 SV=1	58987	35	0.06	1(0)
B4DM31	B4DM31_HUMAN cDNA FLJ54022, highly similar to Exportin-2 OS=Homo sapiens PE=2 SV=1	86605	35	0.12	5(0)
H7C0R7	H7C0R7_HUMAN NADH-cytochrome b5 reductase 1 (Fragment) OS=Homo sapiens GN=CYB5R1 PE=4 SV=1	25060	35	0.13	1(0)
H7C446	H7C446_HUMAN Suppressor of SWI4 1 homolog (Fragment) OS=Homo sapiens GN=PPAN PE=4 SV=1	23262	35	0.14	1(0)
I6L8E2	I6L8E2_HUMAN Multicilin OS=Homo sapiens GN=MCIDAS PE=4 SV=1	19069	35	0.17	1(1)
P15924	DESP_HUMAN Desmoplakin OS=Homo sapiens GN=DSP PE=1 SV=3	334021	35	0.03	6(0)
P62263	RS14_HUMAN 40S ribosomal protein S14 OS=Homo sapiens GN=RPS14 PE=1 SV=3	16434	35	0.21	1(0)
Q0D2M2	Q0D2M2_HUMAN HIST1H2BC protein OS=Homo sapiens GN=HIST1H2BC PE=2 SV=1	13826	35	0.55	5(1)
Q13380	Q13380_HUMAN RNA binding motif (Fragment) OS=Homo sapiens GN=RBM PE=4 SV=1	4015	35	0.97	1(1)
Q53FT8	Q53FT8_HUMAN Proteasome subunit beta type (Fragment) OS=Homo sapiens PE=2 SV=1	26702	35	0.26	2(0)
Q59H95	Q59H95_HUMAN Flightless I homolog variant (Fragment) OS=Homo sapiens PE=2 SV=1	126396	35	0.05	3(0)
Q68DB1	Q68DB1_HUMAN Metastasis-associated protein MTA2 OS=Homo sapiens GN=DKFZp686F2281 PE=2 SV=1	55515	35	0.06	1(0)
Q9Y266	NUDC_HUMAN Nuclear migration protein nudC OS=Homo sapiens GN=NUDC PE=1 SV=1	38276	35	0.09	1(0)
B2R7V4	B2R7V4_HUMAN cDNA, FLJ93619, highly similar to Homo sapiens PRP4 pre-mRNA processing factor 4 homolog (yeast) (PRPF4), mRNA OS=Homo sapiens PE=2 SV=1	59097	34	0.06	1(0)
B2RB23	B2RB23_HUMAN cDNA, FLJ95265, highly similar to Homo sapiens acetyl-Coenzyme A acyltransferase 2 (mitochondrial 3-oxoacyl-Coenzyme A thiolase) (ACAA2), nuclear gene encoding mitochondrial protein, mRNA OS=Homo sapiens PE=2 SV=1	42439	34	0.16	2(1)
B2RE46	B2RE46_HUMAN cDNA, FLJ96923, highly similar to Homo sapiens ribophorin II (RPN2), mRNA OS=Homo sapiens PE=2 SV=1	69405	34	0.05	1(0)
B2RWN4	B2RWN4_HUMAN TUBGCP6 protein OS=Homo sapiens GN=TUBGCP6 PE=2 SV=1	201427	34	0.02	1(0)
B3KQQ3	B3KQQ3_HUMAN cDNA PSEC0016 fis, clone NT2RM1001076, highly similar to Procollagen-lysine,2-oxoglutarate 5-dioxygenase 3 (EC 1.14.11.4) OS=Homo sapiens PE=2 SV=1	85161	34	0.08	2(0)
B3KUV5	B3KUV5_HUMAN cDNA FLJ40710 fis, clone THYMU2027125, highly similar to Ubiquitin thioesterase protein OTUB1 (EC 3.4.-.-) OS=Homo sapiens PE=2 SV=1	35690	34	0.09	1(0)
B3KUZ8	B3KUZ8_HUMAN Aspartate aminotransferase OS=Homo sapiens PE=2 SV=1	41699	34	0.08	2(1)
B4DE72	B4DE72_HUMAN cDNA FLJ50078, highly similar to Nuclear pore complex protein Nup205 OS=Homo sapiens PE=2 SV=1	106663	34	0.06	2(0)
B4DF80	B4DF80_HUMAN cDNA FLJ58527, highly similar to Nucleolar protein 6 OS=Homo sapiens PE=2 SV=1	122714	34	0.03	1(0)
B4E2I4	B4E2I4_HUMAN cDNA FLJ58227, highly similar to Glutamate--cysteine ligase catalytic subunit (EC 6.3.2.2) OS=Homo sapiens PE=2 SV=1	67219	34	0.1	3(0)
C9JNW5	C9JNW5_HUMAN 60S ribosomal protein L24 OS=Homo sapiens GN=RPL24 PE=2 SV=1	17646	34	0.19	1(0)
F5GXD8	F5GXD8_HUMAN Stress-induced-phosphoprotein 1 OS=Homo sapiens GN=STIP1 PE=2 SV=1	15799	34	0.22	2(0)
H0Y400	H0Y400_HUMAN Spliceosome RNA helicase DDX39B (Fragment) OS=Homo sapiens GN=DDX39B PE=4 SV=1	21834	34	0.15	1(1)
H0YEN5	H0YEN5_HUMAN 40S ribosomal protein S2 (Fragment) OS=Homo sapiens GN=RPS2 PE=2 SV=1	21426	34	0.16	1(1)
H0YJM8	H0YJM8_HUMAN Proteasome subunit beta type-5 (Fragment) OS=Homo sapiens GN=PSMB5 PE=3 SV=1	13021	34	0.26	1(0)
H3BU82	H3BU82_HUMAN Aladin (Fragment) OS=Homo sapiens GN=AAAS PE=2 SV=1	39235	34	0.18	2(0)
I3L1H6	I3L1H6_HUMAN Aldehyde dehydrogenase, dimeric NADP-preferring (Fragment) OS=Homo sapiens GN=ALDH3A1 PE=2 SV=1	15021	34	0.23	1(1)
I3L1L3	I3L1L3_HUMAN Myb-binding protein 1A (Fragment) OS=Homo sapiens GN=MYBBP1A PE=4 SV=1	141124	34	0.02	1(0)
P42126	ECI1_HUMAN Enoyl-CoA delta isomerase 1, mitochondrial OS=Homo sapiens GN=ECI1 PE=1 SV=1	33080	34	0.21	2(0)
P52597	HNRPF_HUMAN Heterogeneous nuclear ribonucleoprotein F OS=Homo sapiens GN=HNRNPF PE=1 SV=3	45985	34	0.07	1(0)
Q2TSD2	Q2TSD2_HUMAN Aging-associated gene 7 protein OS=Homo sapiens PE=2 SV=1	41778	34	0.08	1(0)
Q6FHF5	Q6FHF5_HUMAN Proliferating cell nuclear antigen (Fragment) OS=Homo sapiens GN=PCNA PE=2 SV=1	29029	34	0.11	1(0)
Q96I24	FUBP3_HUMAN Far upstream element-binding protein 3 OS=Homo sapiens GN=FUBP3 PE=1 SV=2	61944	34	0.05	3(0)
A0PJ92	A0PJ92_HUMAN NOP56 protein (Fragment) OS=Homo sapiens GN=NOP56 PE=2 SV=1	50068	33	0.07	1(0)
A8K766	A8K766_HUMAN cDNA FLJ77343, highly similar to Homo sapiens electron-transfer-flavoprotein, beta polypeptide(ETFB), mRNA OS=Homo sapiens PE=2 SV=1	28132	33	0.12	1(1)
B2R642	B2R642_HUMAN cDNA, FLJ92775, highly similar to Homo sapiens melanoma cell adhesion molecule (MCAM), mRNA OS=Homo sapiens PE=2 SV=1	72560	33	0.05	1(0)
B2RC50	B2RC50_HUMAN cDNA, FLJ95853, highly similar to Homo sapiens exosome component Rrp46 (RRP46), mRNA OS=Homo sapiens PE=2 SV=1	25757	33	0.13	1(1)
B2RCX0	B2RCX0_HUMAN cDNA, FLJ96345, Homo sapiens SET translocation (myeloid leukemia-associated) (SET),mRNA OS=Homo sapiens PE=2 SV=1	32115	33	0.1	1(0)
B3KMG3	B3KMG3_HUMAN cDNA FLJ10929 fis, clone OVARC1000479, highly similar to Cullin-associated NEDD8-dissociated protein 1 OS=Homo sapiens PE=2 SV=1	51406	33	0.2	3(0)
B4DEE5	B4DEE5_HUMAN cDNA FLJ60230, highly similar to Arsenical pump-driving ATPase (EC 3.6.3.16) OS=Homo sapiens PE=2 SV=1	36162	33	0.09	1(0)
B4DNA0	B4DNA0_HUMAN cDNA FLJ58027 OS=Homo sapiens PE=2 SV=1	47806	33	0.07	1(0)
B4DNW3	B4DNW3_HUMAN cDNA FLJ51914, highly similar to Protein DEK OS=Homo sapiens PE=2 SV=1	40421	33	0.08	2(0)
B4DR16	B4DR16_HUMAN cDNA FLJ53084, highly similar to ADP-ribosylation factor-like protein 1 OS=Homo sapiens PE=2 SV=1	16885	33	0.2	1(1)
B5MCX3	B5MCX3_HUMAN Septin-2 OS=Homo sapiens GN=SEPT2 PE=2 SV=1	37145	33	0.19	2(1)
B7Z233	B7Z233_HUMAN Sterol O-acyltransferase 2 OS=Homo sapiens GN=ACAT2 PE=2 SV=1	45184	33	0.07	1(1)
B7Z3Q4	B7Z3Q4_HUMAN cDNA FLJ51873, highly similar to Alkyldihydroxyacetonephosphate synthase, peroxisomal (EC 2.5.1.26) OS=Homo sapiens PE=2 SV=1	64547	33	0.05	1(0)
E9PIE4	E9PIE4_HUMAN Mitochondrial carrier homolog 2 (Fragment) OS=Homo sapiens GN=MTCH2 PE=2 SV=1	29157	33	0.24	2(0)
F5GWU8	F5GWU8_HUMAN Ras-related protein Rap-1b (Fragment) OS=Homo sapiens GN=RAP1B PE=2 SV=1	9772	33	0.36	1(0)
F8WBL2	F8WBL2_HUMAN Bystin OS=Homo sapiens GN=BYSL PE=2 SV=1	21495	33	0.16	1(0)
H0Y3A0	H0Y3A0_HUMAN 60S ribosomal protein L35 (Fragment) OS=Homo sapiens GN=RPL35 PE=3 SV=1	10789	33	0.32	1(0)
H0YAL2	H0YAL2_HUMAN Pachytene checkpoint protein 2 homolog (Fragment) OS=Homo sapiens GN=TRIP13 PE=4 SV=1	28315	33	0.12	1(0)
H0YDK7	H0YDK7_HUMAN Ras-related protein Rab-30 (Fragment) OS=Homo sapiens GN=RAB30 PE=2 SV=1	19580	33	0.17	1(0)
J3KQ32	J3KQ32_HUMAN Obg-like ATPase 1 OS=Homo sapiens GN=OLA1 PE=4 SV=1	47136	33	0.14	2(0)
J3QSF4	J3QSF4_HUMAN Ras-related protein Rab-15 (Fragment) OS=Homo sapiens GN=RAB15 PE=4 SV=1	15796	33	0.22	1(0)
K7EIJ8	K7EIJ8_HUMAN Katanin p60 ATPase-containing subunit A-like 2 (Fragment) OS=Homo sapiens GN=KATNAL2 PE=4 SV=1	38325	33	0.09	1(0)
Q6FGY5	Q6FGY5_HUMAN CKAP1 protein OS=Homo sapiens GN=CKAP1 PE=2 SV=1	21959	33	0.15	1(0)
Q8N7G1	Q8N7G1_HUMAN Purine nucleoside phosphorylase OS=Homo sapiens PE=2 SV=1	32758	33	0.1	2(0)
Q9P258	RCC2_HUMAN Protein RCC2 OS=Homo sapiens GN=RCC2 PE=1 SV=2	56790	33	0.12	5(0)
A0PJJ5	A0PJJ5_HUMAN SRP72 protein (Fragment) OS=Homo sapiens GN=SRP72 PE=2 SV=1	63175	32	0.05	1(0)
A2VCL3	A2VCL3_HUMAN COG4 protein (Fragment) OS=Homo sapiens GN=COG4 PE=2 SV=1	50550	32	0.07	1(0)
B0AZM4	B0AZM4_HUMAN cDNA, FLJ79464, highly similar to Homo sapiens aquarius (Fragment) OS=Homo sapiens PE=2 SV=1	157764	32	0.02	1(0)
B2R8N0	B2R8N0_HUMAN cDNA, FLJ93975, highly similar to Homo sapiens epoxide hydrolase 1, microsomal (xenobiotic) (EPHX1), mRNA OS=Homo sapiens PE=2 SV=1	53129	32	0.06	4(0)
B3KRM8	B3KRM8_HUMAN Translin, isoform CRA_b OS=Homo sapiens GN=TSN PE=2 SV=1	21052	32	0.16	1(0)
B3KUY2	B3KUY2_HUMAN Prostaglandin E synthase 3 (Cytosolic), isoform CRA_c OS=Homo sapiens GN=PTGES3 PE=2 SV=1	19721	32	0.17	1(0)
B3KW21	B3KW21_HUMAN cDNA FLJ41945 fis, clone PLACE6019676, highly similar to Coatomer subunit gamma OS=Homo sapiens PE=2 SV=1	68674	32	0.1	2(0)
B4DKS0	B4DKS0_HUMAN cDNA FLJ53381, highly similar to Monocarboxylate transporter 1 OS=Homo sapiens PE=2 SV=1	52487	32	0.13	2(0)
B4DN87	B4DN87_HUMAN cDNA FLJ52569, highly similar to Collagen-binding protein 2 OS=Homo sapiens PE=2 SV=1	44290	32	0.24	3(0)
B4DVD7	B4DVD7_HUMAN Eukaryotic translation initiation factor 3 subunit K OS=Homo sapiens GN=EIF3K PE=2 SV=1	24771	32	0.14	1(0)
B4DX07	B4DX07_HUMAN cDNA FLJ54077, highly similar to 26S proteasome non-ATPase regulatory subunit 2 OS=Homo sapiens PE=2 SV=1	86277	32	0.04	1(1)
G3V1A4	G3V1A4_HUMAN Cofilin 1 (Non-muscle), isoform CRA_a OS=Homo sapiens GN=CFL1 PE=2 SV=1	17029	32	0.2	1(0)
H0Y8V7	H0Y8V7_HUMAN Protein transport protein Sec31A (Fragment) OS=Homo sapiens GN=SEC31A PE=2 SV=1	32306	32	0.1	1(0)
H0YN14	H0YN14_HUMAN Importin-4 OS=Homo sapiens GN=IPO4 PE=2 SV=1	103193	32	0.03	2(0)
H7C314	H7C314_HUMAN Src substrate cortactin (Fragment) OS=Homo sapiens GN=CTTN PE=4 SV=1	25136	32	0.13	1(0)
I3L163	I3L163_HUMAN Tubulin-specific chaperone D (Fragment) OS=Homo sapiens GN=TBCD PE=2 SV=1	27599	32	0.12	1(0)
J3KP58	J3KP58_HUMAN CAP-Gly domain-containing linker protein 1 OS=Homo sapiens GN=CLIP1 PE=4 SV=1	94314	32	0.03	1(0)
J3KTE4	J3KTE4_HUMAN Ribosomal protein L19 OS=Homo sapiens GN=RPL19 PE=3 SV=1	23347	32	0.14	2(0)
M0R0P7	M0R0P7_HUMAN 60S ribosomal protein L18a OS=Homo sapiens GN=RPL18A PE=4 SV=1	16338	32	0.46	2(0)
Q13098-6	CSN1_HUMAN Isoform 3 of COP9 signalosome complex subunit 1 OS=Homo sapiens GN=GPS1	60749	32	0.11	2(0)
Q1KMD3	HNRL2_HUMAN Heterogeneous nuclear ribonucleoprotein U-like protein 2 OS=Homo sapiens GN=HNRNPUL2 PE=1 SV=1	85622	32	0.04	1(0)
Q59FY4	Q59FY4_HUMAN Acetyl-CoA carboxylase 1 (Fragment) OS=Homo sapiens GN=ACACA PE=2 SV=1	115059	32	0.06	3(0)
Q7KZ85-2	SPT6H_HUMAN Isoform 2 of Transcription elongation factor SPT6 OS=Homo sapiens GN=SUPT6H	61605	32	0.05	1(0)
Q9H788	SH24A_HUMAN SH2 domain-containing protein 4A OS=Homo sapiens GN=SH2D4A PE=1 SV=1	52922	32	0.06	1(0)
Q9NR45	SIAS_HUMAN Sialic acid synthase OS=Homo sapiens GN=NANS PE=1 SV=2	40738	32	0.08	1(0)
B0V0F7	B0V0F7_HUMAN Putative pre-mRNA-splicing factor ATP-dependent RNA helicase DHX16 (Fragment) OS=Homo sapiens GN=DHX16 PE=2 SV=1	21454	31	0.16	1(0)
B0YIW5	B0YIW5_HUMAN Archain 1, isoform CRA_b OS=Homo sapiens GN=ARCN1 PE=2 SV=1	57630	31	0.06	1(0)
B2R7C5	B2R7C5_HUMAN cDNA, FLJ93378, highly similar to Homo sapiens MCM3 minichromosome maintenance deficient 3 (S. cerevisiae) (MCM3), mRNA OS=Homo sapiens PE=2 SV=1	91579	31	0.04	1(0)
B2RD79	B2RD79_HUMAN Ubiquitin carboxyl-terminal hydrolase OS=Homo sapiens PE=2 SV=1	56462	31	0.06	3(0)
B3KNB4	B3KNB4_HUMAN cDNA FLJ14168 fis, clone NT2RP2001440, highly similar to 14-3-3 protein gamma OS=Homo sapiens PE=2 SV=1	28453	31	0.12	2(0)
B3KQ71	B3KQ71_HUMAN cDNA FLJ32982 fis, clone THYMU1000002, highly similar to Golgi phosphoprotein 3 OS=Homo sapiens PE=2 SV=1	32320	31	0.1	1(0)
B4DWM5	B4DWM5_HUMAN cDNA FLJ61436, highly similar to Melanoma-associated antigen D2 OS=Homo sapiens PE=2 SV=1	26229	31	0.13	1(0)
B4E1C0	B4E1C0_HUMAN cDNA FLJ54225, moderately similar to Bifunctional coenzyme A synthase OS=Homo sapiens PE=2 SV=1	19140	31	0.18	1(0)
E5KLJ5	E5KLJ5_HUMAN Dynamin-like 120 kDa protein, mitochondrial OS=Homo sapiens GN=OPA1 PE=2 SV=1	118240	31	0.06	2(0)
F8VR84	F8VR84_HUMAN UPF0160 protein MYG1, mitochondrial OS=Homo sapiens GN=C12orf10 PE=2 SV=1	24214	31	0.14	1(0)
F8VS35	F8VS35_HUMAN 2~-5~-oligoadenylate synthase 3 OS=Homo sapiens GN=OAS3 PE=2 SV=1	24814	31	0.13	2(1)
H0Y9D8	H0Y9D8_HUMAN Inorganic pyrophosphatase 2, mitochondrial (Fragment) OS=Homo sapiens GN=PPA2 PE=4 SV=1	25904	31	0.27	2(0)
H0YNE3	H0YNE3_HUMAN Proteasome activator complex subunit 1 OS=Homo sapiens GN=PSME1 PE=2 SV=1	27081	31	0.12	1(0)
H7C333	H7C333_HUMAN Protein NipSnap homolog 2 (Fragment) OS=Homo sapiens GN=GBAS PE=4 SV=1	13826	31	0.25	1(0)
L0R4T3	L0R4T3_HUMAN Histone H2B OS=Homo sapiens GN=ABCF2 PE=3 SV=1	7359	31	0.48	2(1)
M0QX71	M0QX71_HUMAN Glutamate-rich WD repeat-containing protein 1 (Fragment) OS=Homo sapiens GN=GRWD1 PE=4 SV=1	25632	31	0.13	2(0)
M0R0K9	M0R0K9_HUMAN Transcription intermediary factor 1-beta (Fragment) OS=Homo sapiens GN=TRIM28 PE=4 SV=1	49031	31	0.07	4(0)
Q09666	AHNK_HUMAN Neuroblast differentiation-associated protein AHNAK OS=Homo sapiens GN=AHNAK PE=1 SV=2	629213	31	0.02	3(0)
Q1L838	Q1L838_HUMAN GTBP-ALT OS=Homo sapiens GN=GTBP PE=3 SV=1	122267	31	0.05	2(0)
Q4KMR3	Q4KMR3_HUMAN MYO1E variant protein OS=Homo sapiens GN=MYO1E PE=2 SV=1	127552	31	0.08	3(0)
Q4LE79	Q4LE79_HUMAN DSP variant protein (Fragment) OS=Homo sapiens GN=DSP variant protein PE=2 SV=1	267367	31	0.04	4(0)
Q5T5E6	Q5T5E6_HUMAN Potassium channel subfamily K member 1 (Fragment) OS=Homo sapiens GN=KCNK1 PE=2 SV=1	27799	31	0.12	1(1)
Q6IB76	Q6IB76_HUMAN NDUFV2 protein OS=Homo sapiens GN=NDUFV2 PE=2 SV=1	27617	31	0.12	1(1)
Q8IVT2	MISP_HUMAN Mitotic interactor and substrate of PLK1 OS=Homo sapiens GN=MISP PE=1 SV=1	75482	31	0.04	1(0)
Q9UN73	PCDA6_HUMAN Protocadherin alpha-6 OS=Homo sapiens GN=PCDHA6 PE=2 SV=1	103336	31	0.03	1(1)
A6NKX1	F223B_HUMAN Protein FAM223B OS=Homo sapiens GN=FAM223B PE=3 SV=1	13997	30	0.25	1(0)
B0QYA5	B0QYA5_HUMAN Eukaryotic translation initiation factor 3 subunit D (Fragment) OS=Homo sapiens GN=EIF3D PE=2 SV=1	31937	30	0.1	2(0)
B1AKP7	B1AKP7_HUMAN TAR DNA-binding protein 43 OS=Homo sapiens GN=TARDBP PE=2 SV=1	33783	30	0.1	1(0)
B1AR80	B1AR80_HUMAN UDP-N-acetylhexosamine pyrophosphorylase (Fragment) OS=Homo sapiens GN=UAP1 PE=2 SV=1	25341	30	0.13	1(0)
B2R694	B2R694_HUMAN cDNA, FLJ92849, highly similar to Homo sapiens lanosterol synthase (2,3-oxidosqualene-lanosterol cyclase) (LSS), mRNA OS=Homo sapiens PE=2 SV=1	84568	30	0.04	1(0)
B2RD40	B2RD40_HUMAN cDNA, FLJ96442, highly similar to Homo sapiens copine II (CPNE2), mRNA OS=Homo sapiens PE=2 SV=1	60430	30	0.05	1(0)
B3KM86	B3KM86_HUMAN cDNA FLJ10524 fis, clone NT2RP2000880, highly similar to Eukaryotic translation initiation factor 5B OS=Homo sapiens PE=2 SV=1	71847	30	0.05	1(0)
B4DF00	B4DF00_HUMAN cDNA FLJ53308, highly similar to 2-oxoglutarate dehydrogenase E1 component, mitochondrial (EC 1.2.4.2) OS=Homo sapiens PE=2 SV=1	111596	30	0.03	1(1)
B4DJP7	B4DJP7_HUMAN Small nuclear ribonucleoprotein Sm D3 OS=Homo sapiens GN=SNRPD3 PE=2 SV=1	13454	30	0.25	1(0)
B4DRT4	B4DRT4_HUMAN cDNA FLJ51535, highly similar to Phosphatidylethanolamine-binding protein 1 OS=Homo sapiens PE=2 SV=1	17543	30	0.19	1(0)
B7Z438	B7Z438_HUMAN cDNA FLJ56352, highly similar to Succinyl-CoA ligase (GDP-forming) subunit alpha, mitochondrial (EC 6.2.1.4) OS=Homo sapiens PE=2 SV=1	26801	30	0.26	2(0)
C9JZR2	C9JZR2_HUMAN Catenin delta-1 OS=Homo sapiens GN=CTNND1 PE=2 SV=2	105354	30	0.03	1(0)
D3DUJ0	D3DUJ0_HUMAN AFG3 ATPase family gene 3-like 2 (Yeast), isoform CRA_a (Fragment) OS=Homo sapiens GN=AFG3L2 PE=2 SV=1	84677	30	0.08	2(0)
E5KN55	E5KN55_HUMAN Peptidyl-prolyl cis-trans isomerase D OS=Homo sapiens PE=2 SV=1	41137	30	0.08	1(0)
J3QT28	J3QT28_HUMAN Mitotic checkpoint protein BUB3 (Fragment) OS=Homo sapiens GN=BUB3 PE=4 SV=1	32083	30	0.1	1(0)
P46063	RECQ1_HUMAN ATP-dependent DNA helicase Q1 OS=Homo sapiens GN=RECQL PE=1 SV=3	74436	30	0.04	1(0)
P62269	RS18_HUMAN 40S ribosomal protein S18 OS=Homo sapiens GN=RPS18 PE=1 SV=3	17708	30	0.19	1(0)
Q08188	TGM3_HUMAN Protein-glutamine gamma-glutamyltransferase E OS=Homo sapiens GN=TGM3 PE=1 SV=4	76926	30	0.04	1(0)
Q6IPN0	Q6IPN0_HUMAN RTN4 protein OS=Homo sapiens GN=RTN4 PE=2 SV=1	36952	30	0.09	1(0)
Q6ZVX7	FBX50_HUMAN F-box only protein 50 OS=Homo sapiens GN=NCCRP1 PE=1 SV=1	30942	30	0.11	1(0)
Q9UKD2	MRT4_HUMAN mRNA turnover protein 4 homolog OS=Homo sapiens GN=MRTO4 PE=1 SV=2	27657	30	0.12	1(0)
Q9Y613	FHOD1_HUMAN FH1/FH2 domain-containing protein 1 OS=Homo sapiens GN=FHOD1 PE=1 SV=3	127328	30	0.03	1(0)
A6NFX8	A6NFX8_HUMAN ADP-sugar pyrophosphatase OS=Homo sapiens GN=NUDT5 PE=2 SV=1	26164	29	0.13	1(0)
B4DGX3	B4DGX3_HUMAN Phosphoribosylaminoimidazole-succinocarboxamide synthase OS=Homo sapiens PE=2 SV=1	31934	29	0.1	3(0)
B4DN49	B4DN49_HUMAN cDNA FLJ50998, highly similar to DNA mismatch repair protein Msh2 OS=Homo sapiens PE=2 SV=1	97491	29	0.03	1(0)
B4DRS4	B4DRS4_HUMAN cDNA FLJ60139, highly similar to Homo sapiens HIV TAT specific factor 1 (HTATSF1), mRNA OS=Homo sapiens PE=2 SV=1	82542	29	0.04	1(0)
D2CFK9	D2CFK9_HUMAN Nucleolar GTP-binding protein 1 OS=Homo sapiens GN=GTPBP4 PE=2 SV=1	74317	29	0.04	1(0)
D3DWL9	D3DWL9_HUMAN Cleavage and polyadenylation specific factor 1, 160kDa, isoform CRA_a OS=Homo sapiens GN=CPSF1 PE=2 SV=1	153087	29	0.02	1(0)
F1T0B3	F1T0B3_HUMAN ATP-dependent RNA helicase DDX1 OS=Homo sapiens GN=DDX1 PE=2 SV=1	74838	29	0.04	1(0)
F5H1Y3	F5H1Y3_HUMAN Flap endonuclease 1 (Fragment) OS=Homo sapiens GN=FEN1 PE=2 SV=1	18377	29	0.18	1(0)
H0Y449	H0Y449_HUMAN Nuclease-sensitive element-binding protein 1 (Fragment) OS=Homo sapiens GN=YBX1 PE=4 SV=1	42333	29	0.08	1(0)
H0Y815	H0Y815_HUMAN THO complex subunit 2 (Fragment) OS=Homo sapiens GN=THOC2 PE=4 SV=1	43876	29	0.08	1(0)
H0YCG1	H0YCG1_HUMAN Splicing factor 3B subunit 2 (Fragment) OS=Homo sapiens GN=SF3B2 PE=2 SV=1	42431	29	0.08	2(0)
H0YCP8	H0YCP8_HUMAN Poly(U)-binding-splicing factor PUF60 (Fragment) OS=Homo sapiens GN=PUF60 PE=4 SV=1	28260	29	0.12	1(0)
H0YJ95	H0YJ95_HUMAN Y+L amino acid transporter 1 (Fragment) OS=Homo sapiens GN=SLC7A7 PE=4 SV=1	18744	29	0.18	1(0)
H3BNV2	H3BNV2_HUMAN NAD(P)H dehydrogenase [quinone] 1 OS=Homo sapiens GN=NQO1 PE=2 SV=1	28533	29	0.12	1(0)
H7C3T4	H7C3T4_HUMAN Peroxiredoxin-4 (Fragment) OS=Homo sapiens GN=PRDX4 PE=4 SV=1	18485	29	0.18	1(0)
M0R019	M0R019_HUMAN Heterogeneous nuclear ribonucleoprotein M (Fragment) OS=Homo sapiens GN=HNRNPM PE=4 SV=1	37717	29	0.09	1(0)
P15170-2	ERF3A_HUMAN Isoform 2 of Eukaryotic peptide chain release factor GTP-binding subunit ERF3A OS=Homo sapiens GN=GSPT1	69355	29	0.05	1(0)
Q4VXZ8	Q4VXZ8_HUMAN Peroxisomal 2,4-dienoyl-CoA reductase OS=Homo sapiens GN=DECR2 PE=2 SV=1	29807	29	0.11	1(0)
Q548W1	Q548W1_HUMAN HRNT1 OS=Homo sapiens GN=OGT PE=2 SV=1	104029	29	0.03	1(0)
Q59GV2	Q59GV2_HUMAN RNA binding motif protein 14 variant (Fragment) OS=Homo sapiens PE=2 SV=1	55824	29	0.06	4(0)
Q8TEM1	PO210_HUMAN Nuclear pore membrane glycoprotein 210 OS=Homo sapiens GN=NUP210 PE=1 SV=3	205895	29	0.02	2(0)
Q96P70	IPO9_HUMAN Importin-9 OS=Homo sapiens GN=IPO9 PE=1 SV=3	116858	29	0.03	1(0)
Q9NZ23	Q9NZ23_HUMAN Drug-sensitive protein 1 OS=Homo sapiens GN=YA61 PE=2 SV=1	14858	29	0.23	1(0)
B2R6D0	B2R6D0_HUMAN cDNA, FLJ92896, highly similar to Homo sapiens proteasome (prosome, macropain) 26S subunit, non-ATPase, 1 (PSMD1), mRNA OS=Homo sapiens PE=2 SV=1	106797	28	0.03	1(0)
B2R959	B2R959_HUMAN cDNA, FLJ94229, highly similar to Homo sapiens heterogeneous nuclear ribonucleoprotein L (HNRPL),mRNA OS=Homo sapiens PE=2 SV=1	60838	28	0.05	4(0)
B2R9S4	B2R9S4_HUMAN cDNA, FLJ94534, highly similar to Homo sapiens capping protein (actin filament), gelsolin-like(CAPG), mRNA OS=Homo sapiens PE=2 SV=1	38759	28	0.09	1(0)
B2RBE0	B2RBE0_HUMAN cDNA, FLJ95462, highly similar to Homo sapiens fatty-acid-Coenzyme A ligase, long-chain 3 (FACL3),mRNA OS=Homo sapiens PE=2 SV=1	81266	28	0.04	2(0)
B2RCA8	B2RCA8_HUMAN cDNA, FLJ95945 OS=Homo sapiens PE=2 SV=1	56822	28	0.06	1(1)
B4DFU8	B4DFU8_HUMAN cDNA FLJ54647, highly similar to Liprin-beta-1 (Fragment) OS=Homo sapiens PE=2 SV=1	84347	28	0.04	1(0)
B4E3M6	B4E3M6_HUMAN cDNA FLJ55446, highly similar to Superkiller viralicidic activity 2-like 2 (EC 3.6.1.-) OS=Homo sapiens PE=2 SV=1	107714	28	0.03	1(0)
B5ME97	B5ME97_HUMAN Septin 10, isoform CRA_c OS=Homo sapiens GN=SEPT10 PE=2 SV=2	63703	28	0.05	1(0)
C9J1E1	C9J1E1_HUMAN Biliverdin reductase A (Fragment) OS=Homo sapiens GN=BLVRA PE=2 SV=1	11343	28	0.3	1(0)
D3DX73	D3DX73_HUMAN HCG1994636, isoform CRA_b OS=Homo sapiens GN=hCG_1994636 PE=4 SV=1	102552	28	0.03	1(0)
E5RI99	E5RI99_HUMAN 60S ribosomal protein L30 (Fragment) OS=Homo sapiens GN=RPL30 PE=2 SV=1	12819	28	0.27	1(0)
E9PQK6	E9PQK6_HUMAN Apoptosis inhibitor 5 OS=Homo sapiens GN=API5 PE=2 SV=1	13889	28	0.25	1(0)
H0Y6J8	H0Y6J8_HUMAN MICAL-like protein 1 (Fragment) OS=Homo sapiens GN=MICALL1 PE=4 SV=1	40261	28	0.08	1(0)
H0YIC4	H0YIC4_HUMAN Citrate synthase (Fragment) OS=Homo sapiens GN=CS PE=2 SV=1	14171	28	0.24	1(0)
H7C5Q2	H7C5Q2_HUMAN Acyl-coenzyme A thioesterase 9, mitochondrial (Fragment) OS=Homo sapiens GN=ACOT9 PE=2 SV=1	30256	28	0.11	1(0)
I3L2C7	I3L2C7_HUMAN Gem-associated protein 4 OS=Homo sapiens GN=GEMIN4 PE=2 SV=1	120456	28	0.03	1(0)
M0QX76	M0QX76_HUMAN 40S ribosomal protein S16 (Fragment) OS=Homo sapiens GN=RPS16 PE=3 SV=1	5611	28	1.69	2(0)
M0QZS6	M0QZS6_HUMAN SUMO-activating enzyme subunit 1 OS=Homo sapiens GN=SAE1 PE=4 SV=1	29632	28	0.11	1(0)
O14746	TERT_HUMAN Telomerase reverse transcriptase OS=Homo sapiens GN=TERT PE=1 SV=1	128570	28	0.03	1(0)
Q2M3G4	SHRM1_HUMAN Protein Shroom1 OS=Homo sapiens GN=SHROOM1 PE=1 SV=1	91528	28	0.04	1(0)
Q6IBU0	Q6IBU0_HUMAN EIF5 protein OS=Homo sapiens GN=EIF5 PE=2 SV=1	49577	28	0.07	1(0)
Q6PK82	Q6PK82_HUMAN AP3D1 protein (Fragment) OS=Homo sapiens GN=AP3D1 PE=2 SV=1	99103	28	0.07	2(0)
Q8IV97	Q8IV97_HUMAN Solute carrier family 7 (Cationic amino acid transporter, y+ system), member 5 OS=Homo sapiens GN=SLC7A5 PE=2 SV=1	55643	28	0.06	4(0)
A5YM44	A5YM44_HUMAN APAF1 protein OS=Homo sapiens GN=APAF1 PE=2 SV=1	139198	27	0.02	1(0)
B2RB52	B2RB52_HUMAN cDNA, FLJ95314, highly similar to Homo sapiens transducin (beta)-like 2 (TBL2), transcript variant 1, mRNA OS=Homo sapiens PE=2 SV=1	50423	27	0.07	1(0)
B3KNH5	B3KNH5_HUMAN cDNA FLJ14622 fis, clone NT2RP2000147, highly similar to Adaptor-related protein complex 1 mu-1 subunit OS=Homo sapiens PE=2 SV=1	48701	27	0.07	2(0)
B3KNH6	B3KNH6_HUMAN cDNA FLJ14631 fis, clone NT2RP2000660, highly similar to Homo sapiens fidgetin-like 1 (FIGNL1), mRNA OS=Homo sapiens PE=2 SV=1	74799	27	0.04	2(0)
B3KQH1	B3KQH1_HUMAN cDNA FLJ90452 fis, clone NT2RP3001475, highly similar to Splicing factor 3B subunit 3 OS=Homo sapiens PE=2 SV=1	100657	27	0.03	1(0)
B3KQH4	B3KQH4_HUMAN cDNA FLJ90464 fis, clone NT2RP3002281, highly similar to RNA-binding protein 12 OS=Homo sapiens PE=2 SV=1	59339	27	0.06	1(0)
B3KV49	B3KV49_HUMAN cDNA FLJ16128 fis, clone BRACE2038269, moderately similar to Bombyx mori cytosolic juvenile hormone binding protein 36 kDa subunit (cJHBP) mRNA OS=Homo sapiens PE=2 SV=1	26937	27	0.12	2(0)
B4DIW2	B4DIW2_HUMAN cDNA FLJ54035, highly similar to Neutral alpha-glucosidase AB OS=Homo sapiens PE=2 SV=1	94218	27	0.03	1(0)
B4DJU4	B4DJU4_HUMAN cDNA FLJ53344, highly similar to Splicing factor 1 OS=Homo sapiens PE=2 SV=1	67535	27	0.05	1(0)
F2Z3C0	F2Z3C0_HUMAN 40S ribosomal protein S9 OS=Homo sapiens GN=RPS9 PE=2 SV=1	9255	27	0.38	1(0)
G3V1V0	G3V1V0_HUMAN Myosin light polypeptide 6 OS=Homo sapiens GN=MYL6 PE=2 SV=1	18311	27	0.18	1(0)
G5E977	G5E977_HUMAN Nicotinate phosphoribosyltransferase (Fragment) OS=Homo sapiens GN=NAPRT1 PE=2 SV=1	62817	27	0.05	1(0)
H0YCQ8	H0YCQ8_HUMAN Eukaryotic translation initiation factor 3 subunit M (Fragment) OS=Homo sapiens GN=EIF3M PE=2 SV=1	25474	27	0.13	1(0)
H0YJF9	H0YJF9_HUMAN Dihydrolipoyllysine-residue succinyltransferase component of 2-oxoglutarate dehydrogenase complex, mitochondrial (Fragment) OS=Homo sapiens GN=DLST PE=4 SV=1	8710	27	0.43	1(0)
H7BXY3	H7BXY3_HUMAN Putative ATP-dependent RNA helicase DHX30 OS=Homo sapiens GN=DHX30 PE=2 SV=1	131495	27	0.02	1(0)
H7BY10	H7BY10_HUMAN 60S ribosomal protein L23a (Fragment) OS=Homo sapiens GN=RPL23A PE=3 SV=1	17849	27	0.19	1(0)
I3L0U2	I3L0U2_HUMAN Testisin (Fragment) OS=Homo sapiens GN=PRSS21 PE=3 SV=1	25258	27	0.14	1(1)
O00151	PDLI1_HUMAN PDZ and LIM domain protein 1 OS=Homo sapiens GN=PDLIM1 PE=1 SV=4	36505	27	0.09	1(0)
P01031	CO5_HUMAN Complement C5 OS=Homo sapiens GN=C5 PE=1 SV=4	189897	27	0.02	1(0)
P05109	S10A8_HUMAN Protein S100-A8 OS=Homo sapiens GN=S100A8 PE=1 SV=1	10885	27	0.32	1(0)
P45974	UBP5_HUMAN Ubiquitin carboxyl-terminal hydrolase 5 OS=Homo sapiens GN=USP5 PE=1 SV=2	96638	27	0.03	1(0)
P62195	PRS8_HUMAN 26S protease regulatory subunit 8 OS=Homo sapiens GN=PSMC5 PE=1 SV=1	45768	27	0.07	1(0)
Q14432	PDE3A_HUMAN cGMP-inhibited 3~,5~-cyclic phosphodiesterase A OS=Homo sapiens GN=PDE3A PE=1 SV=3	126440	27	0.03	1(0)
Q14730	Q14730_HUMAN La 4.1 protein (Fragment) OS=Homo sapiens PE=2 SV=1	33852	27	0.1	1(0)
Q5VZU9	Q5VZU9_HUMAN Tripeptidyl-peptidase 2 OS=Homo sapiens GN=TPP2 PE=2 SV=1	141160	27	0.02	1(0)
Q6IAM0	Q6IAM0_HUMAN Eukaryotic translation initiation factor 3 subunit G OS=Homo sapiens GN=EIF3S4 PE=2 SV=1	35864	27	0.09	1(0)
Q6NVW7	Q6NVW7_HUMAN Importin subunit alpha OS=Homo sapiens GN=KPNA2 PE=2 SV=1	58271	27	0.18	4(0)
Q7KYM9	Q7KYM9_HUMAN ORF protein OS=Homo sapiens GN=ORF PE=2 SV=1	60153	27	0.11	4(0)
Q8IXH2	Q8IXH2_HUMAN MSTP057 OS=Homo sapiens PE=2 SV=1	30034	27	0.11
Q8N766	EMC1_HUMAN ER membrane protein complex subunit 1 OS=Homo sapiens GN=EMC1 PE=1 SV=1	112145	27	0.03	1(0)
Q9UKN7	MYO15_HUMAN Unconventional myosin-XV OS=Homo sapiens GN=MYO15A PE=1 SV=2	397610	27	0.01	2(0)
Q9ULR0	ISY1_HUMAN Pre-mRNA-splicing factor ISY1 homolog OS=Homo sapiens GN=ISY1 PE=1 SV=3	33029	27	0.1	1(0)
B2RCM3	B2RCM3_HUMAN cDNA, FLJ96158, highly similar to Homo sapiens calpain 2, (m/II) large subunit (CAPN2), mRNA OS=Homo sapiens PE=2 SV=1	80883	26	0.04	1(0)
B2RD24	B2RD24_HUMAN cDNA, FLJ96424 OS=Homo sapiens PE=2 SV=1	80216	26	0.04	1(0)
B3KUP9	B3KUP9_HUMAN cDNA FLJ40361 fis, clone TESTI2034407, highly similar to NEDD8-activating enzyme E1 regulatory subunit OS=Homo sapiens PE=2 SV=1	60951	26	0.05	1(0)
B4DET1	B4DET1_HUMAN cDNA FLJ53860, highly similar to DNA-directed RNA polymerase II largest subunit (EC 2.7.7.6) OS=Homo sapiens PE=2 SV=1	92209	26	0.03	1(0)
B4DKM5	B4DKM5_HUMAN Voltage-dependent anion-selective channel protein 2 OS=Homo sapiens GN=VDAC2 PE=2 SV=1	27804	26	0.12	2(0)
B4DKR1	B4DKR1_HUMAN cDNA FLJ51884, highly similar to Mitochondrial inner membrane protein OS=Homo sapiens PE=2 SV=1	82864	26	0.04	1(0)
B4E0N6	B4E0N6_HUMAN cDNA FLJ56280, highly similar to Endoplasmic reticulum-Golgi intermediate compartment protein 1 OS=Homo sapiens PE=2 SV=1	26584	26	0.13	1(0)
B7Z5C1	B7Z5C1_HUMAN cDNA FLJ56126, highly similar to Programmed cell death 6-interacting protein OS=Homo sapiens PE=2 SV=1	72117	26	0.05	2(0)
E7ES28	E7ES28_HUMAN Solute carrier family 40 member 1 (Fragment) OS=Homo sapiens GN=SLC40A1 PE=2 SV=1	22126	26	0.15	1(0)
E9PPH5	E9PPH5_HUMAN Acidic leucine-rich nuclear phosphoprotein 32 family member E (Fragment) OS=Homo sapiens GN=ANP32E PE=2 SV=1	13234	26	0.26	6(0)
F5GXG4	F5GXG4_HUMAN Serine/threonine-protein phosphatase PGAM5, mitochondrial OS=Homo sapiens GN=PGAM5 PE=2 SV=1	16072	26	0.21	1(0)
H0YGF3	H0YGF3_HUMAN Pre-mRNA-processing factor 19 (Fragment) OS=Homo sapiens GN=PRPF19 PE=2 SV=1	5307	26	0.68	1(0)
H0YI52	H0YI52_HUMAN Probable ATP-dependent RNA helicase DDX23 (Fragment) OS=Homo sapiens GN=DDX23 PE=4 SV=1	16691	26	0.2	1(0)
H3BTA2	H3BTA2_HUMAN Serine/threonine-protein phosphatase (Fragment) OS=Homo sapiens GN=PPP4C PE=2 SV=1	31112	26	0.11	1(0)
H9ZYJ2	H9ZYJ2_HUMAN Thioredoxin OS=Homo sapiens GN=TXN PE=2 SV=1	12015	26	0.29	1(0)
J3QSB5	J3QSB5_HUMAN 60S ribosomal protein L36 OS=Homo sapiens GN=RPL36 PE=3 SV=1	10896	26	0.32	1(0)
P62277	RS13_HUMAN 40S ribosomal protein S13 OS=Homo sapiens GN=RPS13 PE=1 SV=2	17212	26	0.43	3(0)
Q0ZAJ1	Q0ZAJ1_HUMAN MSH2-Ex5 isoform (Fragment) OS=Homo sapiens GN=MSH2 PE=2 SV=1	11803	26	0.29	4(0)
Q3B7A7	Q3B7A7_HUMAN Phosphoribosylglycinamide formyltransferase, phosphoribosylglycinamide synthetase, phosphoribosylaminoimidazole synthetase OS=Homo sapiens GN=GART PE=2 SV=1	108909	26	0.03	2(0)
Q5RLJ0	Q5RLJ0_HUMAN CLE OS=Homo sapiens PE=2 SV=1	28066	26	0.12	1(0)
Q5T8A0	Q5T8A0_HUMAN 28S ribosomal protein S2, mitochondrial (Fragment) OS=Homo sapiens GN=MRPS2 PE=2 SV=1	30745	26	0.11	1(0)
Q5U025	Q5U025_HUMAN ADP-ribosylation factor 6 OS=Homo sapiens PE=2 SV=1	20313	26	0.17	1(0)
Q86Y75	Q86Y75_HUMAN UPP1 protein OS=Homo sapiens GN=UPP1 PE=2 SV=1	19620	26	0.17	1(0)
Q8IYI6	EXOC8_HUMAN Exocyst complex component 8 OS=Homo sapiens GN=EXOC8 PE=1 SV=2	82432	26	0.04	3(0)
Q9H3U1	UN45A_HUMAN Protein unc-45 homolog A OS=Homo sapiens GN=UNC45A PE=1 SV=1	104266	26	0.03	1(0)
Q9NZB2	F120A_HUMAN Constitutive coactivator of PPAR-gamma-like protein 1 OS=Homo sapiens GN=FAM120A PE=1 SV=2	123008	26	0.03	2(0)
B3KU62	B3KU62_HUMAN cDNA FLJ39243 fis, clone OCBBF2008283, highly similar to Protein NDRG1 OS=Homo sapiens PE=2 SV=1	38948	25	0.08	1(0)
B3KVX6	B3KVX6_HUMAN cDNA FLJ41699 fis, clone HCHON2004776, highly similar to Homo sapiens cytoskeleton-associated protein 4 (CKAP4), mRNA OS=Homo sapiens PE=2 SV=1	58173	25	0.06	1(0)
B4DJ81	B4DJ81_HUMAN NADH-ubiquinone oxidoreductase 75 kDa subunit, mitochondrial OS=Homo sapiens GN=NDUFS1 PE=2 SV=1	67563	25	0.05	1(0)
B4DUP2	B4DUP2_HUMAN cDNA FLJ56155, highly similar to UTP--glucose-1-phosphate uridylyltransferase 2 (EC 2.7.7.9) OS=Homo sapiens PE=2 SV=1	57926	25	0.06	2(0)
B7Z8J4	B7Z8J4_HUMAN Glycylpeptide N-tetradecanoyltransferase 1 OS=Homo sapiens GN=NMT1 PE=2 SV=1	15265	25	0.22	1(0)
B7Z8Y3	B7Z8Y3_HUMAN cDNA FLJ61696, highly similar to Double-stranded RNA-specific adenosine deaminase (EC 3.5.4.-) OS=Homo sapiens PE=2 SV=1	107861	25	0.06	2(0)
D3DS02	D3DS02_HUMAN HCG2044783, isoform CRA_a OS=Homo sapiens GN=hCG_2044783 PE=4 SV=1	21337	25	0.16	1(1)
E5KN95	E5KN95_HUMAN APEX nuclease (Apurinic/apyrimidinic endonuclease) 2, isoform CRA_b OS=Homo sapiens GN=APEX2 PE=2 SV=1	58390	25	0.06	1(0)
E9PCX2	E9PCX2_HUMAN Aldose reductase OS=Homo sapiens GN=AKR1B1 PE=2 SV=1	29768	25	0.11	1(0)
G3V1J5	G3V1J5_HUMAN Exosome complex exonuclease RRP44 OS=Homo sapiens GN=DIS3 PE=2 SV=1	91382	25	0.04	2(0)
H0Y8R1	H0Y8R1_HUMAN G-rich sequence factor 1 (Fragment) OS=Homo sapiens GN=GRSF1 PE=4 SV=1	47637	25	0.07	1(0)
H0YL71	H0YL71_HUMAN Mothers against decapentaplegic homolog 3 (Fragment) OS=Homo sapiens GN=SMAD3 PE=2 SV=1	10544	25	0.33	1(0)
H3BNX8	H3BNX8_HUMAN Cytochrome c oxidase subunit 5A, mitochondrial OS=Homo sapiens GN=COX5A PE=2 SV=1	17452	25	0.19	1(0)
P54886	P5CS_HUMAN Delta-1-pyrroline-5-carboxylate synthase OS=Homo sapiens GN=ALDH18A1 PE=1 SV=2	87989	25	0.04	1(0)
Q53TH1	Q53TH1_HUMAN Putative uncharacterized protein PSMD14 (Fragment) OS=Homo sapiens GN=PSMD14 PE=2 SV=1	18165	25	0.2	1(0)
Q59HE2	Q59HE2_HUMAN Ornithine aminotransferase variant (Fragment) OS=Homo sapiens PE=2 SV=1	31002	25	0.11	1(0)
Q5HYM2	Q5HYM2_HUMAN Putative uncharacterized protein DKFZp686O2462 (Fragment) OS=Homo sapiens GN=DKFZp686O2462 PE=4 SV=1	72627	25	0.05	2(0)
Q7Z5H4	VN1R5_HUMAN Vomeronasal type-1 receptor 5 OS=Homo sapiens GN=VN1R5 PE=2 SV=2	41265	25	0.08	1(0)
Q8N8J7	CD032_HUMAN Uncharacterized protein C4orf32 OS=Homo sapiens GN=C4orf32 PE=2 SV=2	14757	25	0.23	1(0)
Q8WUY1	THEM6_HUMAN Protein THEM6 OS=Homo sapiens GN=THEM6 PE=1 SV=2	24135	25	0.14	1(0)
Q92621	NU205_HUMAN Nuclear pore complex protein Nup205 OS=Homo sapiens GN=NUP205 PE=1 SV=3	230171	25	0.03	2(0)
B2R774	B2R774_HUMAN cDNA, FLJ93313, highly similar to Homo sapiens lectin, mannose-binding, 1 (LMAN1), mRNA OS=Homo sapiens PE=2 SV=1	57768	24	0.06	1(0)
B3KM48	B3KM48_HUMAN cDNA FLJ10286 fis, clone HEMBB1001384, highly similar to COP9 signalosome complex subunit 4 OS=Homo sapiens PE=2 SV=1	46511	24	0.07	1(0)
B3KM74	B3KM74_HUMAN cDNA FLJ10425 fis, clone NT2RP1000326, highly similar to Metaxin-2 OS=Homo sapiens PE=2 SV=1	29956	24	0.11	1(0)
B3KNE8	B3KNE8_HUMAN cDNA FLJ14470 fis, clone MAMMA1001008, highly similar to Beta-secretase 2 OS=Homo sapiens PE=2 SV=1	39583	24	0.17	2(0)
B4DP50	B4DP50_HUMAN cDNA FLJ58269, highly similar to Bifunctional aminoacyl-tRNA synthetase OS=Homo sapiens PE=2 SV=1	54850	24	0.06	1(0)
B4DSN5	B4DSN5_HUMAN Tyrosine-protein phosphatase non-receptor type OS=Homo sapiens GN=PTPN1 PE=2 SV=1	41747	24	0.08	1(0)
B4DWB5	B4DWB5_HUMAN cDNA FLJ53931, highly similar to Bifunctional 3~-phosphoadenosine5~-phosphosulfate synthetase 2 OS=Homo sapiens PE=2 SV=1	70558	24	0.1	2(0)
B8ZZ81	B8ZZ81_HUMAN Alkyldihydroxyacetonephosphate synthase, peroxisomal OS=Homo sapiens GN=AGPS PE=2 SV=1	20259	24	0.36	2(0)
C9JD37	C9JD37_HUMAN Growth factor receptor-bound protein 14 (Fragment) OS=Homo sapiens GN=GRB14 PE=2 SV=2	48009	24	0.07	1(0)
F8WB72	F8WB72_HUMAN 60S ribosomal protein L35a OS=Homo sapiens GN=RPL35A PE=2 SV=1	6813	24	0.53	1(0)
H0YDD4	H0YDD4_HUMAN Dihydrolipoyllysine-residue acetyltransferase component of pyruvate dehydrogenase complex, mitochondrial (Fragment) OS=Homo sapiens GN=DLAT PE=2 SV=1	51511	24	0.06	1(0)
H0YE81	H0YE81_HUMAN NADH dehydrogenase [ubiquinone] flavoprotein 1, mitochondrial (Fragment) OS=Homo sapiens GN=NDUFV1 PE=2 SV=1	14494	24	0.23	1(0)
H0YGU3	H0YGU3_HUMAN All-trans-retinol 13,14-reductase (Fragment) OS=Homo sapiens GN=RETSAT PE=4 SV=1	15136	24	0.23	1(0)
H0YGW7	H0YGW7_HUMAN ATP-binding cassette sub-family F member 1 (Fragment) OS=Homo sapiens GN=ABCF1 PE=3 SV=1	68075	24	0.05	1(0)
I3L204	I3L204_HUMAN Unconventional myosin-Ic (Fragment) OS=Homo sapiens GN=MYO1C PE=2 SV=1	34968	24	0.09	1(0)
M0QXL5	M0QXL5_HUMAN rRNA 2~-O-methyltransferase fibrillarin (Fragment) OS=Homo sapiens GN=FBL PE=3 SV=1	26737	24	0.12	1(0)
P17812	PYRG1_HUMAN CTP synthase 1 OS=Homo sapiens GN=CTPS1 PE=1 SV=2	67332	24	0.05	2(0)
Q0QF12	Q0QF12_HUMAN Succinate dehydrogenase complex subunit A (Fragment) OS=Homo sapiens GN=SDHA PE=2 SV=1	60982	24	0.05	1(0)
Q13907	IDI1_HUMAN Isopentenyl-diphosphate Delta-isomerase 1 OS=Homo sapiens GN=IDI1 PE=1 SV=2	26645	24	0.13	2(0)
Q2XPP3	Q2XPP3_HUMAN Type II 3a-hydroxysteroid dehydrogenase variant OS=Homo sapiens PE=2 SV=1	37201	24	0.09	1(0)
Q3KQZ2	Q3KQZ2_HUMAN SYNGR2 protein OS=Homo sapiens GN=SYNGR2 PE=2 SV=1	30926	24	0.11	1(0)
Q52LJ0	FA98B_HUMAN Protein FAM98B OS=Homo sapiens GN=FAM98B PE=1 SV=1	37566	24	0.09	1(0)
Q5BQ95	Q5BQ95_HUMAN Kallikrein 13 splice variant 7 OS=Homo sapiens GN=KLK13 PE=2 SV=1	10964	24	0.31	1(0)
Q5SQT6	Q5SQT6_HUMAN Inorganic pyrophosphatase OS=Homo sapiens GN=PPA1 PE=2 SV=1	20254	24	0.36	2(0)
Q9UM11-2	FZR_HUMAN Isoform 2 of Fizzy-related protein homolog OS=Homo sapiens GN=FZR1	55131	24	0.06	2(0)
B2R6F3	B2R6F3_HUMAN Splicing factor arginine/serine-rich 3 OS=Homo sapiens GN=SFRS3 PE=2 SV=1	19546	23	0.17	1(0)
B2R7C7	B2R7C7_HUMAN Alkaline phosphatase OS=Homo sapiens PE=2 SV=1	58159	23	0.06	1(0)
B2R7E8	B2R7E8_HUMAN cDNA, FLJ93412, highly similar to Homo sapiens replication protein A2, 32kDa (RPA2), mRNA OS=Homo sapiens PE=2 SV=1	29358	23	0.11	2(0)
B2RDK6	B2RDK6_HUMAN cDNA, FLJ96656, highly similar to Homo sapiens SPFH domain family, member 1 (SPFH1), mRNA OS=Homo sapiens PE=2 SV=1	39058	23	0.08	1(0)
B2RDY9	B2RDY9_HUMAN Adenylyl cyclase-associated protein OS=Homo sapiens PE=2 SV=1	51868	23	0.13	3(0)
B3KM36	B3KM36_HUMAN cDNA FLJ10153 fis, clone HEMBA1003417, highly similar to BAG family molecular chaperone regulator 2 OS=Homo sapiens PE=2 SV=1	23925	23	0.14	1(0)
B7Z792	B7Z792_HUMAN cDNA FLJ53932, highly similar to NADH-ubiquinone oxidoreductase 49 kDa subunit, mitochondrial (EC 1.6.5.3) OS=Homo sapiens PE=2 SV=1	46709	23	0.07	1(0)
C9J1E7	C9J1E7_HUMAN AP-1 complex subunit beta-1 (Fragment) OS=Homo sapiens GN=AP1B1 PE=2 SV=1	66014	23	0.05	2(0)
C9JTF8	C9JTF8_HUMAN Solute carrier family 22 member 16 (Fragment) OS=Homo sapiens GN=SLC22A16 PE=2 SV=1	30356	23	0.11	1(0)
E5RIY1	E5RIY1_HUMAN Serine/threonine-protein phosphatase 2A 55 kDa regulatory subunit B alpha isoform OS=Homo sapiens GN=PPP2R2A PE=2 SV=1	14798	23	0.23	1(0)
F5GWV0	F5GWV0_HUMAN Armadillo repeat-containing protein 6 (Fragment) OS=Homo sapiens GN=ARMC6 PE=2 SV=1	28560	23	0.25	2(0)
H0Y5W0	H0Y5W0_HUMAN E3 ubiquitin-protein ligase HUWE1 (Fragment) OS=Homo sapiens GN=HUWE1 PE=4 SV=1	376696	23	0.01	1(0)
H0YH88	H0YH88_HUMAN Nucleosome assembly protein 1-like 1 (Fragment) OS=Homo sapiens GN=NAP1L1 PE=3 SV=1	21179	23	0.16	1(0)
H3BPG7	H3BPG7_HUMAN Anamorsin OS=Homo sapiens GN=CIAPIN1 PE=2 SV=1	26306	23	0.13	1(0)
I4AY87	I4AY87_HUMAN Macrophage migration inhibitory factor (Fragment) OS=Homo sapiens PE=2 SV=1	12639	23	0.27	2(0)
Q5SZB4	CI050_HUMAN Uncharacterized protein C9orf50 OS=Homo sapiens GN=C9orf50 PE=2 SV=1	48180	23	0.07	3(0)
Q6EHZ3	Q6EHZ3_HUMAN Putative uncharacterized protein STRF8 OS=Homo sapiens GN=STRF8 PE=2 SV=1	41361	23	0.08	1(0)
Q8IZS8	CA2D3_HUMAN Voltage-dependent calcium channel subunit alpha-2/delta-3 OS=Homo sapiens GN=CACNA2D3 PE=1 SV=1	124074	23	0.03	1(0)
Q9HB00	Q9HB00_HUMAN Desmocollin 1, isoform CRA_b OS=Homo sapiens GN=DSC1 PE=2 SV=1	94916	23	0.03	1(0)
Q9NQ39	RS10L_HUMAN Putative 40S ribosomal protein S10-like OS=Homo sapiens GN=RPS10P5 PE=5 SV=1	20279	23	0.17	1(0)
Q9UHR6	ZNHI2_HUMAN Zinc finger HIT domain-containing protein 2 OS=Homo sapiens GN=ZNHIT2 PE=1 SV=1	43541	23	0.08	1(0)
Q9Y5S9	RBM8A_HUMAN RNA-binding protein 8A OS=Homo sapiens GN=RBM8A PE=1 SV=1	19934	23	0.17	1(0)
A0JLQ5	A0JLQ5_HUMAN BXDC2 protein (Fragment) OS=Homo sapiens GN=BXDC2 PE=2 SV=1	39430	22	0.09	1(0)
A4D0R1	A4D0R1_HUMAN Synaptophysin-like 1, isoform CRA_a OS=Homo sapiens GN=SYPL PE=2 SV=1	28889	22	0.12	1(0)
A4LAA3	A4LAA3_HUMAN Alpha thalassemia/mental retardation syndrome X-linked OS=Homo sapiens GN=ATRX PE=4 SV=1	284864	22	0.01	1(0)
B4DM22	B4DM22_HUMAN cDNA FLJ53357, highly similar to 26S proteasome non-ATPase regulatory subunit 2 OS=Homo sapiens PE=2 SV=1	99992	22	0.03	2(0)
B4DXJ6	B4DXJ6_HUMAN cDNA FLJ61453, highly similar to Adapter-relatedprotein complex 2 alpha- 1 subunit OS=Homo sapiens PE=2 SV=1	55511	22	0.06	1(0)
B8ZZ54	B8ZZ54_HUMAN 10 kDa heat shock protein, mitochondrial OS=Homo sapiens GN=HSPE1 PE=2 SV=1	5187	22	0.7	1(0)
E9PJN9	E9PJN9_HUMAN 40S ribosomal protein S3 (Fragment) OS=Homo sapiens GN=RPS3 PE=2 SV=1	3864	22	0.97	1(0)
H7C0H9	H7C0H9_HUMAN X-ray repair cross-complementing protein 5 (Fragment) OS=Homo sapiens GN=XRCC5 PE=4 SV=1	2265	22	1.81	1(0)
J3QKV7	J3QKV7_HUMAN Developmentally-regulated GTP-binding protein 2 OS=Homo sapiens GN=DRG2 PE=4 SV=1	17370	22	0.2	1(0)
J3QQY2	J3QQY2_HUMAN Transmembrane and coiled-coil domain-containing protein 1 OS=Homo sapiens GN=TMCO1 PE=4 SV=1	11536	22	0.3	1(0)
M0QYV5	M0QYV5_HUMAN ATP-dependent Clp protease proteolytic subunit (Fragment) OS=Homo sapiens GN=CLPP PE=3 SV=1	17380	22	0.19	1(0)
M0R1M6	M0R1M6_HUMAN Ubiquitin-60S ribosomal protein L40 (Fragment) OS=Homo sapiens GN=UBA52 PE=4 SV=1	13023	22	0.26	1(0)
P19623	SPEE_HUMAN Spermidine synthase OS=Homo sapiens GN=SRM PE=1 SV=1	34373	22	0.2	4(0)
Q14204	DYHC1_HUMAN Cytoplasmic dynein 1 heavy chain 1 OS=Homo sapiens GN=DYNC1H1 PE=1 SV=5	534809	22	0.01	2(0)
Q6NWZ1	Q6NWZ1_HUMAN CKAP4 protein (Fragment) OS=Homo sapiens GN=CKAP4 PE=2 SV=1	67948	22	0.1	2(0)
Q9BYX2	TBD2A_HUMAN TBC1 domain family member 2A OS=Homo sapiens GN=TBC1D2 PE=1 SV=3	106260	22	0.03	1(0)
A8K946	A8K946_HUMAN mRNA cap guanine-N7 methyltransferase OS=Homo sapiens PE=2 SV=1	58398	21	0.06	2(0)
B1AZV3	B1AZV3_HUMAN Antigen peptide transporter 1 OS=Homo sapiens GN=TAP1 PE=2 SV=1	87691	21	0.04	1(0)
B3KS36	B3KS36_HUMAN cDNA FLJ35376 fis, clone SKMUS2004044, highly similar to Homo sapiens ribosomal protein L3 (RPL3), transcript variant 2, mRNA OS=Homo sapiens PE=2 SV=1	40234	21	0.17	2(0)
B4DG11	B4DG11_HUMAN cDNA FLJ55382, highly similar to Hsp70-binding protein 1 OS=Homo sapiens PE=2 SV=1	45254	21	0.15	2(0)
B4DJ89	B4DJ89_HUMAN Polymerase (RNA) II (DNA directed) polypeptide E, 25kDa, isoform CRA_c OS=Homo sapiens GN=POLR2E PE=2 SV=1	13539	21	0.25	1(0)
B4DJP0	B4DJP0_HUMAN cDNA FLJ60601, highly similar to Methylosome protein 50 OS=Homo sapiens PE=4 SV=1	12271	21	0.28	1(0)
B4DL31	B4DL31_HUMAN cDNA FLJ52681, highly similar to HLA class I histocompatibility antigen, alpha chain E OS=Homo sapiens PE=2 SV=1	44663	21	0.07	7(0)
B4DRG0	B4DRG0_HUMAN cDNA FLJ51764, highly similar to Histone deacetylase 1 OS=Homo sapiens PE=2 SV=1	33026	21	0.1	1(0)
B4E3S1	B4E3S1_HUMAN cDNA FLJ57040, highly similar to Myosin-9 OS=Homo sapiens PE=2 SV=1	111752	21	0.03	3(0)
B5BU01	B5BU01_HUMAN Eukaryotic translation initiation factor 2 beta OS=Homo sapiens GN=EIF2S2 PE=2 SV=1	38648	21	0.09	1(0)
B7Z6B8	B7Z6B8_HUMAN 2,4-dienoyl-CoA reductase, mitochondrial OS=Homo sapiens GN=DECR1 PE=2 SV=1	35200	21	0.09	1(0)
F4ZW64	F4ZW64_HUMAN NF90a OS=Homo sapiens PE=2 SV=1	76369	21	0.09	4(0)
F8VNT9	F8VNT9_HUMAN CD63 antigen (Fragment) OS=Homo sapiens GN=CD63 PE=2 SV=1	14655	21	0.23	1(0)
G3V1C3	G3V1C3_HUMAN Apoptosis inhibitor 5 OS=Homo sapiens GN=API5 PE=2 SV=1	57867	21	0.06	1(0)
H0Y512	H0Y512_HUMAN Adipocyte plasma membrane-associated protein (Fragment) OS=Homo sapiens GN=APMAP PE=4 SV=1	45662	21	0.07	1(0)
H0Y7V4	H0Y7V4_HUMAN Dynein heavy chain 8, axonemal OS=Homo sapiens GN=DNAH8 PE=2 SV=1	482101	21	0.01	1(0)
H0Y8C3	H0Y8C3_HUMAN Mitochondrial carrier homolog 1 (Fragment) OS=Homo sapiens GN=MTCH1 PE=2 SV=1	43663	21	0.08	1(0)
H9KV87	H9KV87_HUMAN Pecanex-like protein 4 OS=Homo sapiens GN=PCNXL4 PE=2 SV=1	26121	21	0.13	1(0)
K7EL16	K7EL16_HUMAN Hsp70-binding protein 1 (Fragment) OS=Homo sapiens GN=HSPBP1 PE=4 SV=1	23033	21	0.15	1(0)
M0QZR9	M0QZR9_HUMAN ELAV-like protein 1 OS=Homo sapiens GN=ELAVL1 PE=4 SV=1	17178	21	0.2	1(0)
M0R027	M0R027_HUMAN Napsin-A (Fragment) OS=Homo sapiens GN=NAPA PE=4 SV=1	11632	21	0.3	1(0)
P04040	CATA_HUMAN Catalase OS=Homo sapiens GN=CAT PE=1 SV=3	59947	21	0.05	1(0)
P05000	IFNW1_HUMAN Interferon omega-1 OS=Homo sapiens GN=IFNW1 PE=1 SV=2	22533	21	0.15	1(0)
P07814	SYEP_HUMAN Bifunctional glutamate/proline--tRNA ligase OS=Homo sapiens GN=EPRS PE=1 SV=5	172080	21	0.04	4(0)
P35270	SPRE_HUMAN Sepiapterin reductase OS=Homo sapiens GN=SPR PE=1 SV=1	28316	21	0.12	1(0)
Q5QNY5	Q5QNY5_HUMAN Peroxisomal biogenesis factor 19 (Fragment) OS=Homo sapiens GN=PEX19 PE=2 SV=1	26291	21	0.13	1(0)
Q5VV89	Q5VV89_HUMAN Microsomal glutathione S-transferase 3 OS=Homo sapiens GN=MGST3 PE=2 SV=1	18690	21	0.18	1(0)
Q9BVP2	GNL3_HUMAN Guanine nucleotide-binding protein-like 3 OS=Homo sapiens GN=GNL3 PE=1 SV=2	62468	21	0.05	1(0)
Q9UKX7	NUP50_HUMAN Nuclear pore complex protein Nup50 OS=Homo sapiens GN=NUP50 PE=1 SV=2	50512	21	0.07	1(0)
Q9Y4X5	ARI1_HUMAN E3 ubiquitin-protein ligase ARIH1 OS=Homo sapiens GN=ARIH1 PE=1 SV=2	65900	21	0.05	1(0)
A4UJ43	A4UJ43_HUMAN Brain type mu-glutathione S-transferase OS=Homo sapiens GN=GSTM3 PE=2 SV=1	25144	20	0.13	1(0)
A8K0T9	A8K0T9_HUMAN cDNA FLJ75422, highly similar to Homo sapiens capping protein (actin filament) muscle Z-line, alpha 1, mRNA OS=Homo sapiens PE=2 SV=1	33059	20	0.1	1(0)
B2RAH7	B2RAH7_HUMAN cDNA, FLJ94921, highly similar to Homo sapiens prolyl endopeptidase (PREP), mRNA OS=Homo sapiens PE=2 SV=1	81594	20	0.04	1(0)
B2RE56	B2RE56_HUMAN Peptidyl-prolyl cis-trans isomerase OS=Homo sapiens PE=2 SV=1	18225	20	0.19	2(0)
B3KMV5	B3KMV5_HUMAN cDNA FLJ12728 fis, clone NT2RP2000040, highly similar to Protein FAM62A OS=Homo sapiens PE=2 SV=1	123342	20	0.03	1(0)
B3KRC6	B3KRC6_HUMAN cDNA FLJ34004 fis, clone FCBBF1000232, highly similar to Cytochrome P450 51A1 (EC 1.14.13.70) OS=Homo sapiens PE=2 SV=1	51732	20	0.06	1(0)
B3KRD4	B3KRD4_HUMAN cDNA FLJ34067 fis, clone FCBBF3001914, highly similar to Chromodomain helicase-DNA-binding protein 5 (EC 3.6.1.-) OS=Homo sapiens PE=2 SV=1	113465	20	0.03	1(0)
B3KTR3	B3KTR3_HUMAN cDNA FLJ38640 fis, clone HHDPC2003472, highly similar to CHLORIDE INTRACELLULAR CHANNEL PROTEIN 4 OS=Homo sapiens PE=2 SV=1	26848	20	0.12	1(0)
B3KXH0	B3KXH0_HUMAN cDNA FLJ45395 fis, clone BRHIP3027191, highly similar to 150 kDa oxygen-regulated protein (Orp150) OS=Homo sapiens PE=2 SV=1	110601	20	0.03	2(0)
B4DHQ6	B4DHQ6_HUMAN Sorcin OS=Homo sapiens GN=SRI PE=2 SV=1	17419	20	0.19	1(0)
B4DR45	B4DR45_HUMAN cDNA FLJ61339, highly similar to Alanyl-tRNA synthetase (EC 6.1.1.7) OS=Homo sapiens PE=2 SV=1	110017	20	0.03	2(0)
B4E1Q0	B4E1Q0_HUMAN cDNA FLJ59603, highly similar to Serine/threonine-protein phosphatase 2A 65 kDa regulatory subunit A alpha isoform OS=Homo sapiens PE=2 SV=1	17409	20	0.19	1(0)
C9IZX5	C9IZX5_HUMAN Mycophenolic acid acyl-glucuronide esterase, mitochondrial OS=Homo sapiens GN=ABHD10 PE=2 SV=1	22355	20	0.15	1(0)
D3DVD8	D3DVD8_HUMAN Spectrin, alpha, erythrocytic 1 (Elliptocytosis 2), isoform CRA_c OS=Homo sapiens GN=SPTA1 PE=4 SV=1	178906	20	0.02	1(0)
G3XAD8	G3XAD8_HUMAN Stress-induced-phosphoprotein 1 OS=Homo sapiens GN=STIP1 PE=2 SV=1	68721	20	0.05	2(0)
H0Y4R1	H0Y4R1_HUMAN Inosine-5~-monophosphate dehydrogenase 2 (Fragment) OS=Homo sapiens GN=IMPDH2 PE=3 SV=1	51549	20	0.06	1(0)
H0Y4X3	H0Y4X3_HUMAN RNA-binding protein 39 (Fragment) OS=Homo sapiens GN=RBM39 PE=4 SV=1	36959	20	0.19	2(0)
H0Y8Y3	H0Y8Y3_HUMAN PDZ and LIM domain protein 5 (Fragment) OS=Homo sapiens GN=PDLIM5 PE=4 SV=1	25422	20	0.13	1(0)
H0YAL7	H0YAL7_HUMAN Eukaryotic translation elongation factor 1 epsilon-1 (Fragment) OS=Homo sapiens GN=EEF1E1 PE=4 SV=1	15444	20	0.22	1(0)
J3KR24	J3KR24_HUMAN Isoleucine--tRNA ligase, cytoplasmic OS=Homo sapiens GN=IARS PE=4 SV=1	132820	20	0.02	2(0)
O14684	PTGES_HUMAN Prostaglandin E synthase OS=Homo sapiens GN=PTGES PE=1 SV=2	17319	20	0.2	1(0)
O95363	SYFM_HUMAN Phenylalanine--tRNA ligase, mitochondrial OS=Homo sapiens GN=FARS2 PE=1 SV=1	52666	20	0.06	2(0)
Q14773	ICAM4_HUMAN Intercellular adhesion molecule 4 OS=Homo sapiens GN=ICAM4 PE=2 SV=1	29703	20	0.11	1(0)
Q5VTI5	Q5VTI5_HUMAN Pleckstrin homology domain-containing family A member 6 OS=Homo sapiens GN=PLEKHA6 PE=2 SV=1	119674	20	0.03	1(0)
Q6NZ55	Q6NZ55_HUMAN 60S ribosomal protein L13 OS=Homo sapiens GN=RPL13 PE=2 SV=1	24308	20	0.14	2(0)
Q8N309	LRC43_HUMAN Leucine-rich repeat-containing protein 43 OS=Homo sapiens GN=LRRC43 PE=2 SV=2	73489	20	0.04	1(0)
Q8TCS8	PNPT1_HUMAN Polyribonucleotide nucleotidyltransferase 1, mitochondrial OS=Homo sapiens GN=PNPT1 PE=1 SV=2	86524	20	0.04	1(0)
Q96RK1	CITE4_HUMAN Cbp/p300-interacting transactivator 4 OS=Homo sapiens GN=CITED4 PE=1 SV=1	18671	20	0.16	1(0)
Q9BS26	ERP44_HUMAN Endoplasmic reticulum resident protein 44 OS=Homo sapiens GN=ERP44 PE=1 SV=1	47341	20	0.07	1(0)
Q9UKU6	TRHDE_HUMAN Thyrotropin-releasing hormone-degrading ectoenzyme OS=Homo sapiens GN=TRHDE PE=2 SV=1	117439	20	0.03	1(0)
A8K5F3	A8K5F3_HUMAN cDNA FLJ75466, highly similar to Homo sapiens Ras association (RalGDS/AF-6) domain family 5 (RASSF5), transcript variant 1, mRNA OS=Homo sapiens PE=2 SV=1	47674	19	0.07	1(0)
B2R665	B2R665_HUMAN cDNA, FLJ92810, highly similar to Homo sapiens protein phosphatase 1G (formerly 2C), magnesium-dependent, gamma isoform (PPM1G), mRNA OS=Homo sapiens PE=2 SV=1	59889	19	0.11	3(0)
B3KN02	B3KN02_HUMAN cDNA FLJ13106 fis, clone NT2RP3002455, highly similar to DnaJ homolog subfamily C member 13 OS=Homo sapiens PE=2 SV=1	100033	19	0.03	1(0)
B3KXS5	B3KXS5_HUMAN Lon protease homolog, mitochondrial OS=Homo sapiens PE=2 SV=1	103553	19	0.03	1(0)
B4DE40	B4DE40_HUMAN Spermine synthase OS=Homo sapiens GN=SMS PE=2 SV=1	31596	19	0.11	1(0)
B4DKH7	B4DKH7_HUMAN Sorting nexin-11 OS=Homo sapiens GN=SNX11 PE=2 SV=1	23358	19	0.14	1(0)
B4DUX0	B4DUX0_HUMAN Cytosolic acyl coenzyme A thioester hydrolase OS=Homo sapiens GN=ACOT7 PE=2 SV=1	29854	19	0.11	1(0)
B4DZ87	B4DZ87_HUMAN cDNA FLJ57240, highly similar to Mitochondrial proteins import receptor OS=Homo sapiens PE=2 SV=1	57579	19	0.06	1(0)
B7Z3E2	B7Z3E2_HUMAN Serine/threonine-protein phosphatase 6 catalytic subunit OS=Homo sapiens GN=PPP6C PE=2 SV=1	18306	19	0.18	1(0)
F5GX11	F5GX11_HUMAN Proteasome subunit alpha type-1 OS=Homo sapiens GN=PSMA1 PE=2 SV=1	26774	19	0.12	1(0)
H0Y4T7	H0Y4T7_HUMAN Metastasis-associated protein MTA1 (Fragment) OS=Homo sapiens GN=MTA1 PE=2 SV=1	57747	19	0.06	2(0)
H0YDT5	H0YDT5_HUMAN Medium-chain-specific acyl-CoA dehydrogenase, mitochondrial (Fragment) OS=Homo sapiens GN=ACADM PE=2 SV=1	7051	19	0.5	1(0)
H0YEP8	H0YEP8_HUMAN Serpin H1 (Fragment) OS=Homo sapiens GN=SERPINH1 PE=3 SV=1	6605	19	0.54	1(0)
H0YLW0	H0YLW0_HUMAN Signal recognition particle 14 kDa protein OS=Homo sapiens GN=SRP14 PE=2 SV=1	5529	19	0.65	2(0)
H0YN26	H0YN26_HUMAN Acidic leucine-rich nuclear phosphoprotein 32 family member A OS=Homo sapiens GN=ANP32A PE=2 SV=1	20099	19	0.17	1(0)
H3BNP6	H3BNP6_HUMAN Adenosine deaminase domain-containing protein 2 (Fragment) OS=Homo sapiens GN=ADAD2 PE=4 SV=1	29109	19	0.11	13(0)
I3L3N5	I3L3N5_HUMAN Platelet-activating factor acetylhydrolase IB subunit alpha (Fragment) OS=Homo sapiens GN=PAFAH1B1 PE=2 SV=1	24132	19	0.14	1(0)
K7ELV2	K7ELV2_HUMAN Nucleoporin SEH1 (Fragment) OS=Homo sapiens GN=SEH1L PE=4 SV=1	29922	19	0.11	1(0)
M0QWZ7	M0QWZ7_HUMAN Serine--tRNA ligase, mitochondrial OS=Homo sapiens GN=SARS2 PE=3 SV=1	58602	19	0.06	1(0)
M0R167	M0R167_HUMAN Zinc finger protein 541 (Fragment) OS=Homo sapiens GN=ZNF541 PE=4 SV=1	95622	19	0.03	1(0)
O00186	STXB3_HUMAN Syntaxin-binding protein 3 OS=Homo sapiens GN=STXBP3 PE=1 SV=2	68633	19	0.05	1(1)
O14732	IMPA2_HUMAN Inositol monophosphatase 2 OS=Homo sapiens GN=IMPA2 PE=1 SV=1	31757	19	0.1	1(0)
O15173	PGRC2_HUMAN Membrane-associated progesterone receptor component 2 OS=Homo sapiens GN=PGRMC2 PE=1 SV=1	23861	19	0.14	1(0)
P30084	ECHM_HUMAN Enoyl-CoA hydratase, mitochondrial OS=Homo sapiens GN=ECHS1 PE=1 SV=4	31823	19	0.1	1(0)
Q4L180	FIL1L_HUMAN Filamin A-interacting protein 1-like OS=Homo sapiens GN=FILIP1L PE=1 SV=2	130928	19	0.02	1(0)
Q5HYE3	Q5HYE3_HUMAN Putative uncharacterized protein DKFZp686H1812 OS=Homo sapiens GN=DKFZp686H1812 PE=2 SV=1	46349	19	0.07	2(0)
Q8WYS0	Q8WYS0_HUMAN GL013 OS=Homo sapiens PE=2 SV=1	15378	19	0.22	1(0)
Q9BSF4	CS052_HUMAN Uncharacterized protein C19orf52 OS=Homo sapiens GN=C19orf52 PE=1 SV=2	29500	19	0.11	1(0)
Q9ULC4	MCTS1_HUMAN Malignant T-cell-amplified sequence 1 OS=Homo sapiens GN=MCTS1 PE=1 SV=1	20770	19	0.16	1(0)
Q9Y3C6	PPIL1_HUMAN Peptidyl-prolyl cis-trans isomerase-like 1 OS=Homo sapiens GN=PPIL1 PE=1 SV=1	18339	19	0.18	1(0)
R4GNH3	R4GNH3_HUMAN 26S protease regulatory subunit 6A OS=Homo sapiens GN=PSMC3 PE=4 SV=1	47608	19	0.07	1(0)
A8K8X0	A8K8X0_HUMAN cDNA FLJ75187, highly similar to Homo sapiens nap1 P120 OS=Homo sapiens PE=2 SV=1	113035	18	0.03	2(0)
B1AKJ6	B1AKJ6_HUMAN Oxysterol-binding protein OS=Homo sapiens GN=OSBPL9 PE=2 SV=1	84417	18	0.04	1(0)
B3KMV2	B3KMV2_HUMAN cDNA FLJ12717 fis, clone NT2RP1001253, highly similar to Glucosamine-6-phosphate isomerase (EC 3.5.99.6) OS=Homo sapiens PE=2 SV=1	28737	18	0.12	1(0)
B3KW93	B3KW93_HUMAN cDNA FLJ42590 fis, clone BRACE3009708, highly similar to Sodium/potassium-transporting ATPase alpha-2chain (EC 3.6.3.9) OS=Homo sapiens PE=2 SV=1	102434	18	0.03	1(0)
B4DDR2	B4DDR2_HUMAN cDNA FLJ54588, highly similar to Major vault protein OS=Homo sapiens PE=2 SV=1	98526	18	0.03	1(0)
B4DPY2	B4DPY2_HUMAN cDNA FLJ59286, highly similar to Pre-mRNA-processing factor 40 homolog A (Fragment) OS=Homo sapiens PE=2 SV=1	93124	18	0.04	1(0)
B4DTA2	B4DTA2_HUMAN cDNA FLJ60148, highly similar to Homo sapiens heterogeneous nuclear ribonucleoprotein D-like (HNRPDL), transcript variant 2, mRNA OS=Homo sapiens PE=2 SV=1	30367	18	0.11	1(0)
B4DZC0	B4DZC0_HUMAN cDNA FLJ51771, highly similar to SWI/SNF-related matrix-associatedactin-dependent regulator of chromatin subfamily A member5 (EC 3.6.1.-) OS=Homo sapiens PE=2 SV=1	117367	18	0.03	1(0)
B4E0S6	B4E0S6_HUMAN cDNA FLJ55635, highly similar to pre-mRNA-splicing factorATP-dependent RNA helicase DHX15 (EC 3.6.1.-) OS=Homo sapiens PE=2 SV=1	90289	18	0.04	1(0)
B7ZAY8	B7ZAY8_HUMAN cDNA, FLJ79352 OS=Homo sapiens PE=2 SV=1	33662	18	0.1	1(0)
D3DUZ3	D3DUZ3_HUMAN Interferon, gamma-inducible protein 16, isoform CRA_a OS=Homo sapiens GN=IFI16 PE=4 SV=1	82827	18	0.04	1(0)
E7EN38	E7EN38_HUMAN DNA repair protein RAD50 (Fragment) OS=Homo sapiens GN=RAD50 PE=2 SV=1	77138	18	0.04	1(0)
E9PIN3	E9PIN3_HUMAN Nuclear RNA export factor 1 (Fragment) OS=Homo sapiens GN=NXF1 PE=2 SV=1	68578	18	0.05	1(0)
F5GX68	F5GX68_HUMAN Cytosine-specific methyltransferase OS=Homo sapiens GN=DNMT1 PE=2 SV=1	185605	18	0.02	1(0)
F8WA66	F8WA66_HUMAN ATP-dependent DNA helicase Q1 (Fragment) OS=Homo sapiens GN=RECQL PE=2 SV=1	22447	18	0.15	1(0)
H0Y5G7	H0Y5G7_HUMAN Neuroblastoma-amplified sequence (Fragment) OS=Homo sapiens GN=NBAS PE=4 SV=1	162592	18	0.02	1(0)
H0Y9Q1	H0Y9Q1_HUMAN Cytosol aminopeptidase (Fragment) OS=Homo sapiens GN=LAP3 PE=2 SV=1	22641	18	0.15	2(0)
H0YJH7	H0YJH7_HUMAN Thymopentin (Fragment) OS=Homo sapiens GN=TMPO PE=2 SV=1	26907	18	0.12	1(0)
H0YKT8	H0YKT8_HUMAN Proteasome subunit beta type (Fragment) OS=Homo sapiens GN=PSMA4 PE=2 SV=1	20347	18	0.17	1(0)
H0YMV8	H0YMV8_HUMAN 40S ribosomal protein S27 OS=Homo sapiens GN=RPS27L PE=2 SV=1	11851	18	0.29	1(0)
H0YNU5	H0YNU5_HUMAN Bloom syndrome protein OS=Homo sapiens GN=BLM PE=2 SV=1	145978	18	0.02	1(0)
H3BQ23	H3BQ23_HUMAN Anamorsin (Fragment) OS=Homo sapiens GN=CIAPIN1 PE=2 SV=1	13738	18	0.25	1(0)
H7C1P0	H7C1P0_HUMAN Replication factor C subunit 4 (Fragment) OS=Homo sapiens GN=RFC4 PE=2 SV=1	11899	18	0.29	1(0)
H7C1V0	H7C1V0_HUMAN Cathepsin D light chain (Fragment) OS=Homo sapiens GN=CTSD PE=2 SV=1	20587	18	0.16	2(0)
H7C5W9	H7C5W9_HUMAN Sarcoplasmic/endoplasmic reticulum calcium ATPase 2 (Fragment) OS=Homo sapiens GN=ATP2A2 PE=3 SV=1	104121	18	0.03	2(0)
J3KMX1	J3KMX1_HUMAN Nuclear pore complex protein Nup88 (Fragment) OS=Homo sapiens GN=NUP88 PE=4 SV=1	80029	18	0.04	1(0)
J3KSS0	J3KSS0_HUMAN 60S ribosomal protein L26 OS=Homo sapiens GN=RPL26 PE=4 SV=1	7570	18	0.47	1(0)
K7ENX7	K7ENX7_HUMAN cAMP-specific 3~,5~-cyclic phosphodiesterase 4A (Fragment) OS=Homo sapiens GN=PDE4A PE=4 SV=1	32217	18	0.1	1(0)
M0QXH4	M0QXH4_HUMAN Hyaluronan synthase 1 OS=Homo sapiens GN=HAS1 PE=4 SV=1	24016	18	0.14	3(0)
P83111	LACTB_HUMAN Serine beta-lactamase-like protein LACTB, mitochondrial OS=Homo sapiens GN=LACTB PE=1 SV=2	61111	18	0.05	1(0)
Q2M272	Q2M272_HUMAN Protocadherin gamma subfamily C, 5, isoform 2 OS=Homo sapiens GN=PCDHGC5 PE=2 SV=1	95688	18	0.03	1(0)
Q56VW8	Q56VW8_HUMAN Lung cancer-related protein 9 OS=Homo sapiens PE=2 SV=1	52186	18	0.06	1(0)
Q9Y3A5	SBDS_HUMAN Ribosome maturation protein SBDS OS=Homo sapiens GN=SBDS PE=1 SV=4	29030	18	0.11	2(0)
A2VCR0	A2VCR0_HUMAN MAPRE1 protein (Fragment) OS=Homo sapiens GN=MAPRE1 PE=2 SV=1	19510	17	0.17	3(0)
A8K132	A8K132_HUMAN cDNA FLJ75476, highly similar to Homo sapiens glutaminase (GLS), mRNA OS=Homo sapiens PE=2 SV=1	74317	17	0.04	6(3)
A8K4H7	A8K4H7_HUMAN Amidophosphoribosyltransferase OS=Homo sapiens GN=PPAT PE=2 SV=1	58161	17	0.06	1(0)
B0QY89	B0QY89_HUMAN Eukaryotic translation initiation factor 3 subunit L OS=Homo sapiens GN=EIF3L PE=2 SV=1	71085	17	0.05	1(0)
B4DLB8	B4DLB8_HUMAN cDNA FLJ52205, highly similar to Beta-1,4-galactosyltransferase 1 (EC 2.4.1.-) OS=Homo sapiens PE=2 SV=1	40269	17	0.08	1(0)
B4DUH1	B4DUH1_HUMAN cDNA FLJ51323, highly similar to Short-chain specific acyl-CoA dehydrogenase, mitochondrial (EC 1.3.99.2) OS=Homo sapiens PE=2 SV=1	44116	17	0.07	1(0)
B4E091	B4E091_HUMAN cDNA FLJ55438, highly similar to Splicing factor 3 subunit 1 OS=Homo sapiens PE=2 SV=1	77415	17	0.04	2(0)
D6R9I9	D6R9I9_HUMAN ATP-binding cassette sub-family E member 1 OS=Homo sapiens GN=ABCE1 PE=2 SV=1	47919	17	0.07	2(0)
E9PIY4	E9PIY4_HUMAN Diphthamide biosynthesis protein 2 OS=Homo sapiens GN=DPH2 PE=2 SV=1	10803	17	0.32	1(0)
F8W7C6	F8W7C6_HUMAN 60S ribosomal protein L10 OS=Homo sapiens GN=RPL10 PE=2 SV=1	18808	17	0.18	1(0)
H0Y4P7	H0Y4P7_HUMAN Collagen alpha-1(XII) chain (Fragment) OS=Homo sapiens GN=COL12A1 PE=4 SV=1	70922	17	0.05	1(0)
H0Y6Y4	H0Y6Y4_HUMAN Ubiquitin carboxyl-terminal hydrolase isozyme L5 (Fragment) OS=Homo sapiens GN=UCHL5 PE=4 SV=1	25487	17	0.13	1(0)
H0Y8D1	H0Y8D1_HUMAN Trypsin-1 (Fragment) OS=Homo sapiens GN=PRSS1 PE=2 SV=1	15697	17	0.22	1(0)
H0Y9Z8	H0Y9Z8_HUMAN Condensin complex subunit 3 (Fragment) OS=Homo sapiens GN=NCAPG PE=2 SV=1	30654	17	0.11	1(0)
H0YAK4	H0YAK4_HUMAN Neurolysin, mitochondrial (Fragment) OS=Homo sapiens GN=NLN PE=2 SV=1	47166	17	0.07	1(0)
H3BSK9	H3BSK9_HUMAN Ataxin-2-like protein (Fragment) OS=Homo sapiens GN=ATXN2L PE=2 SV=1	37229	17	0.09	1(0)
J3QTA2	J3QTA2_HUMAN BAG family molecular chaperone regulator 1 OS=Homo sapiens GN=BAG1 PE=4 SV=1	38965	17	0.08	2(0)
P27635	RL10_HUMAN 60S ribosomal protein L10 OS=Homo sapiens GN=RPL10 PE=1 SV=4	25044	17	0.13	2(0)
P43034	LIS1_HUMAN Platelet-activating factor acetylhydrolase IB subunit alpha OS=Homo sapiens GN=PAFAH1B1 PE=1 SV=2	47178	17	0.07	3(0)
P80723	BASP1_HUMAN Brain acid soluble protein 1 OS=Homo sapiens GN=BASP1 PE=1 SV=2	22680	17	0.15	1(0)
Q02413	DSG1_HUMAN Desmoglein-1 OS=Homo sapiens GN=DSG1 PE=1 SV=2	114702	17	0.03	1(0)
Q5VUG0	SMBT2_HUMAN Scm-like with four MBT domains protein 2 OS=Homo sapiens GN=SFMBT2 PE=1 SV=1	102095	17	0.03	1(0)
Q8N4M1	CTL3_HUMAN Choline transporter-like protein 3 OS=Homo sapiens GN=SLC44A3 PE=2 SV=4	75103	17	0.04	1(0)
Q96L92	SNX27_HUMAN Sorting nexin-27 OS=Homo sapiens GN=SNX27 PE=1 SV=2	61854	17	0.05	1(0)
A8K6K7	A8K6K7_HUMAN cDNA FLJ76881, highly similar to Homo sapiens glycogen synthase 1 (muscle) (GYS1), mRNA OS=Homo sapiens PE=2 SV=1	84559	16	0.04	1(0)
B2R6D4	B2R6D4_HUMAN cDNA, FLJ92901, highly similar to Homo sapiens phosphomannomutase 2 (PMM2), mRNA OS=Homo sapiens PE=2 SV=1	28378	16	0.12	1(0)
B2R858	B2R858_HUMAN cDNA, FLJ93750, Homo sapiens DEAD (Asp-Glu-Ala-Asp) box polypeptide 6 (DDX6), mRNA OS=Homo sapiens PE=2 SV=1	53582	16	0.06	2(0)
B2RA69	B2RA69_HUMAN cDNA, FLJ94726, highly similar to Homo sapiens C1q and tumor necrosis factor related protein 6 (C1QTNF6), mRNA OS=Homo sapiens PE=2 SV=1	31240	16	0.11	1(0)
B4DVT8	B4DVT8_HUMAN cDNA FLJ60173, highly similar to Zinc-finger protein ZPR1 OS=Homo sapiens PE=2 SV=1	46326	16	0.07	1(0)
B4E366	B4E366_HUMAN cDNA FLJ57781, highly similar to Homo sapiens tRNA-histidine guanylyltransferase 1-like (THG1L), mRNA OS=Homo sapiens PE=2 SV=1	19107	16	0.18	1(0)
F5H1X8	F5H1X8_HUMAN Lipopolysaccharide-responsive and beige-like anchor protein OS=Homo sapiens GN=LRBA PE=2 SV=1	320211	16	0.01	1(0)
G3V480	G3V480_HUMAN Signal recognition particle 54 kDa protein (Fragment) OS=Homo sapiens GN=SRP54 PE=2 SV=1	8221	16	0.43	2(0)
G3XAN4	G3XAN4_HUMAN Nuclear receptor coactivator 3 OS=Homo sapiens GN=TRAM1 PE=2 SV=1	33528	16	0.1	1(0)
H0YC58	H0YC58_HUMAN DBIRD complex subunit KIAA1967 (Fragment) OS=Homo sapiens GN=KIAA1967 PE=4 SV=1	19387	16	0.17	2(0)
H0YCN5	H0YCN5_HUMAN ATP-binding cassette sub-family A member 7 (Fragment) OS=Homo sapiens GN=ABCA7 PE=4 SV=2	65292	16	0.05	2(0)
J3KQB7	J3KQB7_HUMAN Ankyrin and armadillo repeat-containing protein OS=Homo sapiens GN=ANKAR PE=4 SV=1	155555	16	0.02	1(0)
J3KT68	J3KT68_HUMAN Transmembrane protein 97 OS=Homo sapiens GN=TMEM97 PE=4 SV=1	11083	16	0.31	1(0)
J3QRY4	J3QRY4_HUMAN 26S proteasome non-ATPase regulatory subunit 11 (Fragment) OS=Homo sapiens GN=PSMD11 PE=4 SV=1	21452	16	0.16	1(0)
L8EB70	L8EB70_HUMAN Alternative protein MYO19 OS=Homo sapiens GN=MYO19 PE=4 SV=1	7631	16	0.46	1(0)
M0QZR8	M0QZR8_HUMAN DNA polymerase OS=Homo sapiens GN=POLD1 PE=3 SV=1	113097	16	0.03	1(0)
O75396	SC22B_HUMAN Vesicle-trafficking protein SEC22b OS=Homo sapiens GN=SEC22B PE=1 SV=4	24806	16	0.14	1(0)
O95831	AIFM1_HUMAN Apoptosis-inducing factor 1, mitochondrial OS=Homo sapiens GN=AIFM1 PE=1 SV=1	67144	16	0.05	2(0)
P27694	RFA1_HUMAN Replication protein A 70 kDa DNA-binding subunit OS=Homo sapiens GN=RPA1 PE=1 SV=2	68723	16	0.05	1(0)
Q2TB59	Q2TB59_HUMAN Nicotinamide nucleotide transhydrogenase OS=Homo sapiens GN=NNT PE=2 SV=1	114552	16	0.03	1(0)
Q5JB53	Q5JB53_HUMAN Proliferation-inducing gene 6 (Fragment) OS=Homo sapiens PE=2 SV=1	83943	16	0.04	1(0)
Q9BRX5	PSF3_HUMAN DNA replication complex GINS protein PSF3 OS=Homo sapiens GN=GINS3 PE=1 SV=1	24576	16	0.14	1(0)
A2A341	A2A341_HUMAN Synaptonemal complex protein 2 (Fragment) OS=Homo sapiens GN=SYCP2 PE=2 SV=1	117545	15	0.03	1(0)
B0QZK4	B0QZK4_HUMAN Heterochromatin protein 1-binding protein 3 (Fragment) OS=Homo sapiens GN=HP1BP3 PE=2 SV=1	28725	15	0.12	1(0)
B4DKK3	B4DKK3_HUMAN cDNA FLJ54791, highly similar to DnaJ homolog subfamily C member 7 OS=Homo sapiens PE=2 SV=1	42561	15	0.08	1(0)
H0YGH1	H0YGH1_HUMAN Phosphoribosylformylglycinamidine synthase (Fragment) OS=Homo sapiens GN=PFAS PE=4 SV=2	41755	15	0.08	1(0)
I3L1Z2	I3L1Z2_HUMAN Fragile X mental retardation syndrome-related protein 2 (Fragment) OS=Homo sapiens GN=FXR2 PE=2 SV=1	13825	15	0.25	1(0)
Q8NGI2	O52N4_HUMAN Olfactory receptor 52N4 OS=Homo sapiens GN=OR52N4 PE=2 SV=2	36854	15	0.09	1(0)
Q96AG4	LRC59_HUMAN Leucine-rich repeat-containing protein 59 OS=Homo sapiens GN=LRRC59 PE=1 SV=1	35308	15	0.09	1(0)
Q9BUM6	Q9BUM6_HUMAN COL6A2 protein OS=Homo sapiens PE=2 SV=1	48105	15	0.07	1(0)

## Sheet: Table S2 in situ
ID	Description	Mass	Score	emPAI	Peptides Matched
H3BTN5	H3BTN5_HUMAN Pyruvate kinase (Fragment) OS=Homo sapiens GN=PKM PE=2 SV=1	53524	127	0.27	6(3)
B1ALA7	B1ALA7_HUMAN Ribose-phosphate pyrophosphokinase 1 OS=Homo sapiens GN=PRPS1 PE=2 SV=1	18730	46	0.18	1(0)
E5RIU6	E5RIU6_HUMAN Cyclin-dependent kinase 1 (Fragment) OS=Homo sapiens GN=CDK1 PE=2 SV=2	21782	40	0.33	2(0)
Q05655	KPCD_HUMAN Protein kinase C delta type OS=Homo sapiens GN=PRKCD PE=1 SV=2	78652	39	0.05	1(1)
Q8IWB6	TEX14_HUMAN Inactive serine/threonine-protein kinase TEX14 OS=Homo sapiens GN=TEX14 PE=1 SV=2	169107	36	0.02	1(1)		Kinase
B2R5T5	B2R5T5_HUMAN Protein kinase, cAMP-dependent, regulatory, type I, alpha (Tissue specific extinguisher 1), isoform CRA_a OS=Homo sapiens GN=PRKAR1A PE=2 SV=1	43183	34	0.08	1(0)
P78527	PRKDC_HUMAN DNA-dependent protein kinase catalytic subunit OS=Homo sapiens GN=PRKDC PE=1 SV=3	473749	52	0.04	5(0)
H7C175	H7C175_HUMAN Serine/threonine-protein kinase LMTK1 OS=Homo sapiens GN=AATK PE=2 SV=2	135361	32	0.02	1(0)
G3V5T9	G3V5T9_HUMAN Cyclin-dependent kinase 2 OS=Homo sapiens GN=CDK2 PE=2 SV=1	39553	29	0.17	2(0)
Q5R3A8	Q5R3A8_HUMAN Tyrosine-protein kinase Fyn OS=Homo sapiens GN=FYN PE=2 SV=1	55205	25	0.05	2(0)
Q4LE51	Q4LE51_HUMAN PIK3CA variant protein (Fragment) OS=Homo sapiens GN=PIK3CA variant protein PE=2 SV=1	126129	16	0.03	1(0)
B2RBS8	B2RBS8_HUMAN cDNA, FLJ95666, highly similar to Homo sapiens albumin (ALB), mRNA OS=Homo sapiens PE=2 SV=1	71343	543	0.72	36(13)
B4DMA2	B4DMA2_HUMAN cDNA FLJ54023, highly similar to Heat shock protein HSP 90-beta OS=Homo sapiens PE=2 SV=1	79487	527	0.69	22(11)
B0YJC4	B0YJC4_HUMAN Vimentin OS=Homo sapiens GN=VIM PE=2 SV=1	49680	251	0.57	11(6)
F5GWP8	F5GWP8_HUMAN Junction plakoglobin OS=Homo sapiens GN=JUP PE=2 SV=1	66708	245	0.27	9(5)
P25705	ATPA_HUMAN ATP synthase subunit alpha, mitochondrial OS=Homo sapiens GN=ATP5A1 PE=1 SV=1	59828	227	0.38	10(4)
Q5CAQ5	Q5CAQ5_HUMAN Tumor rejection antigen (Gp96) 1 OS=Homo sapiens GN=TRA1 PE=2 SV=1	92567	222	0.19	6(5)
Q5HY54	Q5HY54_HUMAN Filamin-A OS=Homo sapiens GN=FLNA PE=2 SV=1	279115	197	0.12	11(4)
Q1KLZ0	Q1KLZ0_HUMAN HCG15971, isoform CRA_a OS=Homo sapiens GN=PS1TP5BP1 PE=2 SV=1	42052	182	0.35	13(5)
Q06830	PRDX1_HUMAN Peroxiredoxin-1 OS=Homo sapiens GN=PRDX1 PE=1 SV=1	22324	160	1.01	6(3)
Q53HU0	Q53HU0_HUMAN Chaperonin containing TCP1, subunit 8 (Theta) variant (Fragment) OS=Homo sapiens PE=2 SV=1	60183	158	0.24	6(2)
Q2TSD0	Q2TSD0_HUMAN Glyceraldehyde-3-phosphate dehydrogenase OS=Homo sapiens PE=2 SV=1	36197	152	0.3	6(4)
H3BQN4	H3BQN4_HUMAN Fructose-bisphosphate aldolase OS=Homo sapiens GN=ALDOA PE=2 SV=1	39772	139	0.17	4(2)
B4DLN6	B4DLN6_HUMAN cDNA FLJ59033, highly similar to Protein disulfide-isomerase (EC 5.3.4.1) OS=Homo sapiens PE=2 SV=1	51555	138	0.36	6(3)
P01008	ANT3_HUMAN Antithrombin-III OS=Homo sapiens GN=SERPINC1 PE=1 SV=1	53025	136	0.13	6(3)
E9PKE3	E9PKE3_HUMAN Heat shock cognate 71 kDa protein OS=Homo sapiens GN=HSPA8 PE=2 SV=1	68991	132	0.2	7(3)
P13639	EF2_HUMAN Elongation factor 2 OS=Homo sapiens GN=EEF2 PE=1 SV=4	96246	132	0.31	9(2)
B4DNN4	B4DNN4_HUMAN Ribonucleoside-diphosphate reductase OS=Homo sapiens PE=2 SV=1	87252	127	0.12	4(2)
A8K525	A8K525_HUMAN cDNA FLJ76817, highly similar to Homo sapiens non-POU domain containing, octamer-binding (NONO), mRNA OS=Homo sapiens PE=2 SV=1	54367	119	0.19	6(3)
Q5VTE0	EF1A3_HUMAN Putative elongation factor 1-alpha-like 3 OS=Homo sapiens GN=EEF1A1P5 PE=5 SV=1	50495	118	0.29	6(4)
B3KTV0	B3KTV0_HUMAN cDNA FLJ38781 fis, clone LIVER2000216, highly similar to HEAT SHOCK COGNATE 71 kDa PROTEIN OS=Homo sapiens PE=2 SV=1	68166	117	0.33	6(3)
B7Z2Z8	B7Z2Z8_HUMAN T-complex protein 1 subunit delta OS=Homo sapiens PE=2 SV=1	52781	111	0.2	5(3)
Q8TA90	Q8TA90_HUMAN Similar to Elongation factor 2b (Fragment) OS=Homo sapiens PE=2 SV=1	58148	110	0.39	7(2)
G3V0E5	G3V0E5_HUMAN Transferrin receptor (P90, CD71), isoform CRA_c OS=Homo sapiens GN=TFRC PE=2 SV=1	76259	106	0.09	2(2)
Q53HV2	Q53HV2_HUMAN Chaperonin containing TCP1, subunit 7 (Eta) variant (Fragment) OS=Homo sapiens PE=2 SV=1	59816	102	0.31	5(4)
B2RDX5	B2RDX5_HUMAN cDNA, FLJ96812, highly similar to Homo sapiens threonyl-tRNA synthetase (TARS), mRNA OS=Homo sapiens PE=2 SV=1	82974	101	0.08	2(2)
B4DGB4	B4DGB4_HUMAN Plastin-3 OS=Homo sapiens GN=PLS3 PE=2 SV=1	69820	101	0.15	4(1)
B2R984	B2R984_HUMAN cDNA, FLJ94268, highly similar to Homo sapiens histone 1, H1e (HIST1H1E), mRNA OS=Homo sapiens PE=2 SV=1	21880	100	0.33	3(3)
Q0QER2	Q0QER2_HUMAN Isocitrate dehydrogenase [NADP] (Fragment) OS=Homo sapiens GN=IDH1 PE=2 SV=1	42091	100	0.16	2(2)
H0YEU2	H0YEU2_HUMAN 40S ribosomal protein S3 (Fragment) OS=Homo sapiens GN=RPS3 PE=3 SV=1	18774	99	1.28	7(2)
Q6I9V5	Q6I9V5_HUMAN SLC25A6 protein OS=Homo sapiens GN=SLC25A6 PE=2 SV=1	33073	99	0.61	7(2)
J3KQE5	J3KQE5_HUMAN GTP-binding nuclear protein Ran (Fragment) OS=Homo sapiens GN=RAN PE=4 SV=1	27027	98	0.26	5(3)
Q6IBT3	Q6IBT3_HUMAN CCT7 protein OS=Homo sapiens GN=CCT7 PE=2 SV=1	59804	96	0.17	3(3)
B4DDB6	B4DDB6_HUMAN Heterogeneous nuclear ribonucleoprotein A3, isoform CRA_a OS=Homo sapiens GN=HNRPA3 PE=2 SV=1	37234	92	0.19	6(2)
Q9BSV4	Q9BSV4_HUMAN SFPQ protein (Fragment) OS=Homo sapiens GN=SFPQ PE=2 SV=2	68702	92	0.1	2(1)
B7Z4V2	B7Z4V2_HUMAN cDNA FLJ51907, highly similar to Stress-70 protein, mitochondrial OS=Homo sapiens PE=2 SV=1	72641	91	0.09	2(1)
P22314	UBA1_HUMAN Ubiquitin-like modifier-activating enzyme 1 OS=Homo sapiens GN=UBA1 PE=1 SV=3	118858	90	0.06	2(2)
Q00610	CLH1_HUMAN Clathrin heavy chain 1 OS=Homo sapiens GN=CLTC PE=1 SV=5	193260	88	0.05	3(2)
Q0VAS5	Q0VAS5_HUMAN Histone H4 OS=Homo sapiens GN=HIST1H4H PE=3 SV=1	11364	88	0.7	4(2)
B4DUQ1	B4DUQ1_HUMAN cDNA FLJ54552, highly similar to Heterogeneous nuclear ribonucleoprotein K OS=Homo sapiens PE=2 SV=1	48708	87	0.14	2(2)
F5GWF6	F5GWF6_HUMAN T-complex protein 1 subunit beta OS=Homo sapiens GN=CCT2 PE=2 SV=2	57170	87	0.12	2(2)
B4DSR0	B4DSR0_HUMAN cDNA FLJ60080, highly similar to 130 kDa leucine-rich protein (LRP 130) (Fragment) OS=Homo sapiens PE=2 SV=1	124309	86	0.05	2(2)
Q15149-2	PLEC_HUMAN Isoform 2 of Plectin OS=Homo sapiens GN=PLEC	520095	84	0.04	7(1)
H0YL69	H0YL69_HUMAN Proteasome subunit alpha type (Fragment) OS=Homo sapiens GN=PSMA4 PE=2 SV=1	26645	81	0.42	3(3)
Q9NR30	DDX21_HUMAN Nucleolar RNA helicase 2 OS=Homo sapiens GN=DDX21 PE=1 SV=5	87804	80	0.12	5(0)
C9JI87	C9JI87_HUMAN Voltage-dependent anion-selective channel protein 1 (Fragment) OS=Homo sapiens GN=VDAC1 PE=2 SV=1	20418	78	0.36	2(1)
P49327	FAS_HUMAN Fatty acid synthase OS=Homo sapiens GN=FASN PE=1 SV=3	275877	78	0.05	5(0)
B3KXI2	B3KXI2_HUMAN Protein transport protein Sec23A OS=Homo sapiens GN=SEC23A PE=2 SV=1	63574	75	0.05	1(1)
C9JF17	C9JF17_HUMAN Apolipoprotein D (Fragment) OS=Homo sapiens GN=APOD PE=2 SV=1	24541	75	0.29	2(2)
G8JLB6	G8JLB6_HUMAN Heterogeneous nuclear ribonucleoprotein H OS=Homo sapiens GN=HNRNPH1 PE=2 SV=1	51482	75	0.2	5(1)
B2R8F3	B2R8F3_HUMAN cDNA, FLJ93871, highly similar to Homo sapiens melanoma antigen, family B, 2 (MAGEB2), mRNA OS=Homo sapiens PE=2 SV=1	35353	74	0.09	1(1)
B3KTS5	B3KTS5_HUMAN cDNA FLJ38670 fis, clone HSYRA2000190, highly similar to Voltage-dependent anion-selective channel protein 1 OS=Homo sapiens PE=2 SV=1	30839	72	0.11	2(2)
M0QXS5	M0QXS5_HUMAN Heterogeneous nuclear ribonucleoprotein L (Fragment) OS=Homo sapiens GN=HNRNPL PE=4 SV=1	59292	71	0.06	1(1)
Q6NW36	Q6NW36_HUMAN Proteasome (Prosome, macropain) 26S subunit, ATPase, 1 OS=Homo sapiens GN=PSMC1 PE=2 SV=1	49267	71	0.21	3(1)
B4DDU6	B4DDU6_HUMAN cDNA FLJ50442, highly similar to T-complex protein 1 subunit epsilon OS=Homo sapiens PE=2 SV=1	55842	70	0.19	4(2)
B4DTG2	B4DTG2_HUMAN Elongation factor 1-gamma OS=Homo sapiens GN=EEF1G PE=2 SV=1	56456	70	0.12	2(1)
B3GQS7	B3GQS7_HUMAN Mitochondrial heat shock 60kD protein 1 variant 1 OS=Homo sapiens GN=HSPD1 PE=2 SV=1	60813	69	0.23	5(2)
B4DFL1	B4DFL1_HUMAN Dihydrolipoyl dehydrogenase OS=Homo sapiens PE=2 SV=1	49381	68	0.07	1(1)
G3V295	G3V295_HUMAN Proteasome subunit alpha type OS=Homo sapiens GN=PSMA6 PE=2 SV=1	23226	68	0.14	1(1)
B4YAH7	B4YAH7_HUMAN ALDH2 (Fragment) OS=Homo sapiens GN=ALDH2 PE=2 SV=1	26844	67	0.42	4(1)
Q1RMG2	Q1RMG2_HUMAN Adenosylhomocysteinase OS=Homo sapiens GN=AHCY PE=2 SV=1	34188	67	0.2	2(2)
B4DFR3	B4DFR3_HUMAN cDNA FLJ55771, highly similar to Lamin-A/C OS=Homo sapiens PE=2 SV=1	25697	66	0.13	1(1)
H3BPS8	H3BPS8_HUMAN Fructose-bisphosphate aldolase A (Fragment) OS=Homo sapiens GN=ALDOA PE=2 SV=1	30693	66	0.36	3(1)
B2R8Z8	B2R8Z8_HUMAN cDNA, FLJ94136, highly similar to Homo sapiens synaptotagmin binding, cytoplasmic RNA interacting protein (SYNCRIP), mRNA OS=Homo sapiens PE=2 SV=1	69787	65	0.15	3(1)
B3KM80	B3KM80_HUMAN Nucleolin, isoform CRA_c OS=Homo sapiens GN=NCL PE=2 SV=1	58576	65	0.18	3(1)
J3KTA4	J3KTA4_HUMAN Probable ATP-dependent RNA helicase DDX5 OS=Homo sapiens GN=DDX5 PE=3 SV=1	69557	65	0.2	4(0)
P25311	ZA2G_HUMAN Zinc-alpha-2-glycoprotein OS=Homo sapiens GN=AZGP1 PE=1 SV=2	34465	65	0.2	2(1)
Q6NZ52	Q6NZ52_HUMAN Ribosomal protein L27a OS=Homo sapiens GN=RPL27A PE=2 SV=1	16582	65	0.2	1(1)
E5RGV0	E5RGV0_HUMAN Heterogeneous nuclear ribonucleoprotein H (Fragment) OS=Homo sapiens GN=HNRNPH1 PE=2 SV=1	17610	64	0.19	2(1)
M0R0Y3	M0R0Y3_HUMAN RuvB-like 2 OS=Homo sapiens GN=RUVBL2 PE=4 SV=1	38845	64	0.28	5(1)
B3KPZ2	B3KPZ2_HUMAN cDNA FLJ32487 fis, clone SKNSH1000002, highly similar to Prostaglandin E synthase 2 (EC 5.3.99.3) OS=Homo sapiens PE=2 SV=1	42114	63	0.08	1(1)
Q5JVS8	Q5JVS8_HUMAN Vimentin (Fragment) OS=Homo sapiens GN=VIM PE=2 SV=1	20138	63	0.36	2(1)
B2R5P6	B2R5P6_HUMAN Thioredoxin reductase 1, cytoplasmic OS=Homo sapiens GN=TXNRD1 PE=2 SV=1	55253	62	0.12	3(1)
B4DPU3	B4DPU3_HUMAN cDNA FLJ56548, highly similar to Elongation factor 2 OS=Homo sapiens PE=2 SV=1	63494	62	0.11	3(1)
H0YD14	H0YD14_HUMAN Myoferlin (Fragment) OS=Homo sapiens GN=MYOF PE=4 SV=1	135822	62	0.05	2(1)
A1XP52	A1XP52_HUMAN Catecholamine-regulated protein 40 OS=Homo sapiens PE=2 SV=1	38236	61	0.09	1(1)
A4ZU86	A4ZU86_HUMAN Truncated nucleolar phosphoprotein B23 OS=Homo sapiens GN=NPM1 PE=2 SV=1	30074	61	0.11	1(1)
Q2MCL6	Q2MCL6_HUMAN Large neutral amino acids transporter 1 (Fragment) OS=Homo sapiens GN=SLC7A5 PE=4 SV=1	7158	60	0.5	1(1)
A1JUI8	A1JUI8_HUMAN Chaperonin subunit 6A (Fragment) OS=Homo sapiens GN=CCT6A PE=2 SV=1	54103	58	0.19	5(1)
A6NE09	A6NE09_HUMAN 40S ribosomal protein SA OS=Homo sapiens GN=RPSAP58 PE=2 SV=1	33002	58	0.1	1(1)
B2RE88	B2RE88_HUMAN cDNA, FLJ96465, highly similar to Homo sapiens solute carrier family 25 (mitochondrial carrier;phosphate carrier), member 3 (SLC25A3), nuclear gene encodingmitochondrial protein, transcript variant 1b, mRNA OS=Homo sapiens PE=2 SV=1	40379	57	0.08	2(1)
Q6NVC0	Q6NVC0_HUMAN SLC25A5 protein (Fragment) OS=Homo sapiens GN=SLC25A5 PE=2 SV=1	35499	57	0.56	7(1)
B3KY95	B3KY95_HUMAN cDNA FLJ16143 fis, clone BRAMY2038516, highly similar to Protein disulfide-isomerase A6 (EC 5.3.4.1) OS=Homo sapiens PE=2 SV=1	53655	56	0.06	2(1)
B4E022	B4E022_HUMAN Transketolase OS=Homo sapiens GN=TKT PE=2 SV=1	63410	56	0.11	2(1)
H0Y8L7	H0Y8L7_HUMAN 40S ribosomal protein S3a (Fragment) OS=Homo sapiens GN=RPS3A PE=2 SV=1	22294	56	0.15	1(1)
B3KT18	B3KT18_HUMAN Glutamate dehydrogenase OS=Homo sapiens PE=2 SV=1	56260	55	0.12	3(1)
B4DJI1	B4DJI1_HUMAN L-lactate dehydrogenase OS=Homo sapiens PE=2 SV=1	33857	55	0.45	6(1)
L0R5C4	L0R5C4_HUMAN Alternative protein POTEM OS=Homo sapiens GN=POTEM PE=3 SV=1	50704	55	0.06	2(1)
A4FU77	A4FU77_HUMAN SNRNP200 protein (Fragment) OS=Homo sapiens GN=SNRNP200 PE=2 SV=1	217585	54	0.01	2(1)
A8K6E4	A8K6E4_HUMAN cDNA FLJ77145, highly similar to Homo sapiens myosin, heavy polypeptide 9, non-muscle (MYH9), mRNA (Fragment) OS=Homo sapiens PE=2 SV=1	117373	54	0.06	4(1)
D6RAC2	D6RAC2_HUMAN Guanine nucleotide-binding protein subunit beta-2-like 1 OS=Homo sapiens GN=GNB2L1 PE=2 SV=1	30131	54	0.23	3(1)
A2RUM7	A2RUM7_HUMAN Ribosomal protein L5 OS=Homo sapiens GN=RPL5 PE=2 SV=1	34569	53	0.1	1(1)
B4DR63	B4DR63_HUMAN 26S protease regulatory subunit 4 OS=Homo sapiens GN=PSMC1 PE=2 SV=1	41255	53	0.08	2(1)
P55072	TERA_HUMAN Transitional endoplasmic reticulum ATPase OS=Homo sapiens GN=VCP PE=1 SV=4	89950	53	0.07	2(1)
Q5TCU6	Q5TCU6_HUMAN Talin-1 OS=Homo sapiens GN=TLN1 PE=2 SV=1	260030	53	0.03	2(1)
M0QZN2	M0QZN2_HUMAN 40S ribosomal protein S5 OS=Homo sapiens GN=RPS5 PE=4 SV=1	14868	52	0.23	1(1)
P11021	GRP78_HUMAN 78 kDa glucose-regulated protein OS=Homo sapiens GN=HSPA5 PE=1 SV=2	72402	52	0.09	3(1)
B2R7P8	B2R7P8_HUMAN cDNA, FLJ93545, highly similar to Homo sapiens 5-aminoimidazole-4-carboxamide ribonucleotide formyltransferase/IMP cyclohydrolase (ATIC), mRNA OS=Homo sapiens PE=2 SV=1	65108	51	0.16	3(1)
A2A3R5	A2A3R5_HUMAN 40S ribosomal protein S6 OS=Homo sapiens GN=RPS6 PE=2 SV=1	25067	50	0.13	1(1)
A8K766	A8K766_HUMAN cDNA FLJ77343, highly similar to Homo sapiens electron-transfer-flavoprotein, beta polypeptide(ETFB), mRNA OS=Homo sapiens PE=2 SV=1	28132	50	0.12	1(1)
J3QSB4	J3QSB4_HUMAN 60S ribosomal protein L13 (Fragment) OS=Homo sapiens GN=RPL13 PE=3 SV=1	14740	50	0.23	1(1)
Q96HU8	DIRA2_HUMAN GTP-binding protein Di-Ras2 OS=Homo sapiens GN=DIRAS2 PE=1 SV=1	22813	50	0.15	1(1)
A5PLK7	A5PLK7_HUMAN RCC2 protein (Fragment) OS=Homo sapiens GN=RCC2 PE=2 SV=1	50331	49	0.07	1(1)
B2R5U1	B2R5U1_HUMAN cDNA, FLJ92620, highly similar to Homo sapiens staphylococcal nuclease domain containing 1 (SND1),mRNA OS=Homo sapiens PE=2 SV=1	100294	49	0.07	2(1)
B4DDF9	B4DDF9_HUMAN Annexin OS=Homo sapiens GN=ANXA4 PE=2 SV=1	27274	49	0.26	2(0)
B4DFF1	B4DFF1_HUMAN cDNA FLJ53312, highly similar to Heterogeneous nuclear ribonucleoprotein K OS=Homo sapiens PE=2 SV=1	50968	49	0.06	3(1)
B4DND6	B4DND6_HUMAN cDNA FLJ55804, highly similar to COP9 signalosome complex subunit 1 OS=Homo sapiens PE=2 SV=1	55205	49	0.06	1(1)
J3KS13	J3KS13_HUMAN Clathrin heavy chain 1 OS=Homo sapiens GN=CLTC PE=4 SV=1	71121	49	0.05	1(1)
L0R849	L0R849_HUMAN Enolase OS=Homo sapiens GN=EDARADD PE=3 SV=1	42657	49	0.16	2(1)
Q5SRT3	Q5SRT3_HUMAN Chloride intracellular channel 1, isoform CRA_a OS=Homo sapiens GN=CLIC1 PE=2 SV=2	27248	49	0.26	2(1)
Q5VU43	MYOME_HUMAN Myomegalin OS=Homo sapiens GN=PDE4DIP PE=1 SV=1	266343	49	0.01	2(2)
Q6EHZ3	Q6EHZ3_HUMAN Putative uncharacterized protein STRF8 OS=Homo sapiens GN=STRF8 PE=2 SV=1	41361	49	0.08	1(1)
G9K388	G9K388_HUMAN YWHAE/FAM22A fusion protein (Fragment) OS=Homo sapiens GN=YWHAE/FAM22A fusion PE=2 SV=1	41540	48	0.17	2(1)
A8K8U1	A8K8U1_HUMAN cDNA FLJ77762, highly similar to Homo sapiens cullin-associated and neddylation-dissociated 1 (CAND1), mRNA OS=Homo sapiens PE=2 SV=1	137941	47	0.02	1(1)
B2R4K7	B2R4K7_HUMAN 60S ribosomal protein L6 OS=Homo sapiens PE=2 SV=1	32739	47	0.1	1(1)
B7Z3V1	B7Z3V1_HUMAN cDNA FLJ60077, highly similar to Sodium/potassium-transporting ATPase alpha-1 chain (EC 3.6.3.9) (Fragment) OS=Homo sapiens PE=2 SV=1	113791	47	0.06	3(1)
P26038	MOES_HUMAN Moesin OS=Homo sapiens GN=MSN PE=1 SV=3	67892	47	0.15	3(1)
Q08211	DHX9_HUMAN ATP-dependent RNA helicase A OS=Homo sapiens GN=DHX9 PE=1 SV=4	142181	47	0.02	2(1)
B2R4P9	B2R4P9_HUMAN Histone H3 OS=Homo sapiens GN=H3F3B PE=2 SV=1	15376	46	0.22	2(1)
D3DXI9	D3DXI9_HUMAN Polymerase (DNA directed), epsilon, isoform CRA_a OS=Homo sapiens GN=POLE PE=2 SV=1	209711	46	0.02	1(1)
E5KNY5	E5KNY5_HUMAN Leucine-rich PPR-motif containing OS=Homo sapiens GN=LRPPRC PE=2 SV=1	159003	46	0.06	5(0)
H0YGW7	H0YGW7_HUMAN ATP-binding cassette sub-family F member 1 (Fragment) OS=Homo sapiens GN=ABCF1 PE=3 SV=1	68075	46	0.05	1(1)
Q0VGD6	Q0VGD6_HUMAN HNRPR protein (Fragment) OS=Homo sapiens GN=HNRPR PE=2 SV=1	68218	46	0.05	1(1)
B4DE91	B4DE91_HUMAN cDNA FLJ55534, highly similar to 4-trimethylaminobutyraldehyde dehydrogenase (EC 1.2.1.47) OS=Homo sapiens PE=2 SV=1	53648	45	0.13	3(1)
B4DVB8	B4DVB8_HUMAN ELAV-like protein 1 OS=Homo sapiens GN=ELAVL1 PE=2 SV=1	39200	45	0.08	1(1)
H0YBN4	H0YBN4_HUMAN Polyadenylate-binding protein 1 (Fragment) OS=Homo sapiens GN=PABPC1 PE=4 SV=1	19868	45	0.17	1(1)
H0YES2	H0YES2_HUMAN DEP domain-containing protein 1A (Fragment) OS=Homo sapiens GN=DEPDC1 PE=4 SV=1	36209	45	0.09	2(1)
K7EJT5	K7EJT5_HUMAN 60S ribosomal protein L22 (Fragment) OS=Homo sapiens GN=RPL22 PE=4 SV=1	5080	45	1.94	2(1)
L0R6M5	L0R6M5_HUMAN Alternative protein PRDM5 OS=Homo sapiens GN=PRDM5 PE=4 SV=1	5011	45	0.81	1(0)
O60701	UGDH_HUMAN UDP-glucose 6-dehydrogenase OS=Homo sapiens GN=UGDH PE=1 SV=1	55674	45	0.12	2(1)
Q53T09	Q53T09_HUMAN Putative uncharacterized protein XRCC5 (Fragment) OS=Homo sapiens GN=XRCC5 PE=2 SV=1	64659	45	0.1	2(0)
Q5XJ04	Q5XJ04_HUMAN 3-hydroxy-3-methylglutaryl-Coenzyme A synthase 1 (Soluble) OS=Homo sapiens GN=HMGCS1 PE=2 SV=1	57854	45	0.06	1(1)
B2RBV7	B2RBV7_HUMAN cDNA, FLJ95721, highly similar to Homo sapiens cullin 4A (CUL4A), mRNA OS=Homo sapiens PE=2 SV=1	77212	44	0.04	2(1)
B7Z2F4	B7Z2F4_HUMAN T-complex protein 1 subunit delta OS=Homo sapiens GN=CCT4 PE=2 SV=1	42729	44	0.08	1(1)
E9PKZ0	E9PKZ0_HUMAN 60S ribosomal protein L8 (Fragment) OS=Homo sapiens GN=RPL8 PE=2 SV=1	22603	44	0.32	2(0)
G3V1V0	G3V1V0_HUMAN Myosin light polypeptide 6 OS=Homo sapiens GN=MYL6 PE=2 SV=1	18311	44	0.18	1(1)
Q0D2Q6	Q0D2Q6_HUMAN Phosphoglycerate mutase 1 (Brain) OS=Homo sapiens GN=PGAM1 PE=2 SV=1	28888	44	0.12	1(1)
Q0QET7	Q0QET7_HUMAN Glyceraldehyde-3-phosphate dehydrogenase (Fragment) OS=Homo sapiens GN=GAPDH PE=2 SV=1	24776	44	0.14	1(1)
A6NG51	A6NG51_HUMAN Spectrin alpha chain, non-erythrocytic 1 OS=Homo sapiens GN=SPTAN1 PE=2 SV=2	285628	43	0.03	3(0)
A8K2Y2	A8K2Y2_HUMAN cDNA FLJ78120, highly similar to Homo sapiens eukaryotic translation initiation factor 2, subunit 3 gamma, 52kDa (EIF2S3), mRNA OS=Homo sapiens PE=2 SV=1	51648	43	0.06	1(1)
B4DDF3	B4DDF3_HUMAN cDNA FLJ58050, highly similar to Interleukin enhancer-binding factor 3 OS=Homo sapiens PE=2 SV=1	30010	43	0.23	2(0)
B4DKS8	B4DKS8_HUMAN cDNA FLJ57121, highly similar to Heterogeneous nuclear ribonucleoprotein F OS=Homo sapiens PE=2 SV=1	37460	43	0.18	2(0)
B7Z5E2	B7Z5E2_HUMAN 26S protease regulatory subunit 7 OS=Homo sapiens GN=PSMC2 PE=2 SV=1	33594	43	0.1	1(1)
O14980	XPO1_HUMAN Exportin-1 OS=Homo sapiens GN=XPO1 PE=1 SV=1	124447	43	0.11	4(1)
P62269	RS18_HUMAN 40S ribosomal protein S18 OS=Homo sapiens GN=RPS18 PE=1 SV=3	17708	43	0.19	1(1)
B3KUJ2	B3KUJ2_HUMAN cDNA FLJ40024 fis, clone STOMA2007745, highly similar to UBIQUITIN-ACTIVATING ENZYME E1 OS=Homo sapiens PE=2 SV=1	57490	42	0.06	1(1)
F2Z2D0	F2Z2D0_HUMAN Nuclear pore complex protein Nup205 OS=Homo sapiens GN=NUP205 PE=2 SV=1	23590	42	0.14	1(1)
F8WE72	F8WE72_HUMAN Ribosome maturation protein SBDS OS=Homo sapiens GN=SBDS PE=2 SV=1	9820	42	0.36	1(1)
P62263	RS14_HUMAN 40S ribosomal protein S14 OS=Homo sapiens GN=RPS14 PE=1 SV=3	16434	42	0.21	1(1)
Q96IF9	Q96IF9_HUMAN VCP protein (Fragment) OS=Homo sapiens GN=VCP PE=2 SV=2	71534	42	0.09	2(1)
B4DGX3	B4DGX3_HUMAN Phosphoribosylaminoimidazole-succinocarboxamide synthase OS=Homo sapiens PE=2 SV=1	31934	41	0.1	2(1)
B4DM31	B4DM31_HUMAN cDNA FLJ54022, highly similar to Exportin-2 OS=Homo sapiens PE=2 SV=1	86605	41	0.04	3(1)
B4DR45	B4DR45_HUMAN cDNA FLJ61339, highly similar to Alanyl-tRNA synthetase (EC 6.1.1.7) OS=Homo sapiens PE=2 SV=1	110017	41	0.03	1(1)
B7ZML4	B7ZML4_HUMAN PLA2R1 protein OS=Homo sapiens GN=PLA2R1 PE=2 SV=1	171571	41	0.02	5(2)
H7C0R7	H7C0R7_HUMAN NADH-cytochrome b5 reductase 1 (Fragment) OS=Homo sapiens GN=CYB5R1 PE=4 SV=1	25060	41	0.13	1(1)
O43707	ACTN4_HUMAN Alpha-actinin-4 OS=Homo sapiens GN=ACTN4 PE=1 SV=2	105245	41	0.06	4(0)
P16152	CBR1_HUMAN Carbonyl reductase [NADPH] 1 OS=Homo sapiens GN=CBR1 PE=1 SV=3	30641	41	0.23	2(0)
B2R5V2	B2R5V2_HUMAN Succinyl-CoA:3-ketoacid-coenzyme A transferase OS=Homo sapiens PE=2 SV=1	56520	40	0.06	1(1)
F2Z3C0	F2Z3C0_HUMAN 40S ribosomal protein S9 OS=Homo sapiens GN=RPS9 PE=2 SV=1	9255	40	0.38	1(1)
H0Y804	H0Y804_HUMAN Aldo-keto reductase family 1 member C1 (Fragment) OS=Homo sapiens GN=AKR1C1 PE=4 SV=1	28617	40	0.25	2(1)
H7C5W9	H7C5W9_HUMAN Sarcoplasmic/endoplasmic reticulum calcium ATPase 2 (Fragment) OS=Homo sapiens GN=ATP2A2 PE=3 SV=1	104121	40	0.03	1(1)
M0QX85	M0QX85_HUMAN Nitric oxide synthase-interacting protein (Fragment) OS=Homo sapiens GN=NOSIP PE=4 SV=1	11349	40	0.3	1(1)
P14923	PLAK_HUMAN Junction plakoglobin OS=Homo sapiens GN=JUP PE=1 SV=3	82434	40	0.08	2(0)
P17987	TCPA_HUMAN T-complex protein 1 subunit alpha OS=Homo sapiens GN=TCP1 PE=1 SV=1	60819	40	0.11	2(0)
P24752	THIL_HUMAN Acetyl-CoA acetyltransferase, mitochondrial OS=Homo sapiens GN=ACAT1 PE=1 SV=1	45456	40	0.07	1(1)
Q15645	PCH2_HUMAN Pachytene checkpoint protein 2 homolog OS=Homo sapiens GN=TRIP13 PE=1 SV=2	48863	40	0.07	1(1)
Q2XPP3	Q2XPP3_HUMAN Type II 3a-hydroxysteroid dehydrogenase variant OS=Homo sapiens PE=2 SV=1	37201	40	0.09	1(1)
Q6XQN6	PNCB_HUMAN Nicotinate phosphoribosyltransferase OS=Homo sapiens GN=NAPRT1 PE=1 SV=2	58112	40	0.06	1(1)
B2RAQ8	B2RAQ8_HUMAN cDNA, FLJ95058, highly similar to Homo sapiens carnitine palmitoyltransferase 1A (liver) (CPT1A),nuclear gene encoding mitochondrial protein, mRNA OS=Homo sapiens PE=2 SV=1	88967	39	0.04	1(1)
B2ZZ89	B2ZZ89_HUMAN Spectrin beta non-erythrocytic 1 OS=Homo sapiens GN=SPTBN1 PE=2 SV=1	275237	39	0.02	3(0)
H0YCK7	H0YCK7_HUMAN Elongation factor 1-delta (Fragment) OS=Homo sapiens GN=EEF1D PE=4 SV=1	23105	39	0.15	1(0)
H0YDK7	H0YDK7_HUMAN Ras-related protein Rab-30 (Fragment) OS=Homo sapiens GN=RAB30 PE=2 SV=1	19580	39	0.17	1(1)
H0YGL6	H0YGL6_HUMAN Ras-related protein Rab-6A (Fragment) OS=Homo sapiens GN=RAB6A PE=3 SV=1	22860	39	0.15	1(1)
J3QSF4	J3QSF4_HUMAN Ras-related protein Rab-15 (Fragment) OS=Homo sapiens GN=RAB15 PE=4 SV=1	15796	39	0.22	1(1)
Q2NL95	Q2NL95_HUMAN DDX19B protein (Fragment) OS=Homo sapiens GN=DDX19B PE=2 SV=1	51068	39	0.06	2(1)
Q2TU64	Q2TU64_HUMAN PIG48 OS=Homo sapiens PE=2 SV=1	61110	39	0.11	4(0)
Q5U602	Q5U602_HUMAN RAB33B, member RAS oncogene family OS=Homo sapiens GN=RAB33B PE=2 SV=1	26024	39	0.13	1(1)
Q8NCM2	KCNH5_HUMAN Potassium voltage-gated channel subfamily H member 5 OS=Homo sapiens GN=KCNH5 PE=1 SV=3	112946	39	0.03	1(1)
B3KUZ8	B3KUZ8_HUMAN Aspartate aminotransferase OS=Homo sapiens PE=2 SV=1	41699	38	0.16	2(0)
B4E0S6	B4E0S6_HUMAN cDNA FLJ55635, highly similar to pre-mRNA-splicing factorATP-dependent RNA helicase DHX15 (EC 3.6.1.-) OS=Homo sapiens PE=2 SV=1	90289	38	0.07	2(0)
B5MCT8	B5MCT8_HUMAN 40S ribosomal protein S9 OS=Homo sapiens GN=RPS9 PE=2 SV=1	16674	38	0.45	2(1)
B7Z1R5	B7Z1R5_HUMAN V-type proton ATPase catalytic subunit A OS=Homo sapiens GN=ATP6V1A PE=2 SV=1	65037	38	0.05	1(1)
H0YCK3	H0YCK3_HUMAN Double-stranded RNA-specific adenosine deaminase (Fragment) OS=Homo sapiens GN=ADAR PE=2 SV=1	133761	38	0.02	1(0)
H3BNV2	H3BNV2_HUMAN NAD(P)H dehydrogenase [quinone] 1 OS=Homo sapiens GN=NQO1 PE=2 SV=1	28533	38	0.12	1(0)
M0QYS1	M0QYS1_HUMAN 60S ribosomal protein L13a (Fragment) OS=Homo sapiens GN=RPL13A PE=4 SV=1	23919	38	0.14	1(1)
Q3LIE7	Q3LIE7_HUMAN Putative uncharacterized protein Nbla03646 OS=Homo sapiens GN=Nbla03646 PE=2 SV=1	50031	38	0.07	1(0)
Q6FHP5	Q6FHP5_HUMAN PHB protein (Fragment) OS=Homo sapiens GN=PHB PE=2 SV=1	29871	38	0.11	2(0)
Q8N274	Q8N274_HUMAN cDNA FLJ33834 fis, clone CTONG2004264, moderately similar to NEUROBLAST DIFFERENTIATION ASSOCIATED PROTEIN AHNAK OS=Homo sapiens PE=2 SV=1	86111	38	0.04	1(1)
B2R806	B2R806_HUMAN Eukaryotic translation initiation factor 3 subunit E OS=Homo sapiens GN=EIF3E PE=2 SV=1	52622	37	0.06	2(1)
B4DQJ8	B4DQJ8_HUMAN 6-phosphogluconate dehydrogenase, decarboxylating OS=Homo sapiens GN=PGD PE=2 SV=1	52352	37	0.13	2(0)
C9JAK5	C9JAK5_HUMAN ADP-ribosylation factor 4 OS=Homo sapiens GN=ARF4 PE=2 SV=1	17802	37	0.19	1(0)
H3BPV7	H3BPV7_HUMAN Lysine--tRNA ligase (Fragment) OS=Homo sapiens GN=KARS PE=2 SV=1	12352	37	0.28	1(1)
Q0D2M2	Q0D2M2_HUMAN HIST1H2BC protein OS=Homo sapiens GN=HIST1H2BC PE=2 SV=1	13826	37	0.55	4(1)
Q5T1D1	Q5T1D1_HUMAN Ribosomal protein L29 (RPL29) pseudogene OS=Homo sapiens GN=RP11-632C17__A.1-001 PE=4 SV=2	17471	37	0.19	1(0)
Q68E01	INT3_HUMAN Integrator complex subunit 3 OS=Homo sapiens GN=INTS3 PE=1 SV=1	119533	37	0.03	1(0)
Q6FI97	Q6FI97_HUMAN BAF53A protein OS=Homo sapiens GN=BAF53A PE=2 SV=1	47864	37	0.14	2(0)
Q9H072	Q9H072_HUMAN Putative uncharacterized protein DKFZp586J151 OS=Homo sapiens GN=DKFZp586J151 PE=2 SV=1	58686	37	0.06	1(1)
Q9NZ23	Q9NZ23_HUMAN Drug-sensitive protein 1 OS=Homo sapiens GN=YA61 PE=2 SV=1	14858	37	0.23	1(0)
A4QPB0	A4QPB0_HUMAN IQ motif containing GTPase activating protein 1 OS=Homo sapiens GN=IQGAP1 PE=2 SV=1	189789	36	0.03	3(0)
B1AHB0	B1AHB0_HUMAN MCM5 minichromosome maintenance deficient 5, cell division cycle 46 (S. cerevisiae), isoform CRA_a OS=Homo sapiens GN=MCM5 PE=2 SV=1	83031	36	0.04	1(0)
B3KQW0	B3KQW0_HUMAN cDNA FLJ33177 fis, clone ADRGL2002679, highly similar to Methyl-CpG-binding domain protein 5 OS=Homo sapiens PE=2 SV=1	82166	36	0.04	1(0)
D3DTL4	D3DTL4_HUMAN Enolase OS=Homo sapiens GN=ENO3 PE=2 SV=1	37167	36	0.19	2(0)
H0YHA7	H0YHA7_HUMAN 60S ribosomal protein L18 (Fragment) OS=Homo sapiens GN=RPL18 PE=3 SV=1	19134	36	0.18	1(1)
K7EIR0	K7EIR0_HUMAN WD repeat-containing protein 18 OS=Homo sapiens GN=WDR18 PE=4 SV=1	45436	36	0.07	1(0)
Q0QF37	Q0QF37_HUMAN Malate dehydrogenase (Fragment) OS=Homo sapiens GN=MDH2 PE=2 SV=1	32405	36	0.1	1(0)
B2RU06	B2RU06_HUMAN EIF4G1 protein OS=Homo sapiens GN=EIF4G1 PE=2 SV=1	176807	35	0.02	1(0)
E2DRY6	E2DRY6_HUMAN Enolase OS=Homo sapiens PE=2 SV=1	36874	35	0.29	3(0)
H0Y8G5	H0Y8G5_HUMAN Heterogeneous nuclear ribonucleoprotein D0 (Fragment) OS=Homo sapiens GN=HNRNPD PE=2 SV=1	29877	35	0.11	1(0)
H0YH81	H0YH81_HUMAN ATP synthase subunit beta (Fragment) OS=Homo sapiens GN=ATP5B PE=3 SV=1	38226	35	0.09	1(0)
Q9H9B4	SFXN1_HUMAN Sideroflexin-1 OS=Homo sapiens GN=SFXN1 PE=1 SV=4	35881	35	0.09	1(0)
B1ANK7	B1ANK7_HUMAN Fumarate hydratase, isoform CRA_c OS=Homo sapiens GN=FH PE=2 SV=1	54773	34	0.06	1(0)
B2R659	B2R659_HUMAN cDNA, FLJ92803, highly similar to Homo sapiens hydroxysteroid (17-beta) dehydrogenase 4 (HSD17B4), mRNA OS=Homo sapiens PE=2 SV=1	80018	34	0.04	1(0)
B2R8N0	B2R8N0_HUMAN cDNA, FLJ93975, highly similar to Homo sapiens epoxide hydrolase 1, microsomal (xenobiotic) (EPHX1), mRNA OS=Homo sapiens PE=2 SV=1	53129	34	0.2	4(0)
B3KM77	B3KM77_HUMAN cDNA FLJ10435 fis, clone NT2RP1000493, highly similar to Splicing factor 3B subunit 3 OS=Homo sapiens PE=2 SV=1	56736	34	0.06	1(1)
P62851	RS25_HUMAN 40S ribosomal protein S25 OS=Homo sapiens GN=RPS25 PE=1 SV=1	13791	34	0.25	1(0)
A1A508	A1A508_HUMAN PRSS3 protein OS=Homo sapiens GN=PRSS3 PE=2 SV=1	27040	33	0.26	2(0)
G3V359	G3V359_HUMAN DNA-(apurinic or apyrimidinic site) lyase (Fragment) OS=Homo sapiens GN=APEX1 PE=2 SV=1	19384	33	0.17	1(0)
H0YIZ0	H0YIZ0_HUMAN Serine hydroxymethyltransferase (Fragment) OS=Homo sapiens GN=SHMT2 PE=3 SV=1	28971	33	0.11	1(0)
H0YJX6	H0YJX6_HUMAN Protein arginine N-methyltransferase 5 (Fragment) OS=Homo sapiens GN=PRMT5 PE=2 SV=1	32462	33	0.1	1(0)
H0YN26	H0YN26_HUMAN Acidic leucine-rich nuclear phosphoprotein 32 family member A OS=Homo sapiens GN=ANP32A PE=2 SV=1	20099	33	0.17	1(0)
Q3B7A7	Q3B7A7_HUMAN Phosphoribosylglycinamide formyltransferase, phosphoribosylglycinamide synthetase, phosphoribosylaminoimidazole synthetase OS=Homo sapiens GN=GART PE=2 SV=1	108909	33	0.03	1(0)
B2R983	B2R983_HUMAN cDNA, FLJ94267, highly similar to Homo sapiens glutathione S-transferase omega 1 (GSTO1), mRNA OS=Homo sapiens PE=2 SV=1	27806	32	0.12	2(0)
B4DIW2	B4DIW2_HUMAN cDNA FLJ54035, highly similar to Neutral alpha-glucosidase AB OS=Homo sapiens PE=2 SV=1	94218	32	0.03	1(0)
F5GWU8	F5GWU8_HUMAN Ras-related protein Rap-1b (Fragment) OS=Homo sapiens GN=RAP1B PE=2 SV=1	9772	32	0.36	1(0)
M0R019	M0R019_HUMAN Heterogeneous nuclear ribonucleoprotein M (Fragment) OS=Homo sapiens GN=HNRNPM PE=4 SV=1	37717	32	0.09	1(0)
Q05DH1	Q05DH1_HUMAN Proteasome subunit alpha type (Fragment) OS=Homo sapiens GN=PSMA7 PE=2 SV=1	26868	32	0.26	2(0)
A5YM44	A5YM44_HUMAN APAF1 protein OS=Homo sapiens GN=APAF1 PE=2 SV=1	139198	31	0.02	5(3)
A6NLN1	A6NLN1_HUMAN Polypyrimidine tract binding protein 1, isoform CRA_e OS=Homo sapiens GN=PTBP1 PE=2 SV=3	21899	31	0.33	2(0)
A8MUD9	A8MUD9_HUMAN 60S ribosomal protein L7 OS=Homo sapiens GN=RPL7 PE=2 SV=1	24474	31	0.14	5(1)
B0V043	B0V043_HUMAN Valine--tRNA ligase OS=Homo sapiens GN=VARS PE=2 SV=1	141632	31	0.02	2(0)
B2MV14	B2MV14_HUMAN Truncated lactoferrin OS=Homo sapiens GN=LTF PE=4 SV=1	65675	31	0.05	1(0)
B4DIG4	B4DIG4_HUMAN cDNA FLJ57115, highly similar to 39S ribosomal protein L19, mitochondrial OS=Homo sapiens PE=2 SV=1	22952	31	0.15	1(0)
B4DNM8	B4DNM8_HUMAN cDNA FLJ53395, highly similar to Prolyl 3-hydroxylase 1 (EC 1.14.11.7) OS=Homo sapiens PE=2 SV=1	69572	31	0.05	1(0)
B4DRF6	B4DRF6_HUMAN cDNA FLJ51591, highly similar to DNA replication licensing factor MCM6 (Fragment) OS=Homo sapiens PE=2 SV=1	49988	31	0.07	1(0)
I6L957	I6L957_HUMAN HNRNPA2B1 protein OS=Homo sapiens GN=HNRNPA2B1 PE=2 SV=1	28451	31	0.12	2(0)
O00232	PSD12_HUMAN 26S proteasome non-ATPase regulatory subunit 12 OS=Homo sapiens GN=PSMD12 PE=1 SV=3	53270	31	0.13	3(0)
P30041	PRDX6_HUMAN Peroxiredoxin-6 OS=Homo sapiens GN=PRDX6 PE=1 SV=3	25133	31	0.13	1(0)
Q2F838	Q2F838_HUMAN Eukaryotic translation elongation factor 1 gamma (Fragment) OS=Homo sapiens PE=2 SV=1	9682	31	0.36	1(0)
Q53F60	Q53F60_HUMAN Carbonyl reductase 3 variant (Fragment) OS=Homo sapiens PE=2 SV=1	31248	31	0.11	1(0)
Q5JR94	Q5JR94_HUMAN 40S ribosomal protein S8 OS=Homo sapiens GN=RPS8 PE=2 SV=1	24475	31	0.14	1(0)
A8K2M0	A8K2M0_HUMAN Proteasome (Prosome, macropain) 26S subunit, ATPase, 4, isoform CRA_b OS=Homo sapiens GN=PSMC4 PE=2 SV=1	47451	30	0.07	1(0)
F5H1Y3	F5H1Y3_HUMAN Flap endonuclease 1 (Fragment) OS=Homo sapiens GN=FEN1 PE=2 SV=1	18377	30	0.18	1(0)
G3V1S6	G3V1S6_HUMAN Polypeptide N-acetylgalactosaminyltransferase 2 soluble form OS=Homo sapiens GN=GALNT2 PE=2 SV=1	61440	30	0.05	1(0)
J3QL38	J3QL38_HUMAN Tripartite motif-containing protein 16 (Fragment) OS=Homo sapiens GN=TRIM16 PE=4 SV=1	10903	30	0.32	1(0)
K0A7K7	K0A7K7_HUMAN TNF receptor-associated protein 1 (Fragment) OS=Homo sapiens GN=TRAP1 PE=2 SV=1	77165	30	0.04	2(0)
O95363	SYFM_HUMAN Phenylalanine--tRNA ligase, mitochondrial OS=Homo sapiens GN=FARS2 PE=1 SV=1	52666	30	0.06	3(0)
Q5T8U2	Q5T8U2_HUMAN 60S ribosomal protein L7a OS=Homo sapiens GN=RPL7A PE=2 SV=1	16700	30	0.2	1(0)
Q9UM11-2	FZR_HUMAN Isoform 2 of Fizzy-related protein homolog OS=Homo sapiens GN=FZR1	55131	30	0.06	1(0)
B3KPA6	B3KPA6_HUMAN Acyl-Coenzyme A dehydrogenase, very long chain, isoform CRA_e OS=Homo sapiens GN=ACADVL PE=2 SV=1	62941	29	0.11	2(0)
B4DP57	B4DP57_HUMAN Nucleoporin NUP53 OS=Homo sapiens GN=NUP35 PE=2 SV=1	21243	29	0.16	1(0)
F2Z393	F2Z393_HUMAN Transaldolase OS=Homo sapiens GN=TALDO1 PE=2 SV=1	35535	29	0.09	2(0)
G3V1A4	G3V1A4_HUMAN Cofilin 1 (Non-muscle), isoform CRA_a OS=Homo sapiens GN=CFL1 PE=2 SV=1	17029	29	0.2	1(0)
B0S8A9	B0S8A9_HUMAN Flotillin-1 (Fragment) OS=Homo sapiens GN=FLOT1 PE=2 SV=1	20479	28	0.16	2(0)
B1Q3L0	B1Q3L0_HUMAN Tripartite motif-containing protein 5 alpha OS=Homo sapiens GN=TRIM5 PE=2 SV=1	57471	28	0.06	1(0)
B2R491	B2R491_HUMAN Ribosomal protein S4, X-linked, isoform CRA_c OS=Homo sapiens GN=RPS4X PE=2 SV=1	29807	28	0.11	1(0)
F5H0G1	F5H0G1_HUMAN Filensin OS=Homo sapiens GN=BFSP1 PE=2 SV=1	58704	28	0.06	3(0)
J3KPF3	J3KPF3_HUMAN 4F2 cell-surface antigen heavy chain OS=Homo sapiens GN=SLC3A2 PE=4 SV=1	68230	28	0.05	1(0)
Q0IJ56	Q0IJ56_HUMAN ST13 protein (Fragment) OS=Homo sapiens GN=ST13 PE=2 SV=1	35164	28	0.09	2(0)
A8K6V7	A8K6V7_HUMAN cDNA FLJ76053, highly similar to Homo sapiens Ras-GTPase activating protein SH3 domain-binding protein 2 (G3BP2), transcript variant 3, mRNA OS=Homo sapiens PE=2 SV=1	50842	27	0.06	1(0)
B4DE36	B4DE36_HUMAN Glucose-6-phosphate isomerase OS=Homo sapiens PE=2 SV=1	60376	27	0.05	1(0)
H0YC04	H0YC04_HUMAN V-type proton ATPase subunit B, brain isoform (Fragment) OS=Homo sapiens GN=ATP6V1B2 PE=4 SV=1	21215	27	0.16	1(0)
K7ESD3	K7ESD3_HUMAN Zinc finger and SCAN domain-containing protein 5B (Fragment) OS=Homo sapiens GN=ZSCAN5B PE=4 SV=2	15986	27	0.21	2(0)
P51795-2	CLCN5_HUMAN Isoform 2 of H(+)/Cl(-) exchange transporter 5 OS=Homo sapiens GN=CLCN5	91696	27	0.04	1(0)
Q14204	DYHC1_HUMAN Cytoplasmic dynein 1 heavy chain 1 OS=Homo sapiens GN=DYNC1H1 PE=1 SV=5	534809	27	0.01	1(1)
Q4VY19	Q4VY19_HUMAN 14-3-3 protein beta/alpha (Fragment) OS=Homo sapiens GN=YWHAB PE=2 SV=1	11599	27	0.3	3(0)
Q65ZQ3	Q65ZQ3_HUMAN FBRNP OS=Homo sapiens GN=D10S102 PE=2 SV=1	29623	27	0.24	2(0)
Q6IBS5	Q6IBS5_HUMAN DLST protein OS=Homo sapiens GN=DLST PE=2 SV=1	49131	27	0.07	2(1)
Q9C0D2	K1731_HUMAN Centrosomal protein KIAA1731 OS=Homo sapiens GN=KIAA1731 PE=2 SV=4	296535	27	0.01	1(0)
A6NKX1	F223B_HUMAN Protein FAM223B OS=Homo sapiens GN=FAM223B PE=3 SV=1	13997	26	0.25	4(1)
B2R4P2	B2R4P2_HUMAN cDNA, FLJ92164, highly similar to Homo sapiens peroxiredoxin 1 (PRDX1), mRNA OS=Homo sapiens PE=2 SV=1	22414	26	0.15	2(0)
B2RAN1	B2RAN1_HUMAN cDNA, FLJ95012, highly similar to Homo sapiens UDP-glucose pyrophosphorylase 2 (UGP2), mRNA OS=Homo sapiens PE=2 SV=1	57042	26	0.06	1(0)
B3KSQ7	B3KSQ7_HUMAN Drebrin 1, isoform CRA_d OS=Homo sapiens GN=DBN1 PE=2 SV=1	66053	26	0.05	1(0)
B4DGP8	B4DGP8_HUMAN Calnexin OS=Homo sapiens GN=CANX PE=2 SV=1	71971	26	0.05	1(0)
B4E3V2	B4E3V2_HUMAN cDNA FLJ52854, highly similar to Sequestosome-1 OS=Homo sapiens PE=2 SV=1	31979	26	0.1	1(0)
E0Z3F0	E0Z3F0_HUMAN DUX4 OS=Homo sapiens GN=DUX4 PE=3 SV=1	45252	26	0.07	1(0)
H3BNQ7	H3BNQ7_HUMAN 4-aminobutyrate aminotransferase, mitochondrial OS=Homo sapiens GN=ABAT PE=2 SV=1	58741	26	0.06	2(0)
M0R261	M0R261_HUMAN 6-phosphogluconolactonase (Fragment) OS=Homo sapiens GN=PGLS PE=4 SV=1	23210	26	0.14	1(0)
Q5MK14	Q5MK14_HUMAN Leukemia-associated protein (Fragment) OS=Homo sapiens PE=2 SV=1	7146	26	0.5	1(0)
Q8NDX1	PSD4_HUMAN PH and SEC7 domain-containing protein 4 OS=Homo sapiens GN=PSD4 PE=1 SV=2	117317	26	0.03	2(0)
B4DI28	B4DI28_HUMAN Polypyrimidine tract-binding protein 2 OS=Homo sapiens GN=PTBP2 PE=2 SV=1	34947	25	0.09	1(0)
B4DX35	B4DX35_HUMAN cDNA FLJ56540 OS=Homo sapiens PE=2 SV=1	56351	25	0.06	1(0)
D6RA82	D6RA82_HUMAN Annexin OS=Homo sapiens GN=ANXA3 PE=2 SV=1	32270	25	0.1	1(0)
G3V480	G3V480_HUMAN Signal recognition particle 54 kDa protein (Fragment) OS=Homo sapiens GN=SRP54 PE=2 SV=1	8221	25	0.43	1(0)
K7EJ44	K7EJ44_HUMAN Profilin 1, isoform CRA_b OS=Homo sapiens GN=PFN1 PE=4 SV=1	11497	25	0.3	1(0)
Q14329	Q14329_HUMAN Farnesyl pyrophosphate synthetase like-4 protein (Fragment) OS=Homo sapiens PE=3 SV=1	40038	25	0.08	1(0)
Q53G91	Q53G91_HUMAN Solute carrier family 16, member 3 variant (Fragment) OS=Homo sapiens PE=2 SV=1	50078	25	0.07	1(0)
Q9BRX5	PSF3_HUMAN DNA replication complex GINS protein PSF3 OS=Homo sapiens GN=GINS3 PE=1 SV=1	24576	25	0.14	1(0)
A0AUH1	A0AUH1_HUMAN Aberrant LSLCL OS=Homo sapiens PE=2 SV=1	33536	24	0.1	2(0)
B2RB23	B2RB23_HUMAN cDNA, FLJ95265, highly similar to Homo sapiens acetyl-Coenzyme A acyltransferase 2 (mitochondrial 3-oxoacyl-Coenzyme A thiolase) (ACAA2), nuclear gene encoding mitochondrial protein, mRNA OS=Homo sapiens PE=2 SV=1	42439	24	0.08	2(0)
B3KSC3	B3KSC3_HUMAN cDNA FLJ35987 fis, clone TESTI2014269, highly similar to D-3-phosphoglycerate dehydrogenase (EC 1.1.1.95) OS=Homo sapiens PE=2 SV=1	53607	24	0.06	1(0)
B4DKX6	B4DKX6_HUMAN cDNA FLJ53584, highly similar to Desmoplakin (Fragment) OS=Homo sapiens PE=2 SV=1	113281	24	0.03	1(0)
B4DWS9	B4DWS9_HUMAN cDNA FLJ57640, highly similar to Serpin B5 OS=Homo sapiens PE=2 SV=1	32839	24	0.1	1(0)
B5MCX3	B5MCX3_HUMAN Septin-2 OS=Homo sapiens GN=SEPT2 PE=2 SV=1	37145	24	0.09	1(1)
E9PRV3	E9PRV3_HUMAN WD repeat-containing protein 65 (Fragment) OS=Homo sapiens GN=WDR65 PE=2 SV=1	19226	24	0.18	1(0)
I3L0N3	I3L0N3_HUMAN Vesicle-fusing ATPase OS=Homo sapiens GN=NSF PE=2 SV=1	82553	24	0.04	1(0)
P13010	XRCC5_HUMAN X-ray repair cross-complementing protein 5 OS=Homo sapiens GN=XRCC5 PE=1 SV=3	83222	24	0.08	2(0)
Q5T081	Q5T081_HUMAN CHC1 protein OS=Homo sapiens GN=RCC1 PE=2 SV=1	45397	24	0.07	1(0)
Q6NZ55	Q6NZ55_HUMAN 60S ribosomal protein L13 OS=Homo sapiens GN=RPL13 PE=2 SV=1	24308	24	0.14	2(0)
Q6ZMX3	Q6ZMX3_HUMAN cDNA FLJ16614 fis, clone TESTI4013365 OS=Homo sapiens PE=2 SV=1	70224	24	0.05	1(0)
B3KTA3	B3KTA3_HUMAN Fascin OS=Homo sapiens PE=2 SV=1	52814	23	0.06	1(0)
B3KY12	B3KY12_HUMAN cDNA FLJ46581 fis, clone THYMU3043200, highly similar to Splicing factor 3A subunit 3 OS=Homo sapiens PE=2 SV=1	59082	23	0.06	1(0)
F5H740	F5H740_HUMAN Voltage-dependent anion-selective channel protein 3 OS=Homo sapiens GN=VDAC3 PE=2 SV=1	31080	23	0.11	1(0)
H0YCR7	H0YCR7_HUMAN Ribonuclease H1 (Fragment) OS=Homo sapiens GN=RNH1 PE=2 SV=1	31742	23	0.1	1(0)
L8E8G6	L8E8G6_HUMAN Alternative protein C6orf1 OS=Homo sapiens GN=C6orf1 PE=4 SV=1	9500	23	0.36	1(0)
Q96AG4	LRC59_HUMAN Leucine-rich repeat-containing protein 59 OS=Homo sapiens GN=LRRC59 PE=1 SV=1	35308	23	0.09	1(0)
Q9HB00	Q9HB00_HUMAN Desmocollin 1, isoform CRA_b OS=Homo sapiens GN=DSC1 PE=2 SV=1	94916	23	0.03	1(0)
Q9UKD2	MRT4_HUMAN mRNA turnover protein 4 homolog OS=Homo sapiens GN=MRTO4 PE=1 SV=2	27657	23	0.12	1(0)
B2R7E8	B2R7E8_HUMAN cDNA, FLJ93412, highly similar to Homo sapiens replication protein A2, 32kDa (RPA2), mRNA OS=Homo sapiens PE=2 SV=1	29358	22	0.11	1(0)
B3KM58	B3KM58_HUMAN cDNA FLJ10358 fis, clone NT2RM2001238, highly similar to Glutaminase kidney isoform, mitochondrial (Fragment) OS=Homo sapiens PE=2 SV=1	41736	22	0.08	1(0)
B4DFM0	B4DFM0_HUMAN Phenylalanine-tRNA synthetase-like, beta subunit, isoform CRA_c OS=Homo sapiens GN=FARSLB PE=2 SV=1	55353	22	0.06	1(0)
B4DGP6	B4DGP6_HUMAN cDNA FLJ53865, highly similar to Succinate semialdehyde dehydrogenase, mitochondrial (EC 1.2.1.24) OS=Homo sapiens PE=2 SV=1	48933	22	0.07	1(0)
B4DSN3	B4DSN3_HUMAN cDNA FLJ60345, highly similar to Protein transport protein Sec24C OS=Homo sapiens PE=2 SV=1	107974	22	0.03	1(0)
D6R9I9	D6R9I9_HUMAN ATP-binding cassette sub-family E member 1 OS=Homo sapiens GN=ABCE1 PE=2 SV=1	47919	22	0.07	1(0)
E9PCX2	E9PCX2_HUMAN Aldose reductase OS=Homo sapiens GN=AKR1B1 PE=2 SV=1	29768	22	0.11	1(0)
H3BRD9	H3BRD9_HUMAN Nuclear pore complex protein Nup93 (Fragment) OS=Homo sapiens GN=NUP93 PE=4 SV=1	15974	22	0.21	1(0)
H7C086	H7C086_HUMAN ATP synthase subunit O, mitochondrial (Fragment) OS=Homo sapiens GN=ATP5O PE=4 SV=1	8242	22	0.43	1(0)
J3KRB3	J3KRB3_HUMAN 60S ribosomal protein L17 (Fragment) OS=Homo sapiens GN=RPL17 PE=3 SV=1	12356	22	0.28	1(0)
M0R0I5	M0R0I5_HUMAN Far upstream element-binding protein 2 (Fragment) OS=Homo sapiens GN=KHSRP PE=4 SV=1	29495	22	0.11	2(0)
Q14676-3	MDC1_HUMAN Isoform 3 of Mediator of DNA damage checkpoint protein 1 OS=Homo sapiens GN=MDC1	197007	22	0.02	1(0)
Q8N7J3	Q8N7J3_HUMAN CDNA FLJ25476 fis, clone CBL03186 OS=Homo sapiens PE=2 SV=1	22942	22	0.15	1(0)
Q9BR63	Q9BR63_HUMAN FARSB protein (Fragment) OS=Homo sapiens GN=FARSB PE=2 SV=2	66287	22	0.05	1(0)
A4D1A8	A4D1A8_HUMAN Similar to Piccolo protein (Aczonin) OS=Homo sapiens GN=LOC392742 PE=4 SV=1	411650	21	0.01	4(0)
B4DGW3	B4DGW3_HUMAN cDNA FLJ54625, highly similar to ATP synthase subunit alpha, mitochondrial (EC 3.6.3.14) OS=Homo sapiens PE=2 SV=1	17690	21	0.19	1(0)
B4DKH7	B4DKH7_HUMAN Sorting nexin-11 OS=Homo sapiens GN=SNX11 PE=2 SV=1	23358	21	0.14	1(0)
B4DNA0	B4DNA0_HUMAN cDNA FLJ58027 OS=Homo sapiens PE=2 SV=1	47806	21	0.07	1(0)
D3DPF9	D3DPF9_HUMAN Titin, isoform CRA_b OS=Homo sapiens GN=TTN PE=4 SV=1	3011430	21	0	7(0)
E2QRI0	E2QRI0_HUMAN Uncharacterized protein OS=Homo sapiens PE=4 SV=1	49576	21	0.07	1(0)
E5RJ53	E5RJ53_HUMAN Uncharacterized protein C8orf74 OS=Homo sapiens GN=C8orf74 PE=2 SV=1	11456	21	0.3	2(0)
G3V1A1	G3V1A1_HUMAN 60S ribosomal protein L8 OS=Homo sapiens GN=RPL8 PE=2 SV=1	18329	21	0.18	1(0)
H0YEP8	H0YEP8_HUMAN Serpin H1 (Fragment) OS=Homo sapiens GN=SERPINH1 PE=3 SV=1	6605	21	0.54	1(0)
H0YK49	H0YK49_HUMAN Electron transfer flavoprotein subunit alpha, mitochondrial OS=Homo sapiens GN=ETFA PE=2 SV=1	24259	21	0.14	2(0)
J3KQ32	J3KQ32_HUMAN Obg-like ATPase 1 OS=Homo sapiens GN=OLA1 PE=4 SV=1	47136	21	0.07	1(0)
P62906	RL10A_HUMAN 60S ribosomal protein L10a OS=Homo sapiens GN=RPL10A PE=1 SV=2	24987	21	0.13	1(0)
Q4L180	FIL1L_HUMAN Filamin A-interacting protein 1-like OS=Homo sapiens GN=FILIP1L PE=1 SV=2	130928	21	0.02	1(0)
Q96TA1	NIBL1_HUMAN Niban-like protein 1 OS=Homo sapiens GN=FAM129B PE=1 SV=3	84598	21	0.04	1(0)
Q9ULL8	SHRM4_HUMAN Protein Shroom4 OS=Homo sapiens GN=SHROOM4 PE=1 SV=3	167035	21	0.02	1(0)
Q9Y3I0	RTCB_HUMAN tRNA-splicing ligase RtcB homolog OS=Homo sapiens GN=C22orf28 PE=1 SV=1	55688	21	0.06	1(0)
A4D0Z3	A4D0Z3_HUMAN ADP-ribosylation factor 5 OS=Homo sapiens GN=ARF5 PE=2 SV=1	20631	20	0.16	1(0)
B2RB06	B2RB06_HUMAN cDNA, FLJ95242, highly similar to Homo sapiens L-3-hydroxyacyl-Coenzyme A dehydrogenase, short chain (HADHSC), mRNA OS=Homo sapiens PE=2 SV=1	34297	20	0.1	1(0)
B4DFZ6	B4DFZ6_HUMAN cDNA FLJ51823, highly similar to Homo sapiens BRF2, subunit of RNA polymerase III transcription initiation factor, BRF1-like (BRF2), mRNA OS=Homo sapiens PE=2 SV=1	44829	20	0.07	1(0)
B4DPH9	B4DPH9_HUMAN cDNA FLJ55895, highly similar to Ras-related protein Rab-7 OS=Homo sapiens PE=2 SV=1	22144	20	0.15	1(0)
B4DZ87	B4DZ87_HUMAN cDNA FLJ57240, highly similar to Mitochondrial proteins import receptor OS=Homo sapiens PE=2 SV=1	57579	20	0.06	1(0)
B5BUB1	B5BUB1_HUMAN RuvB-like 1 (Fragment) OS=Homo sapiens GN=RUVBL1 PE=2 SV=1	50526	20	0.07	1(0)
D6REB9	D6REB9_HUMAN Kynurenine/alpha-aminoadipate aminotransferase, mitochondrial (Fragment) OS=Homo sapiens GN=AADAT PE=2 SV=1	24531	20	0.14	1(0)
E1NZA1	E1NZA1_HUMAN Peroxisome proliferator activated receptor interacting complex protein OS=Homo sapiens GN=PRIC295 PE=2 SV=1	294953	20	0.01	1(0)
H0Y5W0	H0Y5W0_HUMAN E3 ubiquitin-protein ligase HUWE1 (Fragment) OS=Homo sapiens GN=HUWE1 PE=4 SV=1	376696	20	0.01	2(0)
H0YCJ7	H0YCJ7_HUMAN 40S ribosomal protein S3 (Fragment) OS=Homo sapiens GN=RPS3 PE=2 SV=1	15108	20	0.23	1(0)
H0YEN5	H0YEN5_HUMAN 40S ribosomal protein S2 (Fragment) OS=Homo sapiens GN=RPS2 PE=2 SV=1	21426	20	0.16	1(0)
H3BMJ4	H3BMJ4_HUMAN Golgin subfamily A member 6-like protein 2 OS=Homo sapiens GN=GOLGA6L2 PE=2 SV=1	100948	20	0.03	1(0)
H7C0F8	H7C0F8_HUMAN Hepatocyte growth factor-like protein alpha chain (Fragment) OS=Homo sapiens GN=MST1 PE=3 SV=1	21651	20	0.16	1(0)
J3KNB0	J3KNB0_HUMAN F-box only protein 41 OS=Homo sapiens GN=FBXO41 PE=4 SV=1	102194	20	0.03	2(0)
L8EAD7	L8EAD7_HUMAN Alternative protein DHX40 OS=Homo sapiens GN=DHX40 PE=4 SV=1	7996	20	0.44	1(0)
P39905	GDNF_HUMAN Glial cell line-derived neurotrophic factor OS=Homo sapiens GN=GDNF PE=1 SV=1	24161	20	0.14	1(0)
Q5I6Y6	Q5I6Y6_HUMAN Lamin A/C transcript variant 1 OS=Homo sapiens GN=LMNA PE=2 SV=1	74322	20	0.09	2(0)
Q8NE86	MCU_HUMAN Calcium uniporter protein, mitochondrial OS=Homo sapiens GN=MCU PE=1 SV=1	40127	20	0.08	1(0)
B2R5W3	B2R5W3_HUMAN cDNA, FLJ92658, highly similar to Homo sapiens poly (ADP-ribose) polymerase family, member 1 (PARP1), mRNA OS=Homo sapiens PE=2 SV=1	113813	19	0.03	2(0)
B2R6E2	B2R6E2_HUMAN cDNA, FLJ92910, highly similar to Homo sapiens programmed cell death 4 (neoplastic transformation inhibitor) (PDCD4), transcript variant 1, mRNA OS=Homo sapiens PE=2 SV=1	51998	19	0.06	1(0)
B3KXH0	B3KXH0_HUMAN cDNA FLJ45395 fis, clone BRHIP3027191, highly similar to 150 kDa oxygen-regulated protein (Orp150) OS=Homo sapiens PE=2 SV=1	110601	19	0.03	2(2)
B4DLV7	B4DLV7_HUMAN cDNA FLJ60299, highly similar to Rab GDP dissociation inhibitor beta OS=Homo sapiens PE=2 SV=1	51577	19	0.06	2(0)
H0Y6E1	H0Y6E1_HUMAN Annexin A11 (Fragment) OS=Homo sapiens GN=ANXA11 PE=4 SV=1	17031	19	0.2	2(0)
I3L0K7	I3L0K7_HUMAN Heat shock protein 75 kDa, mitochondrial OS=Homo sapiens GN=TRAP1 PE=2 SV=1	57412	19	0.06	2(0)
P46063	RECQ1_HUMAN ATP-dependent DNA helicase Q1 OS=Homo sapiens GN=RECQL PE=1 SV=3	74436	19	0.04	1(0)
Q3B770	Q3B770_HUMAN EIF3A protein (Fragment) OS=Homo sapiens GN=EIF3A PE=2 SV=1	75747	19	0.04	4(0)
Q6FHF5	Q6FHF5_HUMAN Proliferating cell nuclear antigen (Fragment) OS=Homo sapiens GN=PCNA PE=2 SV=1	29029	19	0.11	1(0)
Q6IAT9	Q6IAT9_HUMAN Proteasome subunit beta type OS=Homo sapiens GN=PSMB6 PE=2 SV=1	25570	19	0.13	2(0)
B2RE56	B2RE56_HUMAN Peptidyl-prolyl cis-trans isomerase OS=Homo sapiens PE=2 SV=1	18225	18	0.19	1(0)
B4DKM5	B4DKM5_HUMAN Voltage-dependent anion-selective channel protein 2 OS=Homo sapiens GN=VDAC2 PE=2 SV=1	27804	18	0.12	1(0)
H9ZYJ2	H9ZYJ2_HUMAN Thioredoxin OS=Homo sapiens GN=TXN PE=2 SV=1	12015	18	0.29	1(0)
Q0VAC0	Q0VAC0_HUMAN Heterogeneous nuclear ribonucleoprotein A1 OS=Homo sapiens GN=HNRPA1 PE=2 SV=1	34245	18	0.1	5(0)
Q4W5K9	Q4W5K9_HUMAN Putative uncharacterized protein LIM (Fragment) OS=Homo sapiens GN=LIM PE=2 SV=1	35413	18	0.09	1(0)
Q8N309	LRC43_HUMAN Leucine-rich repeat-containing protein 43 OS=Homo sapiens GN=LRRC43 PE=2 SV=2	73489	18	0.04	2(0)
A0S2P1	A0S2P1_HUMAN Cytochrome c oxidase subunit 2 OS=Homo sapiens GN=COX2 PE=3 SV=1	25689	17	0.13	1(0)
A5HML1	A5HML1_HUMAN Meningioma (Disrupted in balanced translocation) 1 OS=Homo sapiens GN=MN1 PE=2 SV=1	136827	17	0.02	7(0)
B2R4D8	B2R4D8_HUMAN 60S ribosomal protein L27 OS=Homo sapiens PE=2 SV=1	15760	17	0.22	1(0)
B2RDY9	B2RDY9_HUMAN Adenylyl cyclase-associated protein OS=Homo sapiens PE=2 SV=1	51868	17	0.06	1(0)
E9PMD4	E9PMD4_HUMAN FACT complex subunit SSRP1 (Fragment) OS=Homo sapiens GN=SSRP1 PE=2 SV=1	22293	17	0.15	1(0)
E9PQK6	E9PQK6_HUMAN Apoptosis inhibitor 5 OS=Homo sapiens GN=API5 PE=2 SV=1	13889	17	0.25	1(0)
H0Y6W6	H0Y6W6_HUMAN Mediator of RNA polymerase II transcription subunit 12 (Fragment) OS=Homo sapiens GN=MED12 PE=2 SV=1	104525	17	0.03	2(0)
M0R167	M0R167_HUMAN Zinc finger protein 541 (Fragment) OS=Homo sapiens GN=ZNF541 PE=4 SV=1	95622	17	0.03	1(0)
Q5HYM2	Q5HYM2_HUMAN Putative uncharacterized protein DKFZp686O2462 (Fragment) OS=Homo sapiens GN=DKFZp686O2462 PE=4 SV=1	72627	17	0.05	1(0)
Q9NS64	RPRM_HUMAN Protein reprimo OS=Homo sapiens GN=RPRM PE=1 SV=1	11994	17	0.29	1(0)
A1A4F3	A1A4F3_HUMAN Sep (O-phosphoserine) tRNA:Sec (Selenocysteine) tRNA synthase OS=Homo sapiens GN=SEPSECS PE=2 SV=1	49432	16	0.07	1(0)
B1AHC8	B1AHC8_HUMAN X-ray repair complementing defective repair in Chinese hamster cells 6 (Ku autoantigen, 70kDa), isoform CRA_b OS=Homo sapiens GN=XRCC6 PE=2 SV=1	65336	16	0.05	1(0)
B1AK87	B1AK87_HUMAN Capping protein (Actin filament) muscle Z-line, beta, isoform CRA_a OS=Homo sapiens GN=CAPZB PE=2 SV=1	29562	16	0.11	1(0)
B2R9U2	B2R9U2_HUMAN cDNA, FLJ94557, highly similar to Homo sapiens FK506 binding protein 4, 59kDa (FKBP4), mRNA OS=Homo sapiens PE=2 SV=1	52087	16	0.06	1(0)
B3KWE0	B3KWE0_HUMAN cDNA FLJ42838 fis, clone BRCAN2021028 OS=Homo sapiens PE=2 SV=1	62323	16	0.05	1(0)
B4DIT2	B4DIT2_HUMAN cDNA FLJ60067, highly similar to Oligophrenin 1 OS=Homo sapiens PE=2 SV=1	80584	16	0.04	1(0)
B4DUT7	B4DUT7_HUMAN cDNA FLJ57604, highly similar to GMP synthase (glutamine-hydrolyzing) (EC 6.3.5.2) OS=Homo sapiens PE=2 SV=1	71880	16	0.05	1(0)
D3DUZ3	D3DUZ3_HUMAN Interferon, gamma-inducible protein 16, isoform CRA_a OS=Homo sapiens GN=IFI16 PE=4 SV=1	82827	16	0.04	1(0)
E7EN95	E7EN95_HUMAN Filamin-B OS=Homo sapiens GN=FLNB PE=2 SV=1	258059	16	0.01	2(0)
H0Y799	H0Y799_HUMAN Bromodomain-containing protein 2 (Fragment) OS=Homo sapiens GN=BRD2 PE=4 SV=1	32270	16	0.1	1(0)
I3L1M4	I3L1M4_HUMAN Fatty aldehyde dehydrogenase (Fragment) OS=Homo sapiens GN=ALDH3A2 PE=2 SV=1	18870	16	0.18	1(0)
P30044	PRDX5_HUMAN Peroxiredoxin-5, mitochondrial OS=Homo sapiens GN=PRDX5 PE=1 SV=4	22301	16	0.15	1(0)
Q0VG01	Q0VG01_HUMAN Zinc finger protein 112 homolog (Mouse) OS=Homo sapiens GN=ZFP112 PE=2 SV=1	107400	16	0.03	1(0)
Q4VKH8	Q4VKH8_HUMAN P2X purinoceptor OS=Homo sapiens GN=P2RX7 PE=2 SV=1	59752	16	0.06	1(0)
Q96LK9	Q96LK9_HUMAN cDNA FLJ25413 fis, clone TST03402, highly similar to 3-OXO-5-BETA-STEROID 4-DEHYDROGENASE (EC 1.3.99.6) OS=Homo sapiens PE=2 SV=1	16911	16	0.2	1(0)
Q9H4L5	OSBL3_HUMAN Oxysterol-binding protein-related protein 3 OS=Homo sapiens GN=OSBPL3 PE=1 SV=1	102130	16	0.03	3(0)
A8K4D5	A8K4D5_HUMAN Kynureninase OS=Homo sapiens GN=KYNU PE=2 SV=1	52819	15	0.06	1(0)
B3KVM3	B3KVM3_HUMAN HCG16695 OS=Homo sapiens GN=hCG_16695 PE=2 SV=1	66426	15	0.05	1(0)
F1T0B3	F1T0B3_HUMAN ATP-dependent RNA helicase DDX1 OS=Homo sapiens GN=DDX1 PE=2 SV=1	74838	15	0.04	1(0)
F5GWI9	F5GWI9_HUMAN WASH complex subunit CCDC53 OS=Homo sapiens GN=CCDC53 PE=2 SV=1	18580	15	0.18	2(0)
F6R8P8	F6R8P8_HUMAN SH3-containing GRB2-like protein 3-interacting protein 1 (Fragment) OS=Homo sapiens GN=SGIP1 PE=2 SV=1	28534	15	0.12	1(0)
Q2TSD2	Q2TSD2_HUMAN Aging-associated gene 7 protein OS=Homo sapiens PE=2 SV=1	41778	15	0.08	1(0)
Q8IV97	Q8IV97_HUMAN Solute carrier family 7 (Cationic amino acid transporter, y+ system), member 5 OS=Homo sapiens GN=SLC7A5 PE=2 SV=1	55643	15	0.06	2(0)

## Sheet: Table S3 kinases
				in vitro			in situ
ID	Description	Mass	Score	emPAI	Peptides Matched	Score	emPAI	Peptides Matched
P78527	PRKDC_HUMAN DNA-dependent protein kinase catalytic subunit OS=Homo sapiens GN=PRKDC PE=1 SV=3	473749	431	0.13	22(9)	52	0.04	1(0)
H3BTN5	H3BTN5_HUMAN Pyruvate kinase (Fragment) OS=Homo sapiens GN=PKM PE=2 SV=1	53524	388	0.93	19(11)	127	0.27	6(3)
B2R5T5	B2R5T5_HUMAN Protein kinase, cAMP-dependent, regulatory, type I, alpha (Tissue specific extinguisher 1), isoform CRA_a OS=Homo sapiens GN=PRKAR1A PE=2 SV=1	43183	61	0.08	2(1)	34	0.08	1(0)
P60891	PRPS1_HUMAN Ribose-phosphate pyrophosphokinase 1 OS=Homo sapiens GN=PRPS1 PE=1 SV=2	35325	41	0.29	2(0)	46	0.18	1(0)
G3V5T9	G3V5T9_HUMAN Cyclin-dependent kinase 2 OS=Homo sapiens GN=CDK2 PE=2 SV=1	39553	39	0.17	2(0)	29	0.17	2(0)
Q5R3A8	Q5R3A8_HUMAN Tyrosine-protein kinase Fyn OS=Homo sapiens GN=FYN PE=2 SV=1	55205	25	0.11	4(0)	25	0.05	2(0)
E5RIU6	E5RIU6_HUMAN Cyclin-dependent kinase 1 (Fragment) OS=Homo sapiens GN=CDK1 PE=2 SV=2	21782	23	0.15	3(0)	40	0.33	2(0)
P00558	PGK1_HUMAN Phosphoglycerate kinase 1 OS=Homo sapiens GN=PGK1 PE=1 SV=3	44985	264	1.03	11(4)
P15531	NDKA_HUMAN Nucleoside diphosphate kinase A OS=Homo sapiens GN=NME1 PE=1 SV=1	15422	100	0.82	3(1)
B7Z7A9	B7Z7A9_HUMAN Phosphoglycerate kinase OS=Homo sapiens GN=PGK1 PE=2 SV=1	41802	59	0.43	4(0)
P10398	ARAF_HUMAN Serine/threonine-protein kinase A-Raf OS=Homo sapiens GN=ARAF PE=1 SV=2	68341	55	0.13	2(1)
H0YFA7	H0YFA7_HUMAN Bifunctional UDP-N-acetylglucosamine 2-epimerase/N-acetylmannosamine kinase OS=Homo sapiens GN=GNE PE=2 SV=2	79555	48	0.04	1(1)
P13861	KAP2_HUMAN cAMP-dependent protein kinase type II-alpha regulatory subunit OS=Homo sapiens GN=PRKAR2A PE=1 SV=2	45832	47	0.07	4(1)
B5BU16	B5BU16_HUMAN Mitogen-activated protein kinase kinase 6 OS=Homo sapiens GN=MAP2K6 PE=2 SV=1	37782	43	0.18	2(0)
A4QPA9	A4QPA9_HUMAN Mitogen-activated protein kinase kinase 1 OS=Homo sapiens GN=MAP2K1 PE=2 SV=1	43753	40	0.08	2(1)
B4DHB3	B4DHB3_HUMAN Phosphoglycerate kinase OS=Homo sapiens PE=2 SV=1	30258	38	0.11	1(0)
Q5JT09	Q5JT09_HUMAN Uridine-cytidine kinase 1 OS=Homo sapiens GN=UCK1 PE=2 SV=1	32540	38	0.1	1(1)
Q14DU5	Q14DU5_HUMAN ROCK2 protein OS=Homo sapiens GN=ROCK2 PE=2 SV=1	82724	36	0.04	1(0)
Q01813	K6PP_HUMAN 6-phosphofructokinase type C OS=Homo sapiens GN=PFKP PE=1 SV=2	86454	34	0.12	3(0)
G3V461	G3V461_HUMAN Creatine kinase B-type (Fragment) OS=Homo sapiens GN=CKB PE=2 SV=1	14383	32	0.24	1(0)
P08237	K6PF_HUMAN 6-phosphofructokinase, muscle type OS=Homo sapiens GN=PFKM PE=1 SV=2	85984	31	0.05	1(0)
P36507	MP2K2_HUMAN Dual specificity mitogen-activated protein kinase kinase 2 OS=Homo sapiens GN=MAP2K2 PE=1 SV=1	44681	31	0.07	2(0)
F8WBH4	F8WBH4_HUMAN Interferon-induced, double-stranded RNA-activated protein kinase (Fragment) OS=Homo sapiens GN=EIF2AK2 PE=2 SV=1	11298	30	0.3	1(0)
Q13131	AAPK1_HUMAN 5~-AMP-activated protein kinase catalytic subunit alpha-1 OS=Homo sapiens GN=PRKAA1 PE=1 SV=4	64596	30	0.1	2(0)
P19367	HXK1_HUMAN Hexokinase-1 OS=Homo sapiens GN=HK1 PE=1 SV=3	103561	28	0.05	1(0)
Q15208	STK38_HUMAN Serine/threonine-protein kinase 38 OS=Homo sapiens GN=STK38 PE=1 SV=1	54498	27	0.06	1(0)
Q7Z7Q6	Q7Z7Q6_HUMAN Hexokinase II (Fragment) OS=Homo sapiens PE=2 SV=1	5875	25	0.61	1(0)
M0QYH2	M0QYH2_HUMAN Bifunctional polynucleotide phosphatase/kinase OS=Homo sapiens GN=PNKP PE=4 SV=1	54120	23	0.06	1(0)
F8VTV8	F8VTV8_HUMAN Cyclin-dependent kinase 4 OS=Homo sapiens GN=CDK4 PE=2 SV=1	22238	22	0.32	3(0)
Q5JQ10	Q5JQ10_HUMAN Adenosine kinase, isoform CRA_a OS=Homo sapiens GN=ADK PE=2 SV=1	39078	20	0.08	1(0)
Q9Y6E0	STK24_HUMAN Serine/threonine-protein kinase 24 OS=Homo sapiens GN=STK24 PE=1 SV=1	49562	20	0.09	1(0)
J3KPD9	J3KPD9_HUMAN Nucleoside diphosphate kinase B OS=Homo sapiens GN=NME2 PE=3 SV=1	22522	19	0.15	1(0)
P32298	GRK4_HUMAN G protein-coupled receptor kinase 4 OS=Homo sapiens GN=GRK4 PE=1 SV=3	67738	18	0.05	1(0)
C1PHA2	C1PHA2_HUMAN Tyrosine-protein kinase receptor OS=Homo sapiens GN=KIF5B-ALK PE=2 SV=1	169283	16	0.02	3(0)
H3BNI9	H3BNI9_HUMAN Casein kinase II subunit alpha~ (Fragment) OS=Homo sapiens GN=CSNK2A2 PE=2 SV=1	15632	16	0.22	2(0)
Q05655	KPCD_HUMAN Protein kinase C delta type OS=Homo sapiens GN=PRKCD PE=1 SV=2	78652				39	0.05	1(1)
Q8IWB6	TEX14_HUMAN Inactive serine/threonine-protein kinase TEX14 OS=Homo sapiens GN=TEX14 PE=1 SV=2	169107				36	0.02	1(1)
H7C175	H7C175_HUMAN Serine/threonine-protein kinase LMTK1 OS=Homo sapiens GN=AATK PE=2 SV=2	135361				32	0.02	1(0)
Q4LE51	Q4LE51_HUMAN PIK3CA variant protein (Fragment) OS=Homo sapiens GN=PIK3CA variant protein PE=2 SV=1	126129				16	0.03	1(0)
